# Supplementary material for: Assessing long-distance RNA sequence connectivity via RNA-templated DNA–DNA ligation
Source: eLife journal article supplement (doi:10.7554/elife.03700), 2015-04-13

A

|                      |                                                                                                                                                                                                                                        |
|----------------------|----------------------------------------------------------------------------------------------------------------------------------------------------------------------------------------------------------------------------------------|
| Read Pre-processing  | Debarcode (Custom Perl Script)<br>Combine paired-end reads into single sequence (e.g. <code>`pear -f FOR_READS -r REV_READS -o LIBRARY_NAME`</code> )                                                                                  |
| Dscam1 Isoform Index | Create all 4,6,&9 ligamer combinations<br>Assign unique name to each combination (e.g. <code>`&gt;9v9:6v30:4v2`</code> )<br>Create bowtie2 index of combinations ( <code>`bowtie2-build dscam.ligamer.combinations.fa dscam1`</code> ) |
| Read Alignment       | Align reads to all possible Dscam1 ligamer combinations (e.g. <code>`bowtie2 --local --very-sensitive-local -no-discordant`</code> )                                                                                                   |
| Data Analysis        | Filter for high-confidence alignments (e.g. <code>`samtools view -q 31 -b5`</code> )<br>Analyze using R and R packages (e.g. <code>dplyr()</code> , <code>ggplot()</code> , <code>DESeq()</code> )                                     |

B

In Vitro Isoform    Template-Switched isoform    Source-unknown isoform    Near-cognate ligation    In vivo isoform

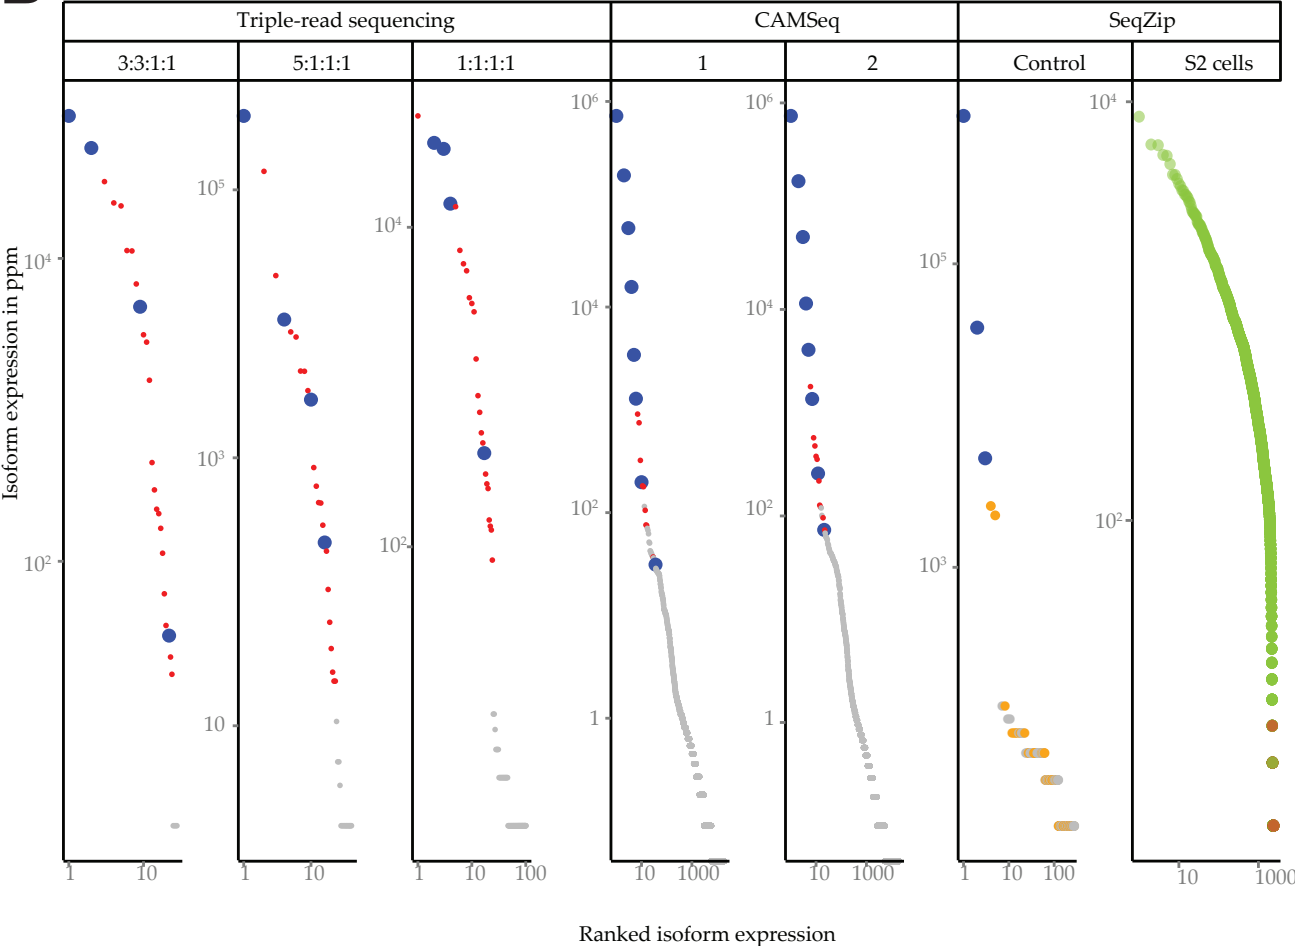

Supplement: supp [file elife-03700-supp-v1.zip]
