# Supplementary material for: Assessing long-distance RNA sequence connectivity via RNA-templated DNA–DNA ligation
Source: eLife. 2015 Apr 13;4:e03700. doi: 10.7554/eLife.03700 (PMC4442144; doi:10.7554/eLife.03700)
Supplement: Supplementary file 1. — Ligamer sequences and other information. DOI: http://dx.doi.org/10.7554/eLife.03700.017 [file elife03700s001.xls]

## Sheet: SeqZip_POC_Ligamers_and_Oligos
Name		Sequence		Notes
Mouse DDX1 Template	5´	ATGGCGGCCTTCTCCGAAATGGgtgttatgccggagattgcacaagctgtggaggagatggattggcttctaccaactgatatccaggcagaatctatcccattgatcctaggaggaggggatgtactcatggctgcagaaacaggaagtggaaaaactggtgcatttagtattcccgttatccagatagtgtatgaaactctgaaagaccaacaggaaggaaagaaagggaaaacaactattaaaactggtgcttcagtgctcaacaagtggcagatgaacccaTATGATAGAGGGTCTGCTTTTG	3´	uc007nbh.1__Ddx1:56+362
DDX1~300ntdsPrimer	5´	CAAAAGCAGACCCTCTATCATA	3´	Antisense primer to amplify ddx1 RNA template
T7Prom+DDX1ATGPrimer1	5´	TAATACGACTCACTATAGGATGGCGGCCTTCTCCGAAATGG	3´	Sense primer to amplify ddx1 template and put on T7 promotoer
DDX1-Exon1-3'-RC	5´	AGCCAATCCATCTCCTCCAC	3´	Proof of concept straight oligo
DDX1-Exon2-5'-RC	5´	CCTGGATATCAGTGGGTAGA	3´	Proof of concept straight oligo
DDX-Exon2-Middle1-RC	5´	GATCAATGGGATAGATTCTG	3´	Proof of concept straight oligo
DDX1-Exon2-Middle2-RC	5´	AGTACATCACCTCCTCCTAG	3´	Proof of concept straight oligo
DDX1-Exon2-3-Span-RC	5´	TTCCCGTTTCTGCAGCCATA	3´	Proof of concept straight oligo
CR-DDX1-80merDNAControl	5´	GTGGAGGAGATGGATTGGCTTCTACCCACTGATATCCAGGCAGAATCTATCCCATTGATCCTAGGAGGAGGTGATGTACT	3´	Proof of concept DNA control
CR-DDX1-8nt-V4-Loopout	5´	CAGAAGCATCATCATAAATGCA	3´	Loopout experiment oligo
CR-DDX1-8nt-V3-Loopout	5´	CCAGTTTTTCATCATCTGCAGC	3´	Loopout experiment oligo
CR-DDX1-8nt-V2-Loopout	5´	CATAAGTATCATCATGGGTAGA	3´	Loopout experiment oligo
CR-DDX1-8nt-V1-Loopout	5´	AGCCAATCTCATCAACCCATTT	3´	Loopout experiment oligo

## Sheet: Trans-Transcript
Name		Sequence		Notes
LTL-Frwd-X	5´	GCTGCACAGGGGGAGATAATACGACTCACTATAGGGCTACTCTGTGGGGATGCAGTGACACCATGGGCCTGCGGGAGGACCTGCTGCGGG	3´	Using plasmid with NM_014740 as template, forward primer that introduces T7 + Unique Sequence
LTL-Rev-Y	5´	TTTTTTTTTTTTTTTTTTTTTTTTTTTTTTCAGCTCATCATCTGGCCATTTTCTCCCTGAAGGATGCGGATGTCGTCATTCTTTACAAAG	3´	Using plasmid with NM_014740 as template, reverse primer that introduces unique Sequence + polyA
LTL-Frwd-V	5´	GGGAGATAATACGACTCACTATAGGGTTGATCGCCCTAAAGGACTGGCATTCACTGGACACCATGGGCCTGCGGGAGGACCTGCTGCGGG	3´	Using plasmid with NM_014740 as template, forward primer that introduces T7 + Unique Sequence
LTL-Rev-Z	5´	TTTTTTTTTTTTTTTTTTTTTTTTTTTTTTTGCCTGGAGTGAGGTTGGTGAGGGTGATGGAGGATGCGGATGTCGTCATTCTTTACAAAG	3´	Using plasmid with NM_014740 as template, reverse primer that introduces unique Sequence + polyA
LTL-Sense	5´	GCCTCCCTCGCGCCATCAGATCGTAGGCACCTGAAA	3´	Forward primer for transexperiment ligamers
LTL-AntiSense	5´	GCCTTGCCAGCCCGCTCAGATTGATGGTGCCTACAG	3´	Reverse primer for transexperiment ligamers
LTL-Ligamer-X	5´	/5Phos/ACTGCATCCCCACAGAGTATCATCATCATCATCATCATCATCTGAGCGGGCTGGCAAGGC	3´	Terminal ligamer specific for unique sequence X
LTL-Ligamer-W	5´	/5Phos/AGGATGCGGATGTCGTCATTCTTTACAAAGTCATCATCATCGCAGGCCCATGGTGTC	3´	Internal ligamer to common sequence W
LTL-Ligamer-Y	5´	GCCTCCCTCGCGCCATCAGATCATCATCATCAGCTCATCATCTGGCCATTTTCTCCCTGA	3´	Terminal ligamer specific for unique sequence Y
LTL-Ligamer-V	5´	/5Phos/CAGTGAATGCCAGTCCTTTAGGGTCATCTCTGAGCGGGCTGGCAAGGC	3´	Terminal ligamer specific for unique sequence V
LTL-Ligamer-Z	5´	GCCTCCCTCGCGCCATCAGAGGTTGGTGAGGGTGATGG	3´	Terminal ligamer specific for unique sequence Z

## Sheet: CD45 Ligamers
Name		Sequence		Notes
CD45 - E3 - Forward	5´	GGCAAAGCCCAACACCTTCCCCCACTG	3´	Forward PCR primer for endogenous transcripts
CD45-E9/10 - Reverse	5´	CTGAAACTTTTCAACCCCTGGTGGCAC	3´	Antisense PCR and GSP RT primer for endogenous transcritpts
CD45-Sense	5´	GCCTCCCTCGCGCCATCAGATCGTAGGCACCTGAAA	3´	CD45 ligation product forward primer
CD45-AntiSense	5´	GCCTTGCCAGCCCGCTCAGATTGATGGTGCCTACAG	3´	CD45 ligation product reverse primer
CD45-E7-454-Endog	5´	GCCTCCCTCGCGCCATCAGATCGTAGGCACCTGAAAGGGCTCAGAGTGGTTGTTTC	3´	CD45 ligamer
CD45-E7-R0-Ctrl	5´	/5Phos/AGAGGCATTAAGGTAGGCAT	3´	CD45 ligamer
CD45-E6-454-Endog	5´	/5Phos/CTGAGGTGTTCGCTGTCATCACCTCTCTCCTGGGACAT	3´	CD45 ligamer
CD45-E5-454-Endog	5´	/5Phos/CTGAGATAGCATTGCTGCTCATCACGTCTGTACTGATGAAACAC	3´	CD45 ligamer
CD45-E4-454-Endog	5´	/5Phos/CTGTGGTATTAAAAGCACTATCATCACATCTTTGCTGTAGTCAATC	3´	CD45 ligamer
CD45-E3-454-Endog	5´	/5Phos/CAGTGGGGGAAGGTGTTGGGCTGTAGGCACCATCAATCTGAGCGGGCTGGCAAGGC	3´	CD45 ligamer

## Sheet: Fn1 Ligamers
Name		Sequence		Notes
FN1-v9-1-T-3	5´	GCCTCCCTCGCGCCATCAGAGGTTGTCTGAGAGAGAGCTTCCTGTC	3´	#TERMINAL V-REG EXON 40 0
FN1-v9-2-I-L	5´	/5Phos/CTGTAGAGGCATTTGGATTGAGGCCACACACACAGTTGGTGATGAAGGGGGTCTTTTGAA	3´	#AS V-REG EXON 40 95 (285 NT )
FN1-v9-3-I-L	5´	/5Phos/CTGTGGAGGGAACATCCAAGATCTCTTCTGGGTAACCAGTTGGGGAAGCTCAT	3´	#AS V-REG EXON 40 120 (75 NT)
FN1-v9-4-T-C-5-I	5´	/5Phos/CTGTCTTCTTCCTCCCAATCAGGGGCTCAC	3´	#IDIVIDUAL CONTROL AND TERMINAL EXON FOR EXON 39
FN1-v9-5-T-C-5-T	5´	/5Phos/TCTTCTGATTGTTCTTCAGGGCAATGACGTAGATCTGAGCGGGCTGGCAAGGC	3´	#IDIVIDUAL CONTROL AND TERMINAL EXON FOR EXON 39
FN1-v9-6-I-L-C	5´	/5Phos/CTGTCTTCTTCCTCCCAATCAGGGGACTACATTGGTGGGCGCAGGAATGG	3´	#CONNECTOR- V-REG TO EDA
FN1-v9-7-I-L-C	5´	/5Phos/CTGTCTTCTTCCTCCCAATCAGGGGACTACATCCGTGGGAGGAGGGACAG	3´	#CONNECTOR - V-REG TO EDB!!
FN1-v9-8-T-3	5´	GCCTCCCTCGCGCCATCAGAATTGGTGGGCGCAGGAATGG	3´	#IDIVIDUAL TERMINAL EXON FOR EXON 35
FN1-v9-9-I-L	5´	/5Phos/CTGTGGACTGGATTCCAATCAGGGGTCATCTCATCATCATCAGCCAGTCCTTTAGGGCGATCAATGT	3´	#AS EDA ( 270 NT)
FN1-v9-10-T-5	5´	/5Phos/TGGTCACTGCAGTTTGAACCAGGTCTGAGCGGGCTGGCAAGGC	3´	#TERMINAL FOR EXON EDA (EXON33) TARGETING EXON 34
FN1-v9-11-T-C-5-I	5´	/5Phos/TGGTCACTGCAGTTTGAACCAGGGGCTGGC	3´	#TERMINAL AND CONTROL FOR EXON EDA (EXON33) TARGETING EXON 34
FN1-v9-12-T-C-5-T	5´	/5Phos/TTTCTCCGTTCCGGTTCTGAGCATAAACACTAATCTGAGCGGGCTGGCAAGGC	3´	#TERMINAL AND CONTROL FOR EXON EDA (EXON33) TARGETING EXON 34
FN1-v9-13-I-L-C	5´	/5Phos/TGGTCACTGCAGTTTGAACCAGGACTACATCCGTGGGAGGAGGGACAG	3´	#CONNECTOR - EDA TO EDB
FN1-v9-14-T-3	5´	GCCTCCCTCGCGCCATCAGAATCCGTGGGAGGAGGGACAG	3´	#TERMINAL LIGAMER LIGAMERS FOR EDB, TARGETING EXON 26.
FN1-v9-15-I-L	5´	/5Phos/CCGTTTGCTGTGTCAGTGTAGTAGGACTACTGTCAGTGAGCTGGGGCACCT	3´	#AS EDB, EXON 25, (273NT)
FN1-v9-16-T-C-5-I	5´	/5Phos/CTGGGACAACGGTATCAGAGATAGGGGCAC	3´	#TERMINAL AND CONTROL FOR EDB. TARGETING EXON 24
FN1-v9-17-T-C-5-T	5´	/5Phos/TTTCCTTGTCATCTTTGACAGTGTAAACACTGATCTGAGCGGGCTGGCAAGGC	3´	#TERMINAL AND CONTROL FOR EDB. TARGETING EXON 24
FN1-v9-18-T-5	5´	/5Phos/CTGGGACAACGGTATCAGAGATAGGGTCTGAGCGGGCTGGCAAGGC	3´	#TERMINAL AND CONTROL FOR EDB. TARGETING EXON 24
FN1-Sense	5´	GCCTCCCTCGCGCCATCAGA	3´	# FIVE PRIME SENSE PCR SEQUENCE FOR AMPLIFICATION
FN1-Antisense	5´	GCCTTGCCAGCCCGCTCAGA	3´	# THREE PRIME ANTISENSE PCR SEQUENCE FOR AMPLIFICATION

## Sheet: Dscam Ligamers
Name		Sequence		Notes
DSCAM:V3:T5:E3	5´	/5Phos/CGGCTCGCACATGGACGTCCGCCTCCCTCGCGCCATCAGA	3´	NA
DSCAM:V3:T3-E10	5´	ATCTGAGCGGGCTGGCAAGGCTCGAGGATCCATCTGGGAGGTA	3´	NA
DSCAM-v5-9-9	5´	/5Phos/CATTAACTTGTAATTCAGCTACATATTCACGGTCAACAAAACCTGGGGCGGCA	3´	NA
DSCAM-v5-9-8	5´	/5Phos/CATTCACGTGCAATTCAGCGCTGACGGCACAAACGCTTGGATTTGGGGAGGAA	3´	NA
DSCAM-v5-9-7	5´	/5Phos/CGTTGACATCTAGTGTGGAAACGTATTAGCCAGGGGGCTAATCTGTGGTGCAA	3´	NA
DSCAM-v5-9-6	5´	/5Phos/CATTGACTTGCAGGTCAGCGGAGTGACATGGGCAGGACATGGGGAGGTA	3´	NA
DSCAM-v5-9-5	5´	/5Phos/CGTTGACTTTCAGCTCCGATGTTGTCCGGCCACGGCGCTATCGACGGTGGAA	3´	NA
DSCAM-v5-9-4	5´	/5Phos/CATTGACAGCTAGGATGGCGGACAAGCCCCGAAGGGCATTATTTGGGGCAGGA	3´	NA
DSCAM-v5-9-3	5´	/5Phos/CATTCACTGCTAGCATGGCGGATTGACCGGGGCACGACCTGGGGTAAGA	3´	NA
DSCAM-v5-9-27	5´	/5Phos/CCTTCACTTTCAGGATGGACCAGCGGCATTGACTGATCAACCTGGGGCAGCT	3´	NA
DSCAM-v5-9-26	5´	/5Phos/CCTTGACACTCAGGTGGGTCTCACCCTTTTGGGAGCCAGTTTGGGGGGCA	3´	NA
DSCAM-v5-9-25	5´	/5Phos/CGTAGACGTTCAGCGGCGTGGGGAAAACGAAGGGTATGATGCGCGGAAGAA	3´	NA
DSCAM-v5-9-24	5´	/5Phos/CATTAACTATGAGTTCAGTGCTGTAGTCCGTAACGGCGTGATTTTCGGAGGAA	3´	NA
DSCAM-v5-9-23	5´	/5Phos/CATTAACTATTAGTTCGGTGGTATAAAAGGAAGGGGCGTAATTTTGGGTGGAA	3´	NA
DSCAM-v5-9-22	5´	/5Phos/CATTGACAATAAGGGCCGCCGATTGCAATAAGGAGCAAGTTTCGGTGGGG	3´	NA
DSCAM-v5-9-21	5´	/5Phos/CATTCACAATCAACTCGGTTGTGAAGCGTACAAGGGAGTGATTTTAGGAGGAA	3´	NA
DSCAM-v5-9-20	5´	/5Phos/CGTTCACTACGAGATCGAAGGTGTACAGGACCAGGGTGTGATTTTCGGGGGAA	3´	NA
DSCAM-v5-9-2	5´	/5Phos/CATTGACGGCCAGGACTGCCGGGTCCTGGGCACGATCTGGGGCAGAA	3´	NA
DSCAM-v5-9-19	5´	/5Phos/CGTTCACAATCAAGCTGGTGGTATGCACGCAAAGGGAGTAATCTTTGGGGGAA	3´	NA
DSCAM-v5-9-18	5´	/5Phos/CGTTCACAATTAAATCGGTGGTGTAGTTGGAACTGGAGTGATCTTGGGTGGAG	3´	NA
DSCAM-v5-9-17	5´	/5Phos/CGTTCACAATCAGGGCCGCTGAGGAGAAGGGCGCAATTTTCGGTGGTG	3´	NA
DSCAM-v5-9-16	5´	/5Phos/CATTCACAATCAATTCAGCCGAGTATTCTGCAGCTGGGCGATTTTTGGTGGCA	3´	NA
DSCAM-v5-9-15	5´	/5Phos/CATTCACCACCAGTTCGGCGGAGGAAGGTGGGGCAATTTTCGGAGCCA	3´	NA
DSCAM-v5-9-14	5´	/5Phos/CATTAACTTTCAACTCGGCCGTGTCGTAGTAAAGGGACTTATCTTTGGCAGTG	3´	NA
DSCAM-v5-9-13	5´	/5Phos/CATTCACGATCAGCCGCGCCGTGCATAAGGACGCTATCTTGGGAGCCA	3´	NA
DSCAM-v5-9-12	5´	/5Phos/CGTTCACTGTCAGGTCAACGCTATATCGGAATCGGGCACAATTTGGGGCAGAA	3´	NA
DSCAM-v5-9-11	5´	/5Phos/CATTGACGAGCAGCTCGGCGACGTATGCGGATGGATGCTGGGCAGGA	3´	NA
DSCAM-v5-9-10	5´	/5Phos/CGTTGACTTTCAACTCAGCACTGTAGTAGGATTGGGTCGAATTTGTGGAGGCA	3´	NA
DSCAM-v5-9-1	5´	/5Phos/CGTTAACGCGCAGCTCTGCCCAGCCGAGGGTACGACCTGCGGTGGAA	3´	NA
DSCAM-v5-6-9	5´	/5Phos/CTGAAGGACGGGGTAGGATACGACTCCTTCCTCGGACACTGCCCACGGGTT	3´	NA
DSCAM-v5-6-8	5´	/5Phos/TTGAAAACAGGCATGGGATACGATTGTGACGTCGGCCACACTGCCAACGGGTT	3´	NA
DSCAM-v5-6-7	5´	/5Phos/CTAGATATTGGCTGTGGATATGCCTCTCCTCTGACTGACGCTACCAATTGGTT	3´	NA
DSCAM-v5-6-6	5´	/5Phos/CTAAAGAAAGGCTGTGGATACGCTTGAACCTTGACTGACTGTGCCAACAGGCT	3´	NA
DSCAM-v5-6-5	5´	/5Phos/CTATACACCGGCACGGGATAAGCTTACGTGCCCCAACGCTGCCAACGGGTT	3´	NA
DSCAM-v5-6-4	5´	/5Phos/CTAAAGAAGGGCACTGGATAGGCTTGTCCTGGGACTTACACTTCCGACCGGTT	3´	NA
DSCAM-v5-6-37	5´	/5Phos/CTAAACACTGGATGCGGATACGCTCACACGCGGAGCTACACTACCAATGGGTT	3´	NA
DSCAM-v5-6-36	5´	/5Phos/CTGATAATGGGTACTGGAAAAGCCTGCATCTCGGGCTTTGGCGCCAACTGGCT	3´	NA
DSCAM-v5-6-35	5´	/5Phos/CTCATAGCGGGAACTGGATAGGCCTGCGCGTAGCCCTGGCGCCAATGGGTT	3´	NA
DSCAM-v5-6-34	5´	/5Phos/CTCATAATGGGAACTGGATATGCCTGAGGACACTACTCTTGCCCCGATGGGCT	3´	NA
DSCAM-v5-6-33	5´	/5Phos/TTAAATATTGGTACAGGATAGGATTGGCTCTCTCGCCTTAAATCCCACAGGCT	3´	NA
DSCAM-v5-6-32	5´	/5Phos/CTAAAAACTGGCACCGGAAATGCAGCGCTGCGGAGCCTTGGAACCAATAGGTT	3´	NA
DSCAM-v5-6-31	5´	/5Phos/CTAATGATGGGCACTGGAAAGGCTTCCCCTTGGCCTTGGCGCCAACGGGCT	3´	NA
DSCAM-v5-6-30	5´	/5Phos/CTGCTAATGGGCACCGGATATGCCTCGGAACGCCTTGGCCGAGATGGGCT	3´	NA
DSCAM-v5-6-3	5´	/5Phos/CTAAAGAAGGGCACCGGATAAGCCCGCATGTGGTCCAATACTGCCAACAGGCT	3´	NA
DSCAM-v5-6-29	5´	/5Phos/CGAAAACTAGGAGCCGGAAAGCCAGCCGACGGGAGCACTGCTCGAAATAGGCT	3´	NA
DSCAM-v5-6-28	5´	/5Phos/CTAAAGGCGGGAACTGGAAATCCCTCCAGAGAGCTTTACCGCCGACGGGTT	3´	NA
DSCAM-v5-6-27	5´	/5Phos/CTAAAACTAGGAGCTGGATAGCCTTGGGACTGATGGACTACTGCTAACGGGCT	3´	NA
DSCAM-v5-6-26	5´	/5Phos/CTAAACACAGGCACCGGGTAGCCGCCGCATGGGTACAGCACTGCTTATAGGTT	3´	NA
DSCAM-v5-6-25	5´	/5Phos/CTGAAGAATGGTACCGGATATGCCTGACCAGCCACCCACACTTCCCACAGGCT	3´	NA
DSCAM-v5-6-24	5´	/5Phos/CTAAAGAAGGGTACTGGATAGGCTTGATACTGCGGCAACACTGCCCACAGGTT	3´	NA
DSCAM-v5-6-23	5´	/5Phos/CTAAACGATGGTACCGGATACGATTGAGTCGGCTCCTACACTGCCAACGGGCT	3´	NA
DSCAM-v5-6-22	5´	/5Phos/CTGAATGCAGGAACCGGATAGGATTGCCCAGGACTGCACACTACCCACAGGCT	3´	NA
DSCAM-v5-6-21	5´	/5Phos/CTATAGAAGGGCACGGGGTAGGCAACTGGCTGCCACGCTGCCCACGGGCT	3´	NA
DSCAM-v5-6-20	5´	/5Phos/CTATAAACGGGCACTGGAAAGGACTGTTCGGGGCGCCACACTTCCAACGGGCT	3´	NA
DSCAM-v5-6-2	5´	/5Phos/CTAAAGACTGGCACTGGATATGATTGAGAACGTTACCACACTCGCAATGGGTT	3´	NA
DSCAM-v5-6-19	5´	/5Phos/CTATAAACCGGAACCGGAAAGGCCGGCCGGTGGAGCAACACTACCAATGGGTT	3´	NA
DSCAM-v5-6-18	5´	/5Phos/CTAAAAGCTGGGATTGGATACGATTGACACTGTACCCACACTGCCAACGGGCT	3´	NA
DSCAM-v5-6-17	5´	/5Phos/CTAAACGCTGGCATTGGATAACCTTATCGGTCGTGCCACACTACCAACAGGTT	3´	NA
DSCAM-v5-6-16	5´	/5Phos/CTAAATGCCGGCATAGGAAATCCTTGCTGCCGTGGCAACACTGCCCACGGGTT	3´	NA
DSCAM-v5-6-15	5´	/5Phos/CTATAAACTGGCATGGGATACGACTGAGCCAGTTGCTACACTGCCCACAGGTT	3´	NA
DSCAM-v5-6-14	5´	/5Phos/CGGAAGGCAGGCACTGGATAAGATCCTAAGGCCACACTACCGACGGGTT	3´	NA
DSCAM-v5-6-13	5´	/5Phos/CTAAAGAACGGCATTGGATACGACTGATGCATACGCCACTGAGCCTACGGGTT	3´	NA
DSCAM-v5-6-12	5´	/5Phos/CTAACAATTGGCACCGGGTATGCCGCCTTAGGGCGGAACAGATCCAATGGGTT	3´	NA
DSCAM-v5-6-11	5´	/5Phos/CTGTTAATGGGTACTGGAAATGCCTGACACGTATGGAACCGAAGCTACGGGCT	3´	NA
DSCAM-v5-6-10	5´	/5Phos/CTGTGGGCTGGAATCGGATATGACTAGCATCAGCTTGACAGAGCCAACGGGTT	3´	NA
DSCAM-v5-6-1	5´	/5Phos/CTAAAAAGGGGAGCTGGATAAGCCTTTCCTTCGCGAAACTCTGCCAACTGGTT	3´	NA
DSCAM-v5-4-9	5´	/5Phos/CCGTCTCTGCGGCATTGTTCGTCTCAACTCCGATTCATAGCTTTGGATGACCA	3´	NA
DSCAM-v5-4-8	5´	/5Phos/CATAGGCGTCGGTGGCATTGCGCGCACCTCGGTTATGTAGAACTGTGAAACGA	3´	NA
DSCAM-v5-4-7	5´	/5Phos/CGTAATTGTCCGAAAAGGACAAGAACCCCAGGCCTCATAGAACTGATTGACAA	3´	NA
DSCAM-v5-4-6	5´	/5Phos/CATAGTTCTCAGAGGGACGCAGTTACACATGGCGCCGTAAAACTGATTCACAA	3´	NA
DSCAM-v5-4-5	5´	/5Phos/CAAAATCCTCTTCCGGAGCGTACGGCGCCAAGCCTCGTAATACTGATTCACGA	3´	NA
DSCAM-v5-4-4	5´	/5Phos/CCGTTCCCTGTTGATCGCCTAGGGTTGGCCCGATTCATAGAACTGCTGCACAA	3´	NA
DSCAM-v5-4-3	5´	/5Phos/CGTATTCGCTGCCTGGCAGAAAACACCGCGGTGTCGTAGTATTGGGCAACGA	3´	NA
DSCAM-v5-4-2	5´	/5Phos/CATATTCAGTGCCTGGATAGAAATTTTCTCCTCTTCGTAGTGTTGGGAAACGA	3´	NA
DSCAM-v5-4-12	5´	/5Phos/CGCTTTCCGCGATATCCTCCTGTCAATCTTGACGGTGTATGATTGTGGCACAA	3´	NA
DSCAM-v5-4-11	5´	/5Phos/CAGTTATGTTCTTCGTGAAGACCTCCGCTATGACTCGAAAAACTGCTTCACCA	3´	NA
DSCAM-v5-4-10	5´	/5Phos/CAACGGAGTCGTCCGGGAGGACCGATTCGTGTCTGGTAGAACTGGTGGACAA	3´	NA
DSCAM-v5-4-1	5´	/5Phos/CGTATTCCGCGCCCGGAAAGGCCCCGAGCCTCGTAGTACTGGGCAACCA	3´	NA
Dscam.v8.E9.33-IC	5´	/5Phos/CATTCACAGTTAGCCTGGTCCGTCATGATTGGCGAGAGCATAGGTGGTT	3´	NA
DSCAM.v8.E9.29-IC	5´	/5Phos/CTATCACACGCAGCTGGGTGCTAAGGCTGGGCGTGATTTGTGGCAAGA	3´	NA
DSCAM.v8.E9.28-IC	5´	/5Phos/CGTTGACAATCAGGGCCGCAGGAAGGACTCAAAAGGACTGATATGGGGAGGTA	3´	NA
DSCAM.v8.E9.27-IC	5´	/5Phos/CATTGACTGTCAACTGTGCTGTGTCCATGGCAGTGTGCAATTTTGGGGGCAA	3´	NA
DSCAM.v8.E9.22-IC	5´	/5Phos/CATTCACAATCAACTCAGTAGTGTAGTTGAATACGTGGAAAGGTGTGATTTTCGGGGGAA	3´	NA
DSCAM.v8.E9.10-IC	5´	/5Phos/CATTGACCATCAGTTCAGCACTCTGTAACTGGGGGCATAACCTGAGGGGGCA	3´	NA
DSCAM.v8.E6.47-IC	5´	/5Phos/CTAAATGCGGGTGTGGGAAACGATCAACTTTTGGGAGATACACTACCCATCTGAA	3´	NA
DSCAM.v8.E6.45-IC	5´	/5Phos/CTTATCAATGGCACTGGATACGCCGACCAGCGGTCCCTTAGCACTAACGGGTT	3´	NA
DSCAM.v8.E6.44-IC	5´	/5Phos/CGTGTATAGGGAACTGGAAAAGCCCTCAAGGAGCCTTGGAGCCCACGGGCT	3´	NA
DSCAM.v8.E6.41-IC	5´	/5Phos/CTCATTATGGGCAGTGGAAAAGCCGTCAATCTGCTCTGGCACCAATGGGCT	3´	NA
DSCAM.v8.E6.40-IC	5´	/5Phos/CTAATGATGGGAACGGGGAACGCCGCTATGAGCTTTCGCCCCAACGGGCT	3´	NA
DSCAM.v8.E6.38-IC	5´	/5Phos/CTATAAATGGGCACCGGAAATGCTGTCTCAAGAGCCTTGGAACCAATGGGTT	3´	NA
DSCAM.v8.E6.31-IC	5´	/5Phos/CTAAAACTTGGCGCAGGATAGCCTTCTCCTAGCAGTGCTGGAAACCGGCT	3´	NA
DSCAM.v8.E6.29-IC	5´	/5Phos/CTAAAAGCTGGCACGGGAAAACCCACACGCGGGAGCAGCACCACTAATAGGTT	3´	NA
DSCAM.v8.E6.17-IC	5´	/5Phos/CGAGCGCTTGGCATGGGAAAACCAGCCGGCCACACTGCCAACAGGTT	3´	NA
DSCAM.v8.E6.13-IC	5´	/5Phos/CTAACGACCGGAACTGGATATGCCAACTGGCTGGCACAGAGCCAATGGGTT	3´	NA
DSCAM.v8.E6.11-IC	5´	/5Phos/CTACAAGCGGGAAGGGGATATGGGCCGGTCTAATAGAATAATCACTTAAACAGCAGTGTC	3´	NA
DSCAM.v8.E9.9-IC	5´	/5Phos/CATTAACTTGTAATTCAGCTACATATTCACTGGGTAATGTGGGCAAAACCTGGGGCGGCA	3´	V5_w_diff_code
DSCAM.v8.E9.6-IC	5´	/5Phos/CATTGACTTGCAGGTCAGCGGTTAATTGGGGCAGGACATGGGGAGGTA	3´	V5_w_diff_code
DSCAM.v8.E6.30-IC	5´	/5Phos/CTAAACACAGGCACCGGGTAGCGCCCCGATGGGTACAGCACTGCTTATAGGTT	3´	V5_w_diff_code
DSCAM.v8.E6.1-IC	5´	/5Phos/CTAAAAAGGGGAGCTGGATAAGCCTCCTTCCGCGAAACTCTGCCAACTGGTT	3´	V5_w_diff_code
DSCAM.v8.E4.12-IC	5´	/5Phos/CGCTTTCCGCGATATCCTCCTCTCCTCTGACGGTGTATGATTGTGGCACAA	3´	V5_w_diff_code
DSCAM.v8.E4.1-IC	5´	/5Phos/CGTATTCCGCGCCCGGAAAGAAGGAAGCCTCGTAGTACTGGGCAACCA	3´	V5_w_diff_code
DSCAM:V3:E5=6	5´	/5Phos/CTGTGATGACCAATCGTCCTTTTGTACTACTCAGAGGGCAATACCAGGTACTTTCCAT	3´	Exon5 Connector
DSCAM:V3:E7=8	5´	/5Phos/CCATGACTTGCACTTCCAGAGATCCACTACTGGTTGTTCCTTCGATGAACTTGTACCAT	3´	Exon7:8 Connector
DSCAM.v8.SenseAmp	5´	ATCTGAGCGGGCTGGCAAGGC	3´	Dscam Sense
DSCAM.v8.AntiAmp	5´	TCTGATGGCGCGAGGGAGGC	3´	Dscam Antisense
Dscam:HTS-BC-Primer-Sense-XX	5´	AATGATACGGCGACCACCGAGATCTACACTCTTTCCCTACACGACGCTCTTCCGATCT	3´	Sense Big primer for illumina workup
Dscam:HTS-barcode–01	5´	CAAGCAGAAGACGGCATACGAGATCGTGATGTGACTGGAGTTCAGACGTGTGCTCTTCCGATCT	3´	Big primer for illumina, antisense, barcode1
Dscam:HTS-barcode–02	5´	CAAGCAGAAGACGGCATACGAGATACATCGGTGACTGGAGTTCAGACGTGTGCTCTTCCGATCT	3´	Big primer for illumina, antisense, barcode2
Dscam:HTS-barcode–03	5´	CAAGCAGAAGACGGCATACGAGATGCCTAAGTGACTGGAGTTCAGACGTGTGCTCTTCCGATCT	3´	Big primer for illumina, antisense, barcode3
Dscam:HTS-barcode–04	5´	CAAGCAGAAGACGGCATACGAGATTGGTCAGTGACTGGAGTTCAGACGTGTGCTCTTCCGATCT	3´	Big primer for illumina, antisense, barcode4
Dscam:HTS-barcode–05	5´	CAAGCAGAAGACGGCATACGAGATCACTGTGTGACTGGAGTTCAGACGTGTGCTCTTCCGATCT	3´	Big primer for illumina, antisense, barcode5
Dscam:HTS-barcode–06	5´	CAAGCAGAAGACGGCATACGAGATATTGGCGTGACTGGAGTTCAGACGTGTGCTCTTCCGATCT	3´	Big primer for illumina, antisense, barcode6
Dscam:HTS-barcode–07	5´	CAAGCAGAAGACGGCATACGAGATGATCTGGTGACTGGAGTTCAGACGTGTGCTCTTCCGATCT	3´	Big primer for illumina, antisense, barcode7
Dscam:HTS-barcode–08	5´	CAAGCAGAAGACGGCATACGAGATTCAAGTGTGACTGGAGTTCAGACGTGTGCTCTTCCGATCT	3´	Big primer for illumina, antisense, barcode8
Dscam:HTS-barcode–09	5´	CAAGCAGAAGACGGCATACGAGATCTGATCGTGACTGGAGTTCAGACGTGTGCTCTTCCGATCT	3´	Big primer for illumina, antisense, barcode9
Dscam:HTS-barcode–10	5´	CAAGCAGAAGACGGCATACGAGATAAGCTAGTGACTGGAGTTCAGACGTGTGCTCTTCCGATCT	3´	Big primer for illumina, antisense, barcode10
Dscam:HTS-barcode–11	5´	CAAGCAGAAGACGGCATACGAGATGTAGCCGTGACTGGAGTTCAGACGTGTGCTCTTCCGATCT	3´	Big primer for illumina, antisense, barcode11
Dscam:HTS-barcode–12	5´	CAAGCAGAAGACGGCATACGAGATTACAAGGTGACTGGAGTTCAGACGTGTGCTCTTCCGATCT	3´	Big primer for illumina, antisense, barcode12
Dsc:sense-HTS:HIV:adapt	5´	CTACACGACGCTCTTCCGATCTATCTGAGCGGGCTGGCAAGGC	3´	Illumina then HIV Sense Sequences
Dsc:Anti-HTS:HIV:adapt	5´	AGACGTGTGCTCTTCCGATCTTCTGATGGCGCGAGGGAGGC	3´	Illumain then HIV Antisense sequences

## Sheet: Dscam_Variable_Ligamer_Regions
Exon Number	Pool 1 - 5´ Sequence	Poo 1 Barcode	Pool 1 - 3´ Sequence	Pool 2 - 5´ Sequence	Pool 2 Barcode	Pool 2 - 3´ Sequence
4.c.1	CGTATTCCGCGCCCGGAAAG	GCCCCGA	GCCTCGTAGTACTGGGCAACCA	CGTATTCCGCGCCCGGAAAG	AAGGAAG	CCTCGTAGTACTGGGCAACCA
4.c.2	CATATTCAGTGCCTGGATAGAAATT	TTCTCCT	CTTCGTAGTGTTGGGAAACGA	CATATTCAGTGCCTGGATAGAAATT	TTCTCCT	CTTCGTAGTGTTGGGAAACGA
4.c.3	CGTATTCGCTGCCTGGCAGAA	AACACCG	CGGTGTCGTAGTATTGGGCAACGA	CGTATTCGCTGCCTGGCAGAA	AACACCG	CGGTGTCGTAGTATTGGGCAACGA
4.c.4	CCGTTCCCTGTTGATCGCCTAG	GGTTGGC	CCGATTCATAGAACTGCTGCACAA	CCGTTCCCTGTTGATCGCCTAG	GGTTGGC	CCGATTCATAGAACTGCTGCACAA
4.c.5	CAAAATCCTCTTCCGGAGCGTAC	GGCGCCA	AGCCTCGTAATACTGATTCACGA	CAAAATCCTCTTCCGGAGCGTAC	GGCGCCA	AGCCTCGTAATACTGATTCACGA
4.c.6	CATAGTTCTCAGAGGGACGCAGT	TACACAT	GGCGCCGTAAAACTGATTCACAA	CATAGTTCTCAGAGGGACGCAGT	TACACAT	GGCGCCGTAAAACTGATTCACAA
4.c.7	CGTAATTGTCCGAAAAGGACAAGA	ACCCCAG	GCCTCATAGAACTGATTGACAA	CGTAATTGTCCGAAAAGGACAAGA	ACCCCAG	GCCTCATAGAACTGATTGACAA
4.c.8	CATAGGCGTCGGTGGCATTG	CGCGCAC	CTCGGTTATGTAGAACTGTGAAACGA	CATAGGCGTCGGTGGCATTG	CGCGCAC	CTCGGTTATGTAGAACTGTGAAACGA
4.c.9	CCGTCTCTGCGGCATTGTTC	GTCTCAA	CTCCGATTCATAGCTTTGGATGACCA	CCGTCTCTGCGGCATTGTTC	GTCTCAA	CTCCGATTCATAGCTTTGGATGACCA
4.c.10	CAACGGAGTCGTCCGGGAGG	ACCGATT	CGTGTCTGGTAGAACTGGTGGACAA	CAACGGAGTCGTCCGGGAGG	ACCGATT	CGTGTCTGGTAGAACTGGTGGACAA
4.c.11	CAGTTATGTTCTTCGTGAAGACCTC	CGCTATG	ACTCGAAAAACTGCTTCACCA	CAGTTATGTTCTTCGTGAAGACCTC	CGCTATG	ACTCGAAAAACTGCTTCACCA
4.c.12	CGCTTTCCGCGATATCCTCCT	GTCAATC	TTGACGGTGTATGATTGTGGCACAA	CGCTTTCCGCGATATCCTCCT	CTCCTCT	GACGGTGTATGATTGTGGCACAA
6.c.1	CTAAAAAGGGGAGCTGGATAAGCCT	TTCCTTC	GCGAAACTCTGCCAACTGGTT	CTAAAAAGGGGAGCTGGATAAGCC	TCCTTCC	GCGAAACTCTGCCAACTGGTT
6.c.2	CTAAAGACTGGCACTGGATATGATTGAG	AACGTTA	CCACACTCGCAATGGGTT	CTAAAGACTGGCACTGGATATGATTGAG	AACGTTA	CCACACTCGCAATGGGTT
6.c.3	CTAAAGAAGGGCACCGGATAAGCC	CGCATGT	GGTCCAATACTGCCAACAGGCT	CTAAAGAAGGGCACCGGATAAGCC	CGCATGT	GGTCCAATACTGCCAACAGGCT
6.c.4	CTAAAGAAGGGCACTGGATAGGCTT	GTCCTGG	GACTTACACTTCCGACCGGTT	CTAAAGAAGGGCACTGGATAGGCTT	GTCCTGG	GACTTACACTTCCGACCGGTT
6.c.5	CTATACACCGGCACGGGATAAGCT	TACGTGC	CCCAACGCTGCCAACGGGTT	CTATACACCGGCACGGGATAAGCT	TACGTGC	CCCAACGCTGCCAACGGGTT
6.c.6	CTAAAGAAAGGCTGTGGATACGCTTGA	ACCTTGA	CTGACTGTGCCAACAGGCT	CTAAAGAAAGGCTGTGGATACGCTTGA	ACCTTGA	CTGACTGTGCCAACAGGCT
6.c.7	CTAGATATTGGCTGTGGATATGCCT	CTCCTCT	GACTGACGCTACCAATTGGTT	CTAGATATTGGCTGTGGATATGCCT	CTCCTCT	GACTGACGCTACCAATTGGTT
6.c.8	TTGAAAACAGGCATGGGATACGATTGT	GACGTCG	GCCACACTGCCAACGGGTT	TTGAAAACAGGCATGGGATACGATTGT	GACGTCG	GCCACACTGCCAACGGGTT
6.c.9	CTGAAGGACGGGGTAGGATACGAC	TCCTTCC	TCGGACACTGCCCACGGGTT	CTGAAGGACGGGGTAGGATACGAC	TCCTTCC	TCGGACACTGCCCACGGGTT
6.c.10	CTGTGGGCTGGAATCGGATATGACT	AGCATCA	GCTTGACAGAGCCAACGGGTT	CTGTGGGCTGGAATCGGATATGACT	AGCATCA	GCTTGACAGAGCCAACGGGTT
6.c.11	CTACAAGCGGGAAGGGGATATG	GCCCCGA	TGGGTACAGCACTGCTTATAGGTT	CTACAAGCGGGAAGGGGATATG	GCCCCGA	TGGGTACAGCACTGCTTATAGGTT
6.c.12	CTGTTAATGGGTACTGGAAATGCCTGA	CACGTAT	GGAACCGAAGCTACGGGCT	CTGTTAATGGGTACTGGAAATGCCTGA	CACGTAT	GGAACCGAAGCTACGGGCT
6.c.13	CTAACGACCGGAACTGGATATGCC	GCCCCGA	TGGGTACAGCACTGCTTATAGGTT	CTAACGACCGGAACTGGATATGCC	GCCCCGA	TGGGTACAGCACTGCTTATAGGTT
6.c.14	CTAACAATTGGCACCGGGTATGCC	GCCTTAG	GGCGGAACAGATCCAATGGGTT	CTAACAATTGGCACCGGGTATGCC	GCCTTAG	GGCGGAACAGATCCAATGGGTT
6.c.15	CTAAAGAACGGCATTGGATACGACTGA	TGCATAC	GCCACTGAGCCTACGGGTT	CTAAAGAACGGCATTGGATACGACTGA	TGCATAC	GCCACTGAGCCTACGGGTT
6.c.16	CGGAAGGCAGGCACTGGATAAG	ATCCTAA	GGCCACACTACCGACGGGTT	CGGAAGGCAGGCACTGGATAAG	ATCCTAA	GGCCACACTACCGACGGGTT
6.c.17	CGAGCGCTTGGCATGGGAAA	ACCAGCC	GGCCACACTGCCAACAGGTT	CGAGCGCTTGGCATGGGAAA	ACCAGCC	GGCCACACTGCCAACAGGTT
6.c.18	CTATAAACTGGCATGGGATACGACTGA	GCCAGTT	GCTACACTGCCCACAGGTT	CTATAAACTGGCATGGGATACGACTGA	GCCAGTT	GCTACACTGCCCACAGGTT
6.c.19	CTAAATGCCGGCATAGGAAATCCTTGC	TGCCGTG	GCAACACTGCCCACGGGTT	CTAAATGCCGGCATAGGAAATCCTTGC	TGCCGTG	GCAACACTGCCCACGGGTT
6.c.20	CTAAACGCTGGCATTGGATAACCTT	ATCGGTC	GTGCCACACTACCAACAGGTT	CTAAACGCTGGCATTGGATAACCTT	ATCGGTC	GTGCCACACTACCAACAGGTT
6.c.21	CTAAAAGCTGGGATTGGATACGATTGA	CACTGTA	CCCACACTGCCAACGGGCT	CTAAAAGCTGGGATTGGATACGATTGA	CACTGTA	CCCACACTGCCAACGGGCT
6.c.22	CTATAAACCGGAACCGGAAAGGCC	GGCCGGT	GGAGCAACACTACCAATGGGTT	CTATAAACCGGAACCGGAAAGGCC	GGCCGGT	GGAGCAACACTACCAATGGGTT
6.c.23	CTATAAACGGGCACTGGAAAGGACTG	TTCGGGG	CGCCACACTTCCAACGGGCT	CTATAAACGGGCACTGGAAAGGACTG	TTCGGGG	CGCCACACTTCCAACGGGCT
6.c.24	CTATAGAAGGGCACGGGGTAGGC	AACTGGC	TGCCACGCTGCCCACGGGCT	CTATAGAAGGGCACGGGGTAGGC	AACTGGC	TGCCACGCTGCCCACGGGCT
6.c.25	CTGAATGCAGGAACCGGATAGGATTG	CCCAGGA	CTGCACACTACCCACAGGCT	CTGAATGCAGGAACCGGATAGGATTG	CCCAGGA	CTGCACACTACCCACAGGCT
6.c.26	CTAAACGATGGTACCGGATACGATTGA	GTCGGCT	CCTACACTGCCAACGGGCT	CTAAACGATGGTACCGGATACGATTGA	GTCGGCT	CCTACACTGCCAACGGGCT
6.c.27	CTAAAGAAGGGTACTGGATAGGCTTGA	TACTGCG	GCAACACTGCCCACAGGTT	CTAAAGAAGGGTACTGGATAGGCTTGA	TACTGCG	GCAACACTGCCCACAGGTT
6.c.28	CTGAAGAATGGTACCGGATATGCCTG	ACCAGCC	ACCCACACTTCCCACAGGCT	CTGAAGAATGGTACCGGATATGCCTG	ACCAGCC	ACCCACACTTCCCACAGGCT
6.c.29	CTAAAAGCTGGCACGGGAAAACC	CACACGC	GGGAGCAGCACCACTAATAGGTT	CTAAAAGCTGGCACGGGAAAACC	CACACGC	GGGAGCAGCACCACTAATAGGTT
6.c.30	CTAAACACAGGCACCGGGTAGC	CGCCGCA	TGGGTACAGCACTGCTTATAGGTT	CTAAACACAGGCACCGGGTAGC	GCCCCGA	TGGGTACAGCACTGCTTATAGGTT
6.c.31	CTAAAACTTGGCGCAGGATAGCC	TTCTCCT	AGCAGTGCTGGAAACCGGCT	CTAAAACTTGGCGCAGGATAGCC	TTCTCCT	AGCAGTGCTGGAAACCGGCT
6.c.32	CTAAAACTAGGAGCTGGATAGCCTTGG	GACTGAT	GGACTACTGCTAACGGGCT	CTAAAACTAGGAGCTGGATAGCCTTGG	GACTGAT	GGACTACTGCTAACGGGCT
6.c.33	CTAAAGGCGGGAACTGGAAATCCC	TCCAGAG	AGCTTTACCGCCGACGGGTT	CTAAAGGCGGGAACTGGAAATCCC	TCCAGAG	AGCTTTACCGCCGACGGGTT
6.c.34	CGAAAACTAGGAGCCGGAAAGCC	AGCCGAC	GGGAGCACTGCTCGAAATAGGCT	CGAAAACTAGGAGCCGGAAAGCC	AGCCGAC	GGGAGCACTGCTCGAAATAGGCT
6.c.35	CTGCTAATGGGCACCGGATATGC	CTCGGAA	CGCCTTGGCCGAGATGGGCT	CTGCTAATGGGCACCGGATATGC	CTCGGAA	CGCCTTGGCCGAGATGGGCT
6.c.36	CTAATGATGGGCACTGGAAAGGCT	TCCCCTT	GGCCTTGGCGCCAACGGGCT	CTAATGATGGGCACTGGAAAGGCT	TCCCCTT	GGCCTTGGCGCCAACGGGCT
6.c.37	CTAAAAACTGGCACCGGAAATGC	AGCGCTG	CGGAGCCTTGGAACCAATAGGTT	CTAAAAACTGGCACCGGAAATGC	AGCGCTG	CGGAGCCTTGGAACCAATAGGTT
6.c.38	CTATAAATGGGCACCGGAAATGCT	GTCTCAA	GAGCCTTGGAACCAATGGGTT	CTATAAATGGGCACCGGAAATGCT	GTCTCAA	GAGCCTTGGAACCAATGGGTT
6.c.39	TTAAATATTGGTACAGGATAGGATTGG	CTCTCTC	GCCTTAAATCCCACAGGCT	TTAAATATTGGTACAGGATAGGATTGG	CTCTCTC	GCCTTAAATCCCACAGGCT
6.c.40	CTAATGATGGGAACGGGGAACGC	CGCTATG	AGCTTTCGCCCCAACGGGCT	CTAATGATGGGAACGGGGAACGC	CGCTATG	AGCTTTCGCCCCAACGGGCT
6.c.41	CTCATTATGGGCAGTGGAAAAGCC	GTCAATC	TGCTCTGGCACCAATGGGCT	CTCATTATGGGCAGTGGAAAAGCC	GTCAATC	TGCTCTGGCACCAATGGGCT
6.c.42	CTCATAATGGGAACTGGATATGCCTGAG	GACACTA	CTCTTGCCCCGATGGGCT	CTCATAATGGGAACTGGATATGCCTGAG	GACACTA	CTCTTGCCCCGATGGGCT
6.c.43	CTCATAGCGGGAACTGGATAGGCC	TGCGCGT	AGCCCTGGCGCCAATGGGTT	CTCATAGCGGGAACTGGATAGGCC	TGCGCGT	AGCCCTGGCGCCAATGGGTT
6.c.44	CGTGTATAGGGAACTGGAAAAGCC	CTCAAGG	AGCCTTGGAGCCCACGGGCT	CGTGTATAGGGAACTGGAAAAGCC	CTCAAGG	AGCCTTGGAGCCCACGGGCT
6.c.45	CTTATCAATGGCACTGGATACGCC	GACCAGC	GGTCCCTTAGCACTAACGGGTT	CTTATCAATGGCACTGGATACGCC	GACCAGC	GGTCCCTTAGCACTAACGGGTT
6.c.46	CTGATAATGGGTACTGGAAAAGCCTGC	ATCTCGG	GCTTTGGCGCCAACTGGCT	CTGATAATGGGTACTGGAAAAGCCTGC	ATCTCGG	GCTTTGGCGCCAACTGGCT
6.c.47	CTAAATGCGGGTGTGGGAAACG	ATCAACT	TTTGGGAGATACACTACCCATCTGAA	CTAAATGCGGGTGTGGGAAACG	ATCAACT	TTTGGGAGATACACTACCCATCTGAA
6.c.48	CTAAACACTGGATGCGGATACGCT	CACACGC	GGAGCTACACTACCAATGGGTT	CTAAACACTGGATGCGGATACGCT	CACACGC	GGAGCTACACTACCAATGGGTT
9.c.1	CGTTAACGCGCAGCTCTGCC	CAGCCGA	GGGTACGACCTGCGGTGGAA	CGTTAACGCGCAGCTCTGCC	CAGCCGA	GGGTACGACCTGCGGTGGAA
9.c.2	CATTGACGGCCAGGACTGCC	GGGTCCT	GGGCACGATCTGGGGCAGAA	CATTGACGGCCAGGACTGCC	GGGTCCT	GGGCACGATCTGGGGCAGAA
9.c.3	CATTCACTGCTAGCATGGCGGA	TTGACCG	GGGCACGACCTGGGGTAAGA	CATTCACTGCTAGCATGGCGGA	TTGACCG	GGGCACGACCTGGGGTAAGA
9.c.4	CATTGACAGCTAGGATGGCGGAC	AAGCCCC	GAAGGGCATTATTTGGGGCAGGA	CATTGACAGCTAGGATGGCGGAC	AAGCCCC	GAAGGGCATTATTTGGGGCAGGA
9.c.5	CGTTGACTTTCAGCTCCGATGTTGT	CCGGCCA	CGGCGCTATCGACGGTGGAA	CGTTGACTTTCAGCTCCGATGTTGT	CCGGCCA	CGGCGCTATCGACGGTGGAA
9.c.6	CATTGACTTGCAGGTCAGCGGA	GTGACAT	GGGCAGGACATGGGGAGGTA	CATTGACTTGCAGGTCAGCGG	TTAATTG	GGGCAGGACATGGGGAGGTA
9.c.7	CGTTGACATCTAGTGTGGAAACGTAT	TAGCCAG	GGGGCTAATCTGTGGTGCAA	CGTTGACATCTAGTGTGGAAACGTAT	TAGCCAG	GGGGCTAATCTGTGGTGCAA
9.c.8	CATTCACGTGCAATTCAGCGCTG	ACGGCAC	AAACGCTTGGATTTGGGGAGGAA	CATTCACGTGCAATTCAGCGCTG	ACGGCAC	AAACGCTTGGATTTGGGGAGGAA
9.c.9	CATTAACTTGTAATTCAGCTACATATTCA	CGGTCAA	CAAAACCTGGGGCGGCA	CATTAACTTGTAATTCAGCTACATATTCACTGG	GTAATGT	GGGCAAAACCTGGGGCGGCA
9.c.10	CATTGACCATCAGTTCAGCACTCTG	TAACTGG	GGGCATAACCTGAGGGGGCA	CATTGACCATCAGTTCAGCACTCTG	TAACTGG	GGGCATAACCTGAGGGGGCA
9.c.11	CGTTGACTTTCAACTCAGCACTGTAG	TAGGATT	GGGTCGAATTTGTGGAGGCA	CGTTGACTTTCAACTCAGCACTGTAG	TAGGATT	GGGTCGAATTTGTGGAGGCA
9.c.12	CATTGACGAGCAGCTCGGCG	ACGTATG	CGGATGGATGCTGGGCAGGA	CATTGACGAGCAGCTCGGCG	ACGTATG	CGGATGGATGCTGGGCAGGA
9.c.13	CGTTCACTGTCAGGTCAACGCTATAT	CGGAATC	GGGCACAATTTGGGGCAGAA	CGTTCACTGTCAGGTCAACGCTATAT	CGGAATC	GGGCACAATTTGGGGCAGAA
9.c.14	CATTCACGATCAGCCGCGCC	GTGCATA	AGGACGCTATCTTGGGAGCCA	CATTCACGATCAGCCGCGCC	GTGCATA	AGGACGCTATCTTGGGAGCCA
9.c.15	CATTAACTTTCAACTCGGCCGTG	TCGTAGT	AAAGGGACTTATCTTTGGCAGTG	CATTAACTTTCAACTCGGCCGTG	TCGTAGT	AAAGGGACTTATCTTTGGCAGTG
9.c.16	CATTCACCACCAGTTCGGCGG	AGGAAGG	TGGGGCAATTTTCGGAGCCA	CATTCACCACCAGTTCGGCGG	AGGAAGG	TGGGGCAATTTTCGGAGCCA
9.c.17	CATTCACAATCAATTCAGCCGAGTATT	CTGCAGC	TGGGCGATTTTTGGTGGCA	CATTCACAATCAATTCAGCCGAGTATT	CTGCAGC	TGGGCGATTTTTGGTGGCA
9.c.18	CGTTCACAATCAGGGCCGCT	GAGGAGA	AGGGCGCAATTTTCGGTGGTG	CGTTCACAATCAGGGCCGCT	GAGGAGA	AGGGCGCAATTTTCGGTGGTG
9.c.19	CGTTCACAATTAAATCGGTGGTGTAGT	TGGAACT	GGAGTGATCTTGGGTGGAG	CGTTCACAATTAAATCGGTGGTGTAGT	TGGAACT	GGAGTGATCTTGGGTGGAG
9.c.20	CGTTCACAATCAAGCTGGTGGT	ATGCACG	CAAAGGGAGTAATCTTTGGGGGAA	CGTTCACAATCAAGCTGGTGGT	ATGCACG	CAAAGGGAGTAATCTTTGGGGGAA
9.c.21	CGTTCACTACGAGATCGAAGGTGTA	CAGGACC	AGGGTGTGATTTTCGGGGGAA	CGTTCACTACGAGATCGAAGGTGTA	CAGGACC	AGGGTGTGATTTTCGGGGGAA
9.c.22	CATTCACAATCAACTCAGTAGTGTAGTTGA	ATACGTG	GAAAGGTGTGATTTTCGGGGGAA	CATTCACAATCAACTCAGTAGTGTAGTTGA	ATACGTG	GAAAGGTGTGATTTTCGGGGGAA
9.c.23	CATTCACAATCAACTCGGTTGTGAA	GCGTACA	AGGGAGTGATTTTAGGAGGAA	CATTCACAATCAACTCGGTTGTGAA	GCGTACA	AGGGAGTGATTTTAGGAGGAA
9.c.24	CATTGACAATAAGGGCCGCCGA	TTGCAAT	AAGGAGCAAGTTTCGGTGGGG	CATTGACAATAAGGGCCGCCGA	TTGCAAT	AAGGAGCAAGTTTCGGTGGGG
9.c.25	CATTAACTATTAGTTCGGTGGTATAA	AAGGAAG	GGGCGTAATTTTGGGTGGAA	CATTAACTATTAGTTCGGTGGTATAA	AAGGAAG	GGGCGTAATTTTGGGTGGAA
9.c.26	CATTAACTATGAGTTCAGTGCTGTAGT	CCGTAAC	GGCGTGATTTTCGGAGGAA	CATTAACTATGAGTTCAGTGCTGTAGT	CCGTAAC	GGCGTGATTTTCGGAGGAA
9.c.27	CATTGACTGTCAACTGTGCTGTGT	CCATGGC	AGTGTGCAATTTTGGGGGCAA	CATTGACTGTCAACTGTGCTGTGT	CCATGGC	AGTGTGCAATTTTGGGGGCAA
9.c.28	CGTTGACAATCAGGGCCGCA	GGAAGGA	CTCAAAAGGACTGATATGGGGAGGTA	CGTTGACAATCAGGGCCGCA	GGAAGGA	CTCAAAAGGACTGATATGGGGAGGTA
9.c.29	CTATCACACGCAGCTGGGTGC	TAAGGCT	GGGCGTGATTTGTGGCAAGA	CTATCACACGCAGCTGGGTGC	TAAGGCT	GGGCGTGATTTGTGGCAAGA
9.c.30	CGTAGACGTTCAGCGGCGTG	GGGAAAA	CGAAGGGTATGATGCGCGGAAGAA	CGTAGACGTTCAGCGGCGTG	GGGAAAA	CGAAGGGTATGATGCGCGGAAGAA
9.c.31	CCTTGACACTCAGGTGGGTCTCA	CCCTTTT	GGGAGCCAGTTTGGGGGGCA	CCTTGACACTCAGGTGGGTCTCA	CCCTTTT	GGGAGCCAGTTTGGGGGGCA
9.c.32	CCTTCACTTTCAGGATGGACCAGC	GGCATTG	ACTGATCAACCTGGGGCAGCT	CCTTCACTTTCAGGATGGACCAGC	GGCATTG	ACTGATCAACCTGGGGCAGCT
9.c.33	CATTCACAGTTAGCCTGGTCCG	TCATGAT	TGGCGAGAGCATAGGTGGTT	CATTCACAGTTAGCCTGGTCCG	TCATGAT	TGGCGAGAGCATAGGTGGTT
