# Supplementary material for: Assessing long-distance RNA sequence connectivity via RNA-templated DNA–DNA ligation
Source: eLife. 2015 Apr 13;4:e03700. doi: 10.7554/eLife.03700 (PMC4442144; doi:10.7554/eLife.03700)
Supplement: Supplementary file 2. — Sequencing statistics. DOI: http://dx.doi.org/10.7554/eLife.03700.018 [file elife03700s002.xlsx]

## Sheet: Sheet1
Exp Number	Experiment ID	Sample Type	Sample Name	Biological or Technical Replicate	Raw Sequencing Reads	Raw Peared Reads	Filtered and High Quality Alignments	Unique Isoforms	Lig Pool	Barcode
01	e12-75	Spikes	spikes	B	410752	398460	50549	3067	1&2	1
02	e12-62	S2	s2-1	T	1766300	1749168	269518	1444	1	3
03	e12-62	S2	s2-2	T	4225196	4166080	640390	2686	2	4
04	e12-75	S2	s2-5	B	2016064	1957412	112498	1438	1&2	2
05	e12-62	4_6hr	4-6-1	T	4087316	3978356	612307	3012	1	5
06	e12-62	4_6hr	4-6-2	T	2152368	2130348	335443	2538	1&2	6
07	e12-75	4_6hr	4-6-5	B	504888	490924	65251	2350	1	3
08	e12-62	14_16hr	14-16	B	2256660	2208428	346506	5168	1	7
09	e12-75	14_16hr	14-16-4	B	1518820	1475424	222098	3972	1	4
