# Supplementary material for: Assessing long-distance RNA sequence connectivity via RNA-templated DNA–DNA ligation
Source: eLife. 2015 Apr 13;4:e03700. doi: 10.7554/eLife.03700 (PMC4442144; doi:10.7554/eLife.03700)
Supplement: Supplementary file 3. — Ligamer folding energies. DOI: http://dx.doi.org/10.7554/eLife.03700.019 [file elife03700s003.xls]

## Sheet: Exon4LigamerFoldingEn
exon	ligamer	energy
E4.00	L4.00	-72
E4.00	L4.01	-45.6
E4.00	L4.02	-50.9
E4.00	L4.03	-31.6
E4.00	L4.04	-36.4
E4.00	L4.05	-24.3
E4.00	L4.06	-22.9
E4.00	L4.07	-30.4
E4.00	L4.08	-27.2
E4.00	L4.09	-38.1
E4.00	L4.10	-26.4
E4.00	L4.11	-33.7
E4.01	L4.00	-29.5
E4.01	L4.01	-68.5
E4.01	L4.02	-41.8
E4.01	L4.03	-22.1
E4.01	L4.04	-18.7
E4.01	L4.05	-18.8
E4.01	L4.06	-13.9
E4.01	L4.07	-26.2
E4.01	L4.08	-23.5
E4.01	L4.09	-25.5
E4.01	L4.10	-14.2
E4.01	L4.11	-24.5
E4.02	L4.00	-39.2
E4.02	L4.01	-39.9
E4.02	L4.02	-74.7
E4.02	L4.03	-38.1
E4.02	L4.04	-24.7
E4.02	L4.05	-25
E4.02	L4.06	-22.7
E4.02	L4.07	-31.9
E4.02	L4.08	-21.8
E4.02	L4.09	-33.4
E4.02	L4.10	-18.5
E4.02	L4.11	-29.4
E4.03	L4.00	-30.1
E4.03	L4.01	-33.9
E4.03	L4.02	-31.2
E4.03	L4.03	-75.5
E4.03	L4.04	-30.3
E4.03	L4.05	-26.1
E4.03	L4.06	-29.7
E4.03	L4.07	-37.2
E4.03	L4.08	-33.9
E4.03	L4.09	-37.3
E4.03	L4.10	-29.3
E4.03	L4.11	-31
E4.04	L4.00	-42.3
E4.04	L4.01	-33.9
E4.04	L4.02	-41.2
E4.04	L4.03	-36.6
E4.04	L4.04	-73
E4.04	L4.05	-32.6
E4.04	L4.06	-33.3
E4.04	L4.07	-37
E4.04	L4.08	-32.5
E4.04	L4.09	-34.5
E4.04	L4.10	-25.5
E4.04	L4.11	-26.1
E4.05	L4.00	-23.4
E4.05	L4.01	-22.4
E4.05	L4.02	-32.6
E4.05	L4.03	-37.5
E4.05	L4.04	-37.6
E4.05	L4.05	-71.9
E4.05	L4.06	-29.8
E4.05	L4.07	-33.3
E4.05	L4.08	-26.3
E4.05	L4.09	-32.2
E4.05	L4.10	-29.1
E4.05	L4.11	-33.8
E4.06	L4.00	-27.5
E4.06	L4.01	-24.3
E4.06	L4.02	-21.8
E4.06	L4.03	-34.7
E4.06	L4.04	-33.4
E4.06	L4.05	-29.1
E4.06	L4.06	-68.6
E4.06	L4.07	-35.8
E4.06	L4.08	-32.7
E4.06	L4.09	-40.4
E4.06	L4.10	-23.7
E4.06	L4.11	-22.4
E4.07	L4.00	-30.2
E4.07	L4.01	-26.3
E4.07	L4.02	-32.2
E4.07	L4.03	-41.6
E4.07	L4.04	-29.2
E4.07	L4.05	-26.3
E4.07	L4.06	-33.8
E4.07	L4.07	-75.3
E4.07	L4.08	-37.6
E4.07	L4.09	-35.2
E4.07	L4.10	-26.4
E4.07	L4.11	-36.4
E4.08	L4.00	-25.9
E4.08	L4.01	-24.2
E4.08	L4.02	-27.5
E4.08	L4.03	-32.7
E4.08	L4.04	-27.4
E4.08	L4.05	-28.3
E4.08	L4.06	-22.7
E4.08	L4.07	-31.8
E4.08	L4.08	-74.5
E4.08	L4.09	-33.9
E4.08	L4.10	-23.4
E4.08	L4.11	-27.6
E4.09	L4.00	-36.7
E4.09	L4.01	-22.8
E4.09	L4.02	-28.3
E4.09	L4.03	-40.8
E4.09	L4.04	-34.9
E4.09	L4.05	-29.7
E4.09	L4.06	-24.8
E4.09	L4.07	-39.2
E4.09	L4.08	-38.9
E4.09	L4.09	-81.5
E4.09	L4.10	-29.6
E4.09	L4.11	-40.4
E4.10	L4.00	-22.8
E4.10	L4.01	-20.8
E4.10	L4.02	-34.4
E4.10	L4.03	-37.6
E4.10	L4.04	-28.1
E4.10	L4.05	-26.4
E4.10	L4.06	-21.7
E4.10	L4.07	-38.3
E4.10	L4.08	-29.1
E4.10	L4.09	-34.1
E4.10	L4.10	-71.1
E4.10	L4.11	-24.5
E4.11	L4.00	-36.6
E4.11	L4.01	-31.3
E4.11	L4.02	-34.6
E4.11	L4.03	-38.6
E4.11	L4.04	-35.9
E4.11	L4.05	-24.4
E4.11	L4.06	-22.5
E4.11	L4.07	-26.7
E4.11	L4.08	-27.4
E4.11	L4.09	-32.3
E4.11	L4.10	-31.3
E4.11	L4.11	-72.9

## Sheet: Exon6LigamerFoldingEn
exon	ligamer	energy
E6.00	L6.00	-73.6
E6.00	L6.01	-22.9
E6.00	L6.02	-35.8
E6.00	L6.03	-36.5
E6.00	L6.04	-34.4
E6.00	L6.05	-30.9
E6.00	L6.06	-31.9
E6.00	L6.07	-32.1
E6.00	L6.08	-33.4
E6.00	L6.09	-30.2
E6.00	L6.10	-26.6
E6.00	L6.11	-31.6
E6.00	L6.12	-34.4
E6.00	L6.13	-30.8
E6.00	L6.14	-23.6
E6.00	L6.15	-26.3
E6.00	L6.16	-35
E6.00	L6.17	-32.1
E6.00	L6.18	-32.4
E6.00	L6.19	-22.9
E6.00	L6.20	-26.4
E6.00	L6.21	-26.5
E6.00	L6.22	-33
E6.00	L6.23	-32.5
E6.00	L6.24	-21.6
E6.00	L6.25	-26.4
E6.00	L6.26	-41.3
E6.00	L6.27	-24.2
E6.00	L6.28	-19.8
E6.00	L6.29	-28.2
E6.00	L6.30	-33.8
E6.00	L6.31	-43
E6.00	L6.32	-31.5
E6.00	L6.33	-30.5
E6.00	L6.34	-28
E6.00	L6.35	-31.5
E6.00	L6.36	-28.2
E6.00	L6.37	-33
E6.00	L6.38	-24.7
E6.00	L6.39	-31.8
E6.00	L6.40	-33.1
E6.00	L6.41	-34.9
E6.00	L6.42	-40.6
E6.00	L6.43	-33.8
E6.00	L6.44	-23.1
E6.00	L6.45	-41.8
E6.00	L6.46	-27.1
E6.00	L6.47	-24.3
E6.01	L6.00	-25.8
E6.01	L6.01	-70.7
E6.01	L6.02	-34.7
E6.01	L6.03	-47.4
E6.01	L6.04	-34.9
E6.01	L6.05	-30.1
E6.01	L6.06	-29.1
E6.01	L6.07	-35
E6.01	L6.08	-27.1
E6.01	L6.09	-31.6
E6.01	L6.10	-27
E6.01	L6.11	-33.8
E6.01	L6.12	-40.6
E6.01	L6.13	-41.4
E6.01	L6.14	-36.6
E6.01	L6.15	-37.6
E6.01	L6.16	-30.8
E6.01	L6.17	-31.7
E6.01	L6.18	-26.9
E6.01	L6.19	-40.1
E6.01	L6.20	-42.9
E6.01	L6.21	-29.3
E6.01	L6.22	-43.1
E6.01	L6.23	-35
E6.01	L6.24	-28.3
E6.01	L6.25	-43.1
E6.01	L6.26	-39.8
E6.01	L6.27	-35
E6.01	L6.28	-33.6
E6.01	L6.29	-31.7
E6.01	L6.30	-29.7
E6.01	L6.31	-30.1
E6.01	L6.32	-35.1
E6.01	L6.33	-24.7
E6.01	L6.34	-34.4
E6.01	L6.35	-34.9
E6.01	L6.36	-32.3
E6.01	L6.37	-30
E6.01	L6.38	-33.5
E6.01	L6.39	-25.8
E6.01	L6.40	-27.3
E6.01	L6.41	-35.5
E6.01	L6.42	-35.9
E6.01	L6.43	-33.5
E6.01	L6.44	-36.3
E6.01	L6.45	-32.7
E6.01	L6.46	-22.1
E6.01	L6.47	-40.9
E6.02	L6.00	-44
E6.02	L6.01	-37.4
E6.02	L6.02	-78.6
E6.02	L6.03	-55.9
E6.02	L6.04	-47.6
E6.02	L6.05	-43.7
E6.02	L6.06	-27.7
E6.02	L6.07	-41.4
E6.02	L6.08	-36.6
E6.02	L6.09	-34.4
E6.02	L6.10	-28.1
E6.02	L6.11	-38
E6.02	L6.12	-38.5
E6.02	L6.13	-44.4
E6.02	L6.14	-40.2
E6.02	L6.15	-38.7
E6.02	L6.16	-42.5
E6.02	L6.17	-45.2
E6.02	L6.18	-37.6
E6.02	L6.19	-37.6
E6.02	L6.20	-39.1
E6.02	L6.21	-42.2
E6.02	L6.22	-47.9
E6.02	L6.23	-54.5
E6.02	L6.24	-36.8
E6.02	L6.25	-55
E6.02	L6.26	-62.4
E6.02	L6.27	-52.4
E6.02	L6.28	-33
E6.02	L6.29	-43.9
E6.02	L6.30	-33.4
E6.02	L6.31	-42.6
E6.02	L6.32	-37.5
E6.02	L6.33	-42.4
E6.02	L6.34	-44.3
E6.02	L6.35	-46.5
E6.02	L6.36	-39.1
E6.02	L6.37	-35
E6.02	L6.38	-33.9
E6.02	L6.39	-38.1
E6.02	L6.40	-35.8
E6.02	L6.41	-42.8
E6.02	L6.42	-44
E6.02	L6.43	-36
E6.02	L6.44	-39.7
E6.02	L6.45	-47.8
E6.02	L6.46	-28.1
E6.02	L6.47	-34.2
E6.03	L6.00	-32.2
E6.03	L6.01	-42.1
E6.03	L6.02	-46.2
E6.03	L6.03	-81.9
E6.03	L6.04	-32.9
E6.03	L6.05	-37.8
E6.03	L6.06	-31.4
E6.03	L6.07	-31.1
E6.03	L6.08	-32.1
E6.03	L6.09	-30.6
E6.03	L6.10	-27.8
E6.03	L6.11	-38.5
E6.03	L6.12	-33.6
E6.03	L6.13	-31.9
E6.03	L6.14	-45.3
E6.03	L6.15	-38.2
E6.03	L6.16	-30.6
E6.03	L6.17	-33
E6.03	L6.18	-33.7
E6.03	L6.19	-30.3
E6.03	L6.20	-31.9
E6.03	L6.21	-32.3
E6.03	L6.22	-43.9
E6.03	L6.23	-50.8
E6.03	L6.24	-31.9
E6.03	L6.25	-38.7
E6.03	L6.26	-58
E6.03	L6.27	-38
E6.03	L6.28	-26.6
E6.03	L6.29	-30.2
E6.03	L6.30	-26.7
E6.03	L6.31	-36.2
E6.03	L6.32	-35.5
E6.03	L6.33	-29.4
E6.03	L6.34	-32.6
E6.03	L6.35	-44.3
E6.03	L6.36	-28
E6.03	L6.37	-29.3
E6.03	L6.38	-26.7
E6.03	L6.39	-25.7
E6.03	L6.40	-30.8
E6.03	L6.41	-38.4
E6.03	L6.42	-37.9
E6.03	L6.43	-29.3
E6.03	L6.44	-32
E6.03	L6.45	-34.9
E6.03	L6.46	-27.5
E6.03	L6.47	-36.8
E6.04	L6.00	-46.9
E6.04	L6.01	-35.7
E6.04	L6.02	-45.8
E6.04	L6.03	-38.8
E6.04	L6.04	-77.5
E6.04	L6.05	-30.6
E6.04	L6.06	-37.2
E6.04	L6.07	-49.4
E6.04	L6.08	-42.2
E6.04	L6.09	-39.1
E6.04	L6.10	-28.8
E6.04	L6.11	-32.1
E6.04	L6.12	-39.4
E6.04	L6.13	-35.9
E6.04	L6.14	-32.5
E6.04	L6.15	-37.8
E6.04	L6.16	-41.4
E6.04	L6.17	-44.7
E6.04	L6.18	-53.9
E6.04	L6.19	-42.2
E6.04	L6.20	-43.5
E6.04	L6.21	-43.2
E6.04	L6.22	-41.6
E6.04	L6.23	-54.5
E6.04	L6.24	-26.5
E6.04	L6.25	-44.5
E6.04	L6.26	-38.7
E6.04	L6.27	-28
E6.04	L6.28	-33.4
E6.04	L6.29	-37.9
E6.04	L6.30	-29.6
E6.04	L6.31	-37.4
E6.04	L6.32	-35.6
E6.04	L6.33	-26.8
E6.04	L6.34	-36.6
E6.04	L6.35	-45.7
E6.04	L6.36	-33.1
E6.04	L6.37	-34.2
E6.04	L6.38	-38.4
E6.04	L6.39	-33.8
E6.04	L6.40	-31.4
E6.04	L6.41	-38.5
E6.04	L6.42	-41.3
E6.04	L6.43	-29.5
E6.04	L6.44	-38.4
E6.04	L6.45	-32.7
E6.04	L6.46	-29.2
E6.04	L6.47	-39.7
E6.05	L6.00	-33.5
E6.05	L6.01	-32.7
E6.05	L6.02	-43.2
E6.05	L6.03	-42.7
E6.05	L6.04	-27.3
E6.05	L6.05	-73.9
E6.05	L6.06	-37.5
E6.05	L6.07	-34.7
E6.05	L6.08	-34.1
E6.05	L6.09	-38.8
E6.05	L6.10	-24
E6.05	L6.11	-25.8
E6.05	L6.12	-34.7
E6.05	L6.13	-28.2
E6.05	L6.14	-38.5
E6.05	L6.15	-31.5
E6.05	L6.16	-36.1
E6.05	L6.17	-35.7
E6.05	L6.18	-34.8
E6.05	L6.19	-33.7
E6.05	L6.20	-37.7
E6.05	L6.21	-23.9
E6.05	L6.22	-36
E6.05	L6.23	-42.8
E6.05	L6.24	-28
E6.05	L6.25	-40.2
E6.05	L6.26	-46.1
E6.05	L6.27	-33.2
E6.05	L6.28	-29.6
E6.05	L6.29	-25.6
E6.05	L6.30	-26.6
E6.05	L6.31	-39.8
E6.05	L6.32	-32
E6.05	L6.33	-26.6
E6.05	L6.34	-27.5
E6.05	L6.35	-40
E6.05	L6.36	-28.2
E6.05	L6.37	-24.6
E6.05	L6.38	-30.1
E6.05	L6.39	-32.9
E6.05	L6.40	-29.6
E6.05	L6.41	-33.3
E6.05	L6.42	-35.2
E6.05	L6.43	-35.2
E6.05	L6.44	-32.6
E6.05	L6.45	-41.2
E6.05	L6.46	-19.2
E6.05	L6.47	-29.2
E6.06	L6.00	-31.2
E6.06	L6.01	-26.8
E6.06	L6.02	-24.8
E6.06	L6.03	-30.8
E6.06	L6.04	-31.5
E6.06	L6.05	-42.8
E6.06	L6.06	-69.4
E6.06	L6.07	-25.7
E6.06	L6.08	-25.9
E6.06	L6.09	-35.2
E6.06	L6.10	-26.1
E6.06	L6.11	-30.7
E6.06	L6.12	-32.8
E6.06	L6.13	-33.6
E6.06	L6.14	-24.6
E6.06	L6.15	-28.1
E6.06	L6.16	-27.6
E6.06	L6.17	-27.8
E6.06	L6.18	-26.9
E6.06	L6.19	-25.3
E6.06	L6.20	-25.6
E6.06	L6.21	-26.8
E6.06	L6.22	-23.3
E6.06	L6.23	-28.3
E6.06	L6.24	-27.8
E6.06	L6.25	-23.5
E6.06	L6.26	-28.3
E6.06	L6.27	-29.6
E6.06	L6.28	-22.6
E6.06	L6.29	-22.9
E6.06	L6.30	-29.3
E6.06	L6.31	-37.1
E6.06	L6.32	-19.5
E6.06	L6.33	-24.2
E6.06	L6.34	-32.5
E6.06	L6.35	-27.7
E6.06	L6.36	-28.3
E6.06	L6.37	-24.2
E6.06	L6.38	-26.5
E6.06	L6.39	-18.5
E6.06	L6.40	-27.1
E6.06	L6.41	-35.1
E6.06	L6.42	-30.7
E6.06	L6.43	-26.7
E6.06	L6.44	-28.8
E6.06	L6.45	-31.1
E6.06	L6.46	-22.5
E6.06	L6.47	-32.2
E6.07	L6.00	-34.7
E6.07	L6.01	-39.2
E6.07	L6.02	-36.1
E6.07	L6.03	-38.2
E6.07	L6.04	-45.9
E6.07	L6.05	-34.2
E6.07	L6.06	-30.9
E6.07	L6.07	-75.2
E6.07	L6.08	-40
E6.07	L6.09	-40.1
E6.07	L6.10	-31.4
E6.07	L6.11	-27.8
E6.07	L6.12	-43.5
E6.07	L6.13	-37.7
E6.07	L6.14	-41.7
E6.07	L6.15	-46.3
E6.07	L6.16	-44.9
E6.07	L6.17	-48.6
E6.07	L6.18	-40.2
E6.07	L6.19	-40.1
E6.07	L6.20	-52.3
E6.07	L6.21	-35.3
E6.07	L6.22	-55.2
E6.07	L6.23	-49.4
E6.07	L6.24	-35.9
E6.07	L6.25	-54.3
E6.07	L6.26	-34.7
E6.07	L6.27	-32.1
E6.07	L6.28	-29
E6.07	L6.29	-35.3
E6.07	L6.30	-19.9
E6.07	L6.31	-34.7
E6.07	L6.32	-36.6
E6.07	L6.33	-29.1
E6.07	L6.34	-31.2
E6.07	L6.35	-37.8
E6.07	L6.36	-28.8
E6.07	L6.37	-30
E6.07	L6.38	-23.8
E6.07	L6.39	-31.2
E6.07	L6.40	-33.3
E6.07	L6.41	-32.5
E6.07	L6.42	-34.1
E6.07	L6.43	-35.5
E6.07	L6.44	-32.4
E6.07	L6.45	-38.4
E6.07	L6.46	-36.5
E6.07	L6.47	-43.1
E6.08	L6.00	-30.6
E6.08	L6.01	-31.4
E6.08	L6.02	-33.6
E6.08	L6.03	-36.3
E6.08	L6.04	-38.6
E6.08	L6.05	-28.8
E6.08	L6.06	-23.9
E6.08	L6.07	-46.1
E6.08	L6.08	-79.9
E6.08	L6.09	-42.2
E6.08	L6.10	-29.9
E6.08	L6.11	-27.1
E6.08	L6.12	-35.3
E6.08	L6.13	-30
E6.08	L6.14	-45.7
E6.08	L6.15	-32.8
E6.08	L6.16	-35.2
E6.08	L6.17	-54
E6.08	L6.18	-52.6
E6.08	L6.19	-27
E6.08	L6.20	-42.8
E6.08	L6.21	-31.2
E6.08	L6.22	-33.6
E6.08	L6.23	-53.9
E6.08	L6.24	-36.4
E6.08	L6.25	-47.5
E6.08	L6.26	-41.4
E6.08	L6.27	-38.1
E6.08	L6.28	-25.3
E6.08	L6.29	-37.1
E6.08	L6.30	-28.1
E6.08	L6.31	-40.3
E6.08	L6.32	-30.4
E6.08	L6.33	-35.4
E6.08	L6.34	-25.8
E6.08	L6.35	-29.8
E6.08	L6.36	-21.7
E6.08	L6.37	-21.9
E6.08	L6.38	-27.7
E6.08	L6.39	-31.9
E6.08	L6.40	-27
E6.08	L6.41	-33.2
E6.08	L6.42	-37.3
E6.08	L6.43	-38.1
E6.08	L6.44	-27.9
E6.08	L6.45	-29.3
E6.08	L6.46	-35.8
E6.08	L6.47	-32.7
E6.09	L6.00	-28.4
E6.09	L6.01	-29
E6.09	L6.02	-24.7
E6.09	L6.03	-29.2
E6.09	L6.04	-32.5
E6.09	L6.05	-30.8
E6.09	L6.06	-25.9
E6.09	L6.07	-41.3
E6.09	L6.08	-39.2
E6.09	L6.09	-78.4
E6.09	L6.10	-27.9
E6.09	L6.11	-31.9
E6.09	L6.12	-44.6
E6.09	L6.13	-36.6
E6.09	L6.14	-35.6
E6.09	L6.15	-32.9
E6.09	L6.16	-34.6
E6.09	L6.17	-31.4
E6.09	L6.18	-39.3
E6.09	L6.19	-27.5
E6.09	L6.20	-43.2
E6.09	L6.21	-38
E6.09	L6.22	-35
E6.09	L6.23	-30.5
E6.09	L6.24	-32.3
E6.09	L6.25	-41.2
E6.09	L6.26	-26.5
E6.09	L6.27	-26.8
E6.09	L6.28	-21.8
E6.09	L6.29	-23.8
E6.09	L6.30	-21.8
E6.09	L6.31	-33.9
E6.09	L6.32	-32.3
E6.09	L6.33	-23.5
E6.09	L6.34	-32.3
E6.09	L6.35	-37.7
E6.09	L6.36	-30.1
E6.09	L6.37	-31.3
E6.09	L6.38	-21.3
E6.09	L6.39	-29.2
E6.09	L6.40	-29.4
E6.09	L6.41	-32.3
E6.09	L6.42	-43
E6.09	L6.43	-28.8
E6.09	L6.44	-33.9
E6.09	L6.45	-31.4
E6.09	L6.46	-21.2
E6.09	L6.47	-35.9
E6.10	L6.00	-24.8
E6.10	L6.01	-25.5
E6.10	L6.02	-21.2
E6.10	L6.03	-23.1
E6.10	L6.04	-19.4
E6.10	L6.05	-17.4
E6.10	L6.06	-18.9
E6.10	L6.07	-24.4
E6.10	L6.08	-21.6
E6.10	L6.09	-24.9
E6.10	L6.10	-79.6
E6.10	L6.11	-23.9
E6.10	L6.12	-29.8
E6.10	L6.13	-23.7
E6.10	L6.14	-19.2
E6.10	L6.15	-20.5
E6.10	L6.16	-24.4
E6.10	L6.17	-25.5
E6.10	L6.18	-20
E6.10	L6.19	-22.3
E6.10	L6.20	-26.4
E6.10	L6.21	-22
E6.10	L6.22	-32.3
E6.10	L6.23	-31.1
E6.10	L6.24	-23.8
E6.10	L6.25	-27
E6.10	L6.26	-23
E6.10	L6.27	-21
E6.10	L6.28	-28.8
E6.10	L6.29	-18.9
E6.10	L6.30	-21.5
E6.10	L6.31	-24.9
E6.10	L6.32	-22.7
E6.10	L6.33	-22.2
E6.10	L6.34	-26.7
E6.10	L6.35	-25.6
E6.10	L6.36	-20.2
E6.10	L6.37	-28.6
E6.10	L6.38	-27.2
E6.10	L6.39	-24.8
E6.10	L6.40	-25.2
E6.10	L6.41	-32.8
E6.10	L6.42	-29.5
E6.10	L6.43	-22.5
E6.10	L6.44	-21.4
E6.10	L6.45	-25.8
E6.10	L6.46	-27.6
E6.10	L6.47	-21.7
E6.11	L6.00	-31
E6.11	L6.01	-23.2
E6.11	L6.02	-28.9
E6.11	L6.03	-38.1
E6.11	L6.04	-31.1
E6.11	L6.05	-26.7
E6.11	L6.06	-28.2
E6.11	L6.07	-27.7
E6.11	L6.08	-30.6
E6.11	L6.09	-36.3
E6.11	L6.10	-19.3
E6.11	L6.11	-77.9
E6.11	L6.12	-31.1
E6.11	L6.13	-31.5
E6.11	L6.14	-31.7
E6.11	L6.15	-25.9
E6.11	L6.16	-26.8
E6.11	L6.17	-30.6
E6.11	L6.18	-35.4
E6.11	L6.19	-24.3
E6.11	L6.20	-31.5
E6.11	L6.21	-30.9
E6.11	L6.22	-47.5
E6.11	L6.23	-38.6
E6.11	L6.24	-32.1
E6.11	L6.25	-29.1
E6.11	L6.26	-43.8
E6.11	L6.27	-45.8
E6.11	L6.28	-22
E6.11	L6.29	-27.9
E6.11	L6.30	-27.6
E6.11	L6.31	-34.4
E6.11	L6.32	-35.2
E6.11	L6.33	-23.9
E6.11	L6.34	-42.1
E6.11	L6.35	-41.4
E6.11	L6.36	-28.4
E6.11	L6.37	-35
E6.11	L6.38	-24.5
E6.11	L6.39	-32.5
E6.11	L6.40	-31.6
E6.11	L6.41	-47.6
E6.11	L6.42	-38.7
E6.11	L6.43	-41.8
E6.11	L6.44	-39
E6.11	L6.45	-52.5
E6.11	L6.46	-21
E6.11	L6.47	-27.2
E6.12	L6.00	-31.5
E6.12	L6.01	-36.6
E6.12	L6.02	-25.4
E6.12	L6.03	-33.4
E6.12	L6.04	-28.9
E6.12	L6.05	-27.4
E6.12	L6.06	-28.3
E6.12	L6.07	-29.1
E6.12	L6.08	-25.8
E6.12	L6.09	-45.6
E6.12	L6.10	-25.5
E6.12	L6.11	-34.5
E6.12	L6.12	-76.9
E6.12	L6.13	-45.3
E6.12	L6.14	-36.6
E6.12	L6.15	-26
E6.12	L6.16	-28.7
E6.12	L6.17	-25.7
E6.12	L6.18	-31.4
E6.12	L6.19	-31.7
E6.12	L6.20	-33.9
E6.12	L6.21	-44.7
E6.12	L6.22	-32.7
E6.12	L6.23	-25.8
E6.12	L6.24	-31.3
E6.12	L6.25	-27.7
E6.12	L6.26	-31.6
E6.12	L6.27	-36
E6.12	L6.28	-29.3
E6.12	L6.29	-26.9
E6.12	L6.30	-22.8
E6.12	L6.31	-39.1
E6.12	L6.32	-39
E6.12	L6.33	-32.6
E6.12	L6.34	-32.3
E6.12	L6.35	-37
E6.12	L6.36	-30.5
E6.12	L6.37	-28
E6.12	L6.38	-18.8
E6.12	L6.39	-34.4
E6.12	L6.40	-29.1
E6.12	L6.41	-45.6
E6.12	L6.42	-45.3
E6.12	L6.43	-32.6
E6.12	L6.44	-29.9
E6.12	L6.45	-34.6
E6.12	L6.46	-19.3
E6.12	L6.47	-34.1
E6.13	L6.00	-28
E6.13	L6.01	-27.7
E6.13	L6.02	-31.5
E6.13	L6.03	-38.1
E6.13	L6.04	-27.9
E6.13	L6.05	-24.2
E6.13	L6.06	-33.8
E6.13	L6.07	-25.4
E6.13	L6.08	-27.2
E6.13	L6.09	-30.2
E6.13	L6.10	-24.6
E6.13	L6.11	-36.4
E6.13	L6.12	-42.6
E6.13	L6.13	-84.1
E6.13	L6.14	-20.4
E6.13	L6.15	-26
E6.13	L6.16	-26.9
E6.13	L6.17	-28.3
E6.13	L6.18	-30.5
E6.13	L6.19	-24.3
E6.13	L6.20	-22.4
E6.13	L6.21	-40
E6.13	L6.22	-38.1
E6.13	L6.23	-35.5
E6.13	L6.24	-36.2
E6.13	L6.25	-28.2
E6.13	L6.26	-27.5
E6.13	L6.27	-37.7
E6.13	L6.28	-29.9
E6.13	L6.29	-38.8
E6.13	L6.30	-32.4
E6.13	L6.31	-35.2
E6.13	L6.32	-25
E6.13	L6.33	-29.7
E6.13	L6.34	-36.7
E6.13	L6.35	-35
E6.13	L6.36	-42
E6.13	L6.37	-40.9
E6.13	L6.38	-21.2
E6.13	L6.39	-24.4
E6.13	L6.40	-29.9
E6.13	L6.41	-37.1
E6.13	L6.42	-37.2
E6.13	L6.43	-25.6
E6.13	L6.44	-34.2
E6.13	L6.45	-37.2
E6.13	L6.46	-20.8
E6.13	L6.47	-32.3
E6.14	L6.00	-33.1
E6.14	L6.01	-39.7
E6.14	L6.02	-37.8
E6.14	L6.03	-40.3
E6.14	L6.04	-36.1
E6.14	L6.05	-37.6
E6.14	L6.06	-25.6
E6.14	L6.07	-42.4
E6.14	L6.08	-46.8
E6.14	L6.09	-35.8
E6.14	L6.10	-25.9
E6.14	L6.11	-29.2
E6.14	L6.12	-40.3
E6.14	L6.13	-29.6
E6.14	L6.14	-75.1
E6.14	L6.15	-32.9
E6.14	L6.16	-30.1
E6.14	L6.17	-42.3
E6.14	L6.18	-36
E6.14	L6.19	-31.4
E6.14	L6.20	-41
E6.14	L6.21	-30.1
E6.14	L6.22	-37.3
E6.14	L6.23	-42.5
E6.14	L6.24	-26.1
E6.14	L6.25	-48
E6.14	L6.26	-36
E6.14	L6.27	-38.2
E6.14	L6.28	-27.4
E6.14	L6.29	-30.7
E6.14	L6.30	-26
E6.14	L6.31	-41.5
E6.14	L6.32	-32.8
E6.14	L6.33	-28.8
E6.14	L6.34	-30.4
E6.14	L6.35	-38.2
E6.14	L6.36	-33.9
E6.14	L6.37	-32.1
E6.14	L6.38	-27.9
E6.14	L6.39	-31.9
E6.14	L6.40	-34
E6.14	L6.41	-33.1
E6.14	L6.42	-40.3
E6.14	L6.43	-41.5
E6.14	L6.44	-37.9
E6.14	L6.45	-34.1
E6.14	L6.46	-25.8
E6.14	L6.47	-32.9
E6.15	L6.00	-33.3
E6.15	L6.01	-41.4
E6.15	L6.02	-37.8
E6.15	L6.03	-46.3
E6.15	L6.04	-37.4
E6.15	L6.05	-30.1
E6.15	L6.06	-27
E6.15	L6.07	-50.2
E6.15	L6.08	-43.2
E6.15	L6.09	-36.2
E6.15	L6.10	-22.6
E6.15	L6.11	-30.3
E6.15	L6.12	-36.5
E6.15	L6.13	-35.1
E6.15	L6.14	-42.1
E6.15	L6.15	-75.6
E6.15	L6.16	-38.6
E6.15	L6.17	-42.1
E6.15	L6.18	-39.2
E6.15	L6.19	-44.5
E6.15	L6.20	-43.3
E6.15	L6.21	-39
E6.15	L6.22	-52.7
E6.15	L6.23	-47.7
E6.15	L6.24	-40.8
E6.15	L6.25	-43.1
E6.15	L6.26	-42.8
E6.15	L6.27	-32.9
E6.15	L6.28	-28.8
E6.15	L6.29	-36.3
E6.15	L6.30	-26.2
E6.15	L6.31	-37.6
E6.15	L6.32	-41.2
E6.15	L6.33	-27.5
E6.15	L6.34	-33.8
E6.15	L6.35	-42.3
E6.15	L6.36	-29.3
E6.15	L6.37	-28.1
E6.15	L6.38	-32.1
E6.15	L6.39	-28.2
E6.15	L6.40	-35.8
E6.15	L6.41	-38.1
E6.15	L6.42	-47.2
E6.15	L6.43	-32.5
E6.15	L6.44	-37.8
E6.15	L6.45	-41.8
E6.15	L6.46	-42.4
E6.15	L6.47	-43.7
E6.16	L6.00	-41.1
E6.16	L6.01	-32.7
E6.16	L6.02	-38.6
E6.16	L6.03	-37.7
E6.16	L6.04	-40.6
E6.16	L6.05	-35.3
E6.16	L6.06	-28.2
E6.16	L6.07	-53.9
E6.16	L6.08	-38
E6.16	L6.09	-36.6
E6.16	L6.10	-28.8
E6.16	L6.11	-26.7
E6.16	L6.12	-37.4
E6.16	L6.13	-32.7
E6.16	L6.14	-29.7
E6.16	L6.15	-42.1
E6.16	L6.16	-68.1
E6.16	L6.17	-47.6
E6.16	L6.18	-41.8
E6.16	L6.19	-46
E6.16	L6.20	-42.5
E6.16	L6.21	-31.7
E6.16	L6.22	-48.9
E6.16	L6.23	-46.2
E6.16	L6.24	-33.1
E6.16	L6.25	-42.7
E6.16	L6.26	-41.3
E6.16	L6.27	-32.7
E6.16	L6.28	-39.9
E6.16	L6.29	-40.9
E6.16	L6.30	-26.4
E6.16	L6.31	-43.7
E6.16	L6.32	-33.9
E6.16	L6.33	-32.8
E6.16	L6.34	-29.7
E6.16	L6.35	-39.2
E6.16	L6.36	-30.9
E6.16	L6.37	-27.2
E6.16	L6.38	-29
E6.16	L6.39	-34.7
E6.16	L6.40	-25.8
E6.16	L6.41	-36
E6.16	L6.42	-37.4
E6.16	L6.43	-36.9
E6.16	L6.44	-29.5
E6.16	L6.45	-32.9
E6.16	L6.46	-31.7
E6.16	L6.47	-35.8
E6.17	L6.00	-37.4
E6.17	L6.01	-40.1
E6.17	L6.02	-35.4
E6.17	L6.03	-42.4
E6.17	L6.04	-39.6
E6.17	L6.05	-32.8
E6.17	L6.06	-26.1
E6.17	L6.07	-54.9
E6.17	L6.08	-46.8
E6.17	L6.09	-41.2
E6.17	L6.10	-26.4
E6.17	L6.11	-25.4
E6.17	L6.12	-36.1
E6.17	L6.13	-41.8
E6.17	L6.14	-45.9
E6.17	L6.15	-36.7
E6.17	L6.16	-47.2
E6.17	L6.17	-81.4
E6.17	L6.18	-44.3
E6.17	L6.19	-37.5
E6.17	L6.20	-45.9
E6.17	L6.21	-33.3
E6.17	L6.22	-45.3
E6.17	L6.23	-49.5
E6.17	L6.24	-38.6
E6.17	L6.25	-49.1
E6.17	L6.26	-47.8
E6.17	L6.27	-40.5
E6.17	L6.28	-36.2
E6.17	L6.29	-43.1
E6.17	L6.30	-25.3
E6.17	L6.31	-37.3
E6.17	L6.32	-32.2
E6.17	L6.33	-32.2
E6.17	L6.34	-30.9
E6.17	L6.35	-39.2
E6.17	L6.36	-35
E6.17	L6.37	-29.1
E6.17	L6.38	-34.5
E6.17	L6.39	-29.2
E6.17	L6.40	-28.3
E6.17	L6.41	-35.7
E6.17	L6.42	-32
E6.17	L6.43	-33.6
E6.17	L6.44	-31.8
E6.17	L6.45	-36.2
E6.17	L6.46	-36.3
E6.17	L6.47	-40.3
E6.18	L6.00	-25.1
E6.18	L6.01	-28.1
E6.18	L6.02	-31.2
E6.18	L6.03	-33.2
E6.18	L6.04	-43.8
E6.18	L6.05	-26.6
E6.18	L6.06	-21.5
E6.18	L6.07	-41.5
E6.18	L6.08	-46.9
E6.18	L6.09	-31.8
E6.18	L6.10	-26.8
E6.18	L6.11	-27
E6.18	L6.12	-28.3
E6.18	L6.13	-33.2
E6.18	L6.14	-34.8
E6.18	L6.15	-36.5
E6.18	L6.16	-37.5
E6.18	L6.17	-43.1
E6.18	L6.18	-80.7
E6.18	L6.19	-35.8
E6.18	L6.20	-33.5
E6.18	L6.21	-34.6
E6.18	L6.22	-36.3
E6.18	L6.23	-46.1
E6.18	L6.24	-36.1
E6.18	L6.25	-37.5
E6.18	L6.26	-40.2
E6.18	L6.27	-27
E6.18	L6.28	-36.6
E6.18	L6.29	-40.9
E6.18	L6.30	-25
E6.18	L6.31	-34.6
E6.18	L6.32	-36.5
E6.18	L6.33	-29.8
E6.18	L6.34	-28.6
E6.18	L6.35	-33.6
E6.18	L6.36	-36.1
E6.18	L6.37	-30.6
E6.18	L6.38	-23.6
E6.18	L6.39	-26.1
E6.18	L6.40	-25.2
E6.18	L6.41	-26.6
E6.18	L6.42	-33
E6.18	L6.43	-39.4
E6.18	L6.44	-25.8
E6.18	L6.45	-27.6
E6.18	L6.46	-43.8
E6.18	L6.47	-26.1
E6.19	L6.00	-29.4
E6.19	L6.01	-39.5
E6.19	L6.02	-41
E6.19	L6.03	-38.4
E6.19	L6.04	-41.6
E6.19	L6.05	-37.6
E6.19	L6.06	-35.4
E6.19	L6.07	-41.4
E6.19	L6.08	-29.7
E6.19	L6.09	-33.8
E6.19	L6.10	-22.8
E6.19	L6.11	-20.7
E6.19	L6.12	-34.6
E6.19	L6.13	-33
E6.19	L6.14	-36.1
E6.19	L6.15	-45.3
E6.19	L6.16	-54.5
E6.19	L6.17	-46.8
E6.19	L6.18	-47.7
E6.19	L6.19	-72.6
E6.19	L6.20	-47.5
E6.19	L6.21	-34.5
E6.19	L6.22	-42.4
E6.19	L6.23	-39.1
E6.19	L6.24	-36
E6.19	L6.25	-46.2
E6.19	L6.26	-42.4
E6.19	L6.27	-34.9
E6.19	L6.28	-42.9
E6.19	L6.29	-38.3
E6.19	L6.30	-33.5
E6.19	L6.31	-35.4
E6.19	L6.32	-32.6
E6.19	L6.33	-26.3
E6.19	L6.34	-28.4
E6.19	L6.35	-31.3
E6.19	L6.36	-37.1
E6.19	L6.37	-28.2
E6.19	L6.38	-24.3
E6.19	L6.39	-24.8
E6.19	L6.40	-24.2
E6.19	L6.41	-24.9
E6.19	L6.42	-29.9
E6.19	L6.43	-24.9
E6.19	L6.44	-31.8
E6.19	L6.45	-35.2
E6.19	L6.46	-36.1
E6.19	L6.47	-43.5
E6.20	L6.00	-33.7
E6.20	L6.01	-44
E6.20	L6.02	-45.6
E6.20	L6.03	-42.6
E6.20	L6.04	-42.5
E6.20	L6.05	-41.7
E6.20	L6.06	-29.3
E6.20	L6.07	-46.6
E6.20	L6.08	-45.2
E6.20	L6.09	-42.2
E6.20	L6.10	-29.9
E6.20	L6.11	-30.6
E6.20	L6.12	-38
E6.20	L6.13	-36.3
E6.20	L6.14	-36.2
E6.20	L6.15	-39.8
E6.20	L6.16	-42.4
E6.20	L6.17	-41
E6.20	L6.18	-39.7
E6.20	L6.19	-42.3
E6.20	L6.20	-75.7
E6.20	L6.21	-34.9
E6.20	L6.22	-48.8
E6.20	L6.23	-51.1
E6.20	L6.24	-32.7
E6.20	L6.25	-60.1
E6.20	L6.26	-36.3
E6.20	L6.27	-33.3
E6.20	L6.28	-32.1
E6.20	L6.29	-36.2
E6.20	L6.30	-30.8
E6.20	L6.31	-46.8
E6.20	L6.32	-36.2
E6.20	L6.33	-33.5
E6.20	L6.34	-35.7
E6.20	L6.35	-46.8
E6.20	L6.36	-29.1
E6.20	L6.37	-32.6
E6.20	L6.38	-30.4
E6.20	L6.39	-35
E6.20	L6.40	-36.4
E6.20	L6.41	-34.9
E6.20	L6.42	-39
E6.20	L6.43	-37.2
E6.20	L6.44	-36.3
E6.20	L6.45	-34.8
E6.20	L6.46	-31.2
E6.20	L6.47	-40.6
E6.21	L6.00	-33.6
E6.21	L6.01	-32.6
E6.21	L6.02	-31
E6.21	L6.03	-35.2
E6.21	L6.04	-37.3
E6.21	L6.05	-22.2
E6.21	L6.06	-28.8
E6.21	L6.07	-34.8
E6.21	L6.08	-34.1
E6.21	L6.09	-37.3
E6.21	L6.10	-25.3
E6.21	L6.11	-38.5
E6.21	L6.12	-46.7
E6.21	L6.13	-38.2
E6.21	L6.14	-21.1
E6.21	L6.15	-39.4
E6.21	L6.16	-29.7
E6.21	L6.17	-36.4
E6.21	L6.18	-41.9
E6.21	L6.19	-35.2
E6.21	L6.20	-34.1
E6.21	L6.21	-79.7
E6.21	L6.22	-51.6
E6.21	L6.23	-33.8
E6.21	L6.24	-34.3
E6.21	L6.25	-35.9
E6.21	L6.26	-39.4
E6.21	L6.27	-25.1
E6.21	L6.28	-41
E6.21	L6.29	-33.8
E6.21	L6.30	-20.9
E6.21	L6.31	-37.6
E6.21	L6.32	-34
E6.21	L6.33	-39.8
E6.21	L6.34	-27.5
E6.21	L6.35	-32.5
E6.21	L6.36	-37.1
E6.21	L6.37	-41.6
E6.21	L6.38	-17.7
E6.21	L6.39	-30
E6.21	L6.40	-29.4
E6.21	L6.41	-39.1
E6.21	L6.42	-46.3
E6.21	L6.43	-31.7
E6.21	L6.44	-25.9
E6.21	L6.45	-32.8
E6.21	L6.46	-34.1
E6.21	L6.47	-44.6
E6.22	L6.00	-35.5
E6.22	L6.01	-41.2
E6.22	L6.02	-40.6
E6.22	L6.03	-47.3
E6.22	L6.04	-40.6
E6.22	L6.05	-31
E6.22	L6.06	-28.9
E6.22	L6.07	-50.9
E6.22	L6.08	-33.9
E6.22	L6.09	-37.8
E6.22	L6.10	-31.2
E6.22	L6.11	-46.2
E6.22	L6.12	-37.2
E6.22	L6.13	-39.1
E6.22	L6.14	-44
E6.22	L6.15	-43.3
E6.22	L6.16	-37
E6.22	L6.17	-40.1
E6.22	L6.18	-44.5
E6.22	L6.19	-42.7
E6.22	L6.20	-45.7
E6.22	L6.21	-49.2
E6.22	L6.22	-88.8
E6.22	L6.23	-50.6
E6.22	L6.24	-34.6
E6.22	L6.25	-46
E6.22	L6.26	-34.2
E6.22	L6.27	-39.8
E6.22	L6.28	-31.1
E6.22	L6.29	-30.4
E6.22	L6.30	-24.2
E6.22	L6.31	-37.1
E6.22	L6.32	-35.9
E6.22	L6.33	-27.8
E6.22	L6.34	-40.3
E6.22	L6.35	-56.2
E6.22	L6.36	-29.6
E6.22	L6.37	-41.4
E6.22	L6.38	-31.9
E6.22	L6.39	-37.5
E6.22	L6.40	-46.4
E6.22	L6.41	-39.8
E6.22	L6.42	-43.5
E6.22	L6.43	-34.7
E6.22	L6.44	-36.7
E6.22	L6.45	-48.1
E6.22	L6.46	-29.3
E6.22	L6.47	-43.5
E6.23	L6.00	-32.6
E6.23	L6.01	-31.7
E6.23	L6.02	-47.6
E6.23	L6.03	-45.2
E6.23	L6.04	-47.8
E6.23	L6.05	-28.3
E6.23	L6.06	-28.5
E6.23	L6.07	-43.3
E6.23	L6.08	-52.2
E6.23	L6.09	-33.3
E6.23	L6.10	-23.4
E6.23	L6.11	-38.8
E6.23	L6.12	-30.6
E6.23	L6.13	-38.5
E6.23	L6.14	-39
E6.23	L6.15	-36.5
E6.23	L6.16	-33.7
E6.23	L6.17	-47.5
E6.23	L6.18	-43.2
E6.23	L6.19	-28.1
E6.23	L6.20	-46.4
E6.23	L6.21	-32.1
E6.23	L6.22	-48.5
E6.23	L6.23	-87.2
E6.23	L6.24	-36.6
E6.23	L6.25	-37
E6.23	L6.26	-52.6
E6.23	L6.27	-39.1
E6.23	L6.28	-29
E6.23	L6.29	-36.8
E6.23	L6.30	-36
E6.23	L6.31	-37.1
E6.23	L6.32	-30.6
E6.23	L6.33	-30.1
E6.23	L6.34	-32.4
E6.23	L6.35	-42.5
E6.23	L6.36	-25.1
E6.23	L6.37	-32.5
E6.23	L6.38	-32
E6.23	L6.39	-40.1
E6.23	L6.40	-30.7
E6.23	L6.41	-38.3
E6.23	L6.42	-40.7
E6.23	L6.43	-39.7
E6.23	L6.44	-29.9
E6.23	L6.45	-32.9
E6.23	L6.46	-24.9
E6.23	L6.47	-35.2
E6.24	L6.00	-37.5
E6.24	L6.01	-30.2
E6.24	L6.02	-42
E6.24	L6.03	-36.5
E6.24	L6.04	-38.3
E6.24	L6.05	-33.5
E6.24	L6.06	-32
E6.24	L6.07	-44.1
E6.24	L6.08	-46
E6.24	L6.09	-35.5
E6.24	L6.10	-33.6
E6.24	L6.11	-26.7
E6.24	L6.12	-36
E6.24	L6.13	-34.4
E6.24	L6.14	-35.8
E6.24	L6.15	-44.4
E6.24	L6.16	-44.1
E6.24	L6.17	-48
E6.24	L6.18	-47.4
E6.24	L6.19	-42.6
E6.24	L6.20	-42.8
E6.24	L6.21	-41.6
E6.24	L6.22	-44.2
E6.24	L6.23	-50.2
E6.24	L6.24	-82.1
E6.24	L6.25	-44.1
E6.24	L6.26	-47.3
E6.24	L6.27	-49.9
E6.24	L6.28	-39.1
E6.24	L6.29	-45.7
E6.24	L6.30	-30.5
E6.24	L6.31	-43.7
E6.24	L6.32	-35.1
E6.24	L6.33	-39.2
E6.24	L6.34	-37
E6.24	L6.35	-36
E6.24	L6.36	-34.1
E6.24	L6.37	-32.7
E6.24	L6.38	-40.7
E6.24	L6.39	-33.6
E6.24	L6.40	-27.9
E6.24	L6.41	-33.9
E6.24	L6.42	-46.8
E6.24	L6.43	-43.7
E6.24	L6.44	-31.1
E6.24	L6.45	-36.3
E6.24	L6.46	-36.6
E6.24	L6.47	-42.2
E6.25	L6.00	-32.7
E6.25	L6.01	-42.3
E6.25	L6.02	-51.5
E6.25	L6.03	-49.8
E6.25	L6.04	-44.9
E6.25	L6.05	-31.8
E6.25	L6.06	-28.9
E6.25	L6.07	-47.7
E6.25	L6.08	-37.6
E6.25	L6.09	-44.2
E6.25	L6.10	-25.3
E6.25	L6.11	-36
E6.25	L6.12	-39.9
E6.25	L6.13	-35.2
E6.25	L6.14	-36.8
E6.25	L6.15	-38.3
E6.25	L6.16	-47.5
E6.25	L6.17	-41.4
E6.25	L6.18	-38.8
E6.25	L6.19	-35.6
E6.25	L6.20	-52.2
E6.25	L6.21	-39.5
E6.25	L6.22	-49.2
E6.25	L6.23	-45.3
E6.25	L6.24	-44
E6.25	L6.25	-79.1
E6.25	L6.26	-40.7
E6.25	L6.27	-45.4
E6.25	L6.28	-33.5
E6.25	L6.29	-38.6
E6.25	L6.30	-25.2
E6.25	L6.31	-48.1
E6.25	L6.32	-35.2
E6.25	L6.33	-32.3
E6.25	L6.34	-37.5
E6.25	L6.35	-49.8
E6.25	L6.36	-29
E6.25	L6.37	-34.6
E6.25	L6.38	-34.5
E6.25	L6.39	-43.3
E6.25	L6.40	-31.8
E6.25	L6.41	-38.7
E6.25	L6.42	-38.9
E6.25	L6.43	-32.5
E6.25	L6.44	-37.3
E6.25	L6.45	-42.5
E6.25	L6.46	-30.3
E6.25	L6.47	-50.6
E6.26	L6.00	-39
E6.26	L6.01	-27.2
E6.26	L6.02	-46.9
E6.26	L6.03	-55.1
E6.26	L6.04	-32.9
E6.26	L6.05	-34.6
E6.26	L6.06	-24.1
E6.26	L6.07	-38
E6.26	L6.08	-42.1
E6.26	L6.09	-30.7
E6.26	L6.10	-23.9
E6.26	L6.11	-37.2
E6.26	L6.12	-30
E6.26	L6.13	-31.8
E6.26	L6.14	-39.4
E6.26	L6.15	-35.4
E6.26	L6.16	-40.9
E6.26	L6.17	-46.8
E6.26	L6.18	-42.1
E6.26	L6.19	-30.6
E6.26	L6.20	-34.3
E6.26	L6.21	-35.9
E6.26	L6.22	-40.4
E6.26	L6.23	-53.5
E6.26	L6.24	-41.5
E6.26	L6.25	-36.6
E6.26	L6.26	-76.6
E6.26	L6.27	-46.5
E6.26	L6.28	-27.7
E6.26	L6.29	-43.3
E6.26	L6.30	-22.6
E6.26	L6.31	-32.1
E6.26	L6.32	-35.5
E6.26	L6.33	-30.9
E6.26	L6.34	-26.3
E6.26	L6.35	-42
E6.26	L6.36	-24.9
E6.26	L6.37	-24.9
E6.26	L6.38	-34.6
E6.26	L6.39	-28.9
E6.26	L6.40	-24.5
E6.26	L6.41	-27.3
E6.26	L6.42	-39.7
E6.26	L6.43	-35.5
E6.26	L6.44	-31.8
E6.26	L6.45	-39.3
E6.26	L6.46	-28.4
E6.26	L6.47	-28.6
E6.27	L6.00	-28.2
E6.27	L6.01	-34.5
E6.27	L6.02	-42.6
E6.27	L6.03	-47.2
E6.27	L6.04	-33.6
E6.27	L6.05	-30
E6.27	L6.06	-31.6
E6.27	L6.07	-32.8
E6.27	L6.08	-40.7
E6.27	L6.09	-32.9
E6.27	L6.10	-25.4
E6.27	L6.11	-40.4
E6.27	L6.12	-40.7
E6.27	L6.13	-37.7
E6.27	L6.14	-29.1
E6.27	L6.15	-39.8
E6.27	L6.16	-34.9
E6.27	L6.17	-38.7
E6.27	L6.18	-43.8
E6.27	L6.19	-37.3
E6.27	L6.20	-40.1
E6.27	L6.21	-36.6
E6.27	L6.22	-50.3
E6.27	L6.23	-45.5
E6.27	L6.24	-48.2
E6.27	L6.25	-49.5
E6.27	L6.26	-47.9
E6.27	L6.27	-76.8
E6.27	L6.28	-30.8
E6.27	L6.29	-33.9
E6.27	L6.30	-27.4
E6.27	L6.31	-39
E6.27	L6.32	-26.5
E6.27	L6.33	-29.2
E6.27	L6.34	-36.7
E6.27	L6.35	-31.9
E6.27	L6.36	-31.3
E6.27	L6.37	-30.6
E6.27	L6.38	-38.2
E6.27	L6.39	-30.4
E6.27	L6.40	-27.8
E6.27	L6.41	-45.9
E6.27	L6.42	-33.4
E6.27	L6.43	-35.9
E6.27	L6.44	-37
E6.27	L6.45	-37
E6.27	L6.46	-25.9
E6.27	L6.47	-33.5
E6.28	L6.00	-22.5
E6.28	L6.01	-32.8
E6.28	L6.02	-27
E6.28	L6.03	-29.5
E6.28	L6.04	-32.7
E6.28	L6.05	-22.7
E6.28	L6.06	-23.8
E6.28	L6.07	-31.5
E6.28	L6.08	-29.1
E6.28	L6.09	-30.5
E6.28	L6.10	-29.2
E6.28	L6.11	-33.2
E6.28	L6.12	-28
E6.28	L6.13	-35.6
E6.28	L6.14	-33.8
E6.28	L6.15	-31.5
E6.28	L6.16	-39.9
E6.28	L6.17	-36.9
E6.28	L6.18	-38.1
E6.28	L6.19	-39.2
E6.28	L6.20	-31.9
E6.28	L6.21	-37.2
E6.28	L6.22	-33.3
E6.28	L6.23	-35.4
E6.28	L6.24	-30.7
E6.28	L6.25	-23.9
E6.28	L6.26	-27.2
E6.28	L6.27	-29.5
E6.28	L6.28	-79.5
E6.28	L6.29	-42.9
E6.28	L6.30	-34.6
E6.28	L6.31	-29.7
E6.28	L6.32	-35
E6.28	L6.33	-36.8
E6.28	L6.34	-27.8
E6.28	L6.35	-29
E6.28	L6.36	-40.5
E6.28	L6.37	-31.1
E6.28	L6.38	-20.5
E6.28	L6.39	-27.8
E6.28	L6.40	-32.4
E6.28	L6.41	-27.7
E6.28	L6.42	-37.8
E6.28	L6.43	-31.2
E6.28	L6.44	-29.6
E6.28	L6.45	-36.5
E6.28	L6.46	-30.6
E6.28	L6.47	-35.9
E6.29	L6.00	-29.8
E6.29	L6.01	-31.8
E6.29	L6.02	-37.4
E6.29	L6.03	-38.1
E6.29	L6.04	-36.6
E6.29	L6.05	-28.1
E6.29	L6.06	-26.7
E6.29	L6.07	-33.2
E6.29	L6.08	-32.4
E6.29	L6.09	-31.3
E6.29	L6.10	-36
E6.29	L6.11	-32
E6.29	L6.12	-33.6
E6.29	L6.13	-42.6
E6.29	L6.14	-27.5
E6.29	L6.15	-31
E6.29	L6.16	-32.6
E6.29	L6.17	-31.3
E6.29	L6.18	-41.9
E6.29	L6.19	-35.3
E6.29	L6.20	-23.1
E6.29	L6.21	-34.7
E6.29	L6.22	-36.4
E6.29	L6.23	-34.5
E6.29	L6.24	-37
E6.29	L6.25	-33.9
E6.29	L6.26	-35.8
E6.29	L6.27	-30
E6.29	L6.28	-36.8
E6.29	L6.29	-79.4
E6.29	L6.30	-33.4
E6.29	L6.31	-36.2
E6.29	L6.32	-34.1
E6.29	L6.33	-41.7
E6.29	L6.34	-40.2
E6.29	L6.35	-36.7
E6.29	L6.36	-37.9
E6.29	L6.37	-33.8
E6.29	L6.38	-26.9
E6.29	L6.39	-28.4
E6.29	L6.40	-27.2
E6.29	L6.41	-27.3
E6.29	L6.42	-41
E6.29	L6.43	-29.8
E6.29	L6.44	-31.7
E6.29	L6.45	-45.2
E6.29	L6.46	-26.8
E6.29	L6.47	-31.7
E6.30	L6.00	-26.6
E6.30	L6.01	-26.3
E6.30	L6.02	-28.1
E6.30	L6.03	-35.6
E6.30	L6.04	-25.8
E6.30	L6.05	-28.4
E6.30	L6.06	-24.8
E6.30	L6.07	-26.2
E6.30	L6.08	-24
E6.30	L6.09	-27.8
E6.30	L6.10	-30.6
E6.30	L6.11	-21.7
E6.30	L6.12	-31.3
E6.30	L6.13	-32
E6.30	L6.14	-21.7
E6.30	L6.15	-23.2
E6.30	L6.16	-25.8
E6.30	L6.17	-25.1
E6.30	L6.18	-26.8
E6.30	L6.19	-32.5
E6.30	L6.20	-23.7
E6.30	L6.21	-27.6
E6.30	L6.22	-28.3
E6.30	L6.23	-35.9
E6.30	L6.24	-28
E6.30	L6.25	-25.3
E6.30	L6.26	-30.6
E6.30	L6.27	-24.4
E6.30	L6.28	-32.3
E6.30	L6.29	-34
E6.30	L6.30	-74.3
E6.30	L6.31	-43.1
E6.30	L6.32	-21.3
E6.30	L6.33	-41.6
E6.30	L6.34	-34
E6.30	L6.35	-31.5
E6.30	L6.36	-32.6
E6.30	L6.37	-25.2
E6.30	L6.38	-27.6
E6.30	L6.39	-25.5
E6.30	L6.40	-26.1
E6.30	L6.41	-22.2
E6.30	L6.42	-30.6
E6.30	L6.43	-30.5
E6.30	L6.44	-29
E6.30	L6.45	-33.7
E6.30	L6.46	-22.1
E6.30	L6.47	-24.9
E6.31	L6.00	-38.2
E6.31	L6.01	-25.1
E6.31	L6.02	-31.5
E6.31	L6.03	-30.4
E6.31	L6.04	-27
E6.31	L6.05	-27.2
E6.31	L6.06	-25.2
E6.31	L6.07	-36.4
E6.31	L6.08	-38.5
E6.31	L6.09	-29.8
E6.31	L6.10	-22
E6.31	L6.11	-32.2
E6.31	L6.12	-32.1
E6.31	L6.13	-31.7
E6.31	L6.14	-25.4
E6.31	L6.15	-27.3
E6.31	L6.16	-27.2
E6.31	L6.17	-22.3
E6.31	L6.18	-32.2
E6.31	L6.19	-26.3
E6.31	L6.20	-38.8
E6.31	L6.21	-31.6
E6.31	L6.22	-36.8
E6.31	L6.23	-35.6
E6.31	L6.24	-31.1
E6.31	L6.25	-30.5
E6.31	L6.26	-31.7
E6.31	L6.27	-25.8
E6.31	L6.28	-26.2
E6.31	L6.29	-29.4
E6.31	L6.30	-37
E6.31	L6.31	-79.4
E6.31	L6.32	-31.1
E6.31	L6.33	-40.9
E6.31	L6.34	-37.5
E6.31	L6.35	-32.7
E6.31	L6.36	-25.9
E6.31	L6.37	-25
E6.31	L6.38	-24.6
E6.31	L6.39	-29.2
E6.31	L6.40	-27.6
E6.31	L6.41	-34.9
E6.31	L6.42	-36.4
E6.31	L6.43	-37.5
E6.31	L6.44	-28.9
E6.31	L6.45	-33.6
E6.31	L6.46	-22
E6.31	L6.47	-31.1
E6.32	L6.00	-34.4
E6.32	L6.01	-25.3
E6.32	L6.02	-32
E6.32	L6.03	-37.8
E6.32	L6.04	-32.8
E6.32	L6.05	-22.5
E6.32	L6.06	-21.5
E6.32	L6.07	-33.8
E6.32	L6.08	-38.8
E6.32	L6.09	-35.5
E6.32	L6.10	-31
E6.32	L6.11	-39.9
E6.32	L6.12	-34.7
E6.32	L6.13	-31.3
E6.32	L6.14	-27.5
E6.32	L6.15	-40.7
E6.32	L6.16	-30.6
E6.32	L6.17	-36.4
E6.32	L6.18	-41.2
E6.32	L6.19	-22.5
E6.32	L6.20	-28.5
E6.32	L6.21	-33.9
E6.32	L6.22	-40.6
E6.32	L6.23	-32.1
E6.32	L6.24	-28.5
E6.32	L6.25	-28.9
E6.32	L6.26	-33
E6.32	L6.27	-20.9
E6.32	L6.28	-33.7
E6.32	L6.29	-28.1
E6.32	L6.30	-27.4
E6.32	L6.31	-42
E6.32	L6.32	-79.9
E6.32	L6.33	-33.3
E6.32	L6.34	-30.3
E6.32	L6.35	-34.6
E6.32	L6.36	-26.6
E6.32	L6.37	-28.5
E6.32	L6.38	-19.8
E6.32	L6.39	-35.9
E6.32	L6.40	-24.6
E6.32	L6.41	-44.8
E6.32	L6.42	-52
E6.32	L6.43	-39.1
E6.32	L6.44	-25.7
E6.32	L6.45	-39.9
E6.32	L6.46	-27.9
E6.32	L6.47	-30.8
E6.33	L6.00	-33.9
E6.33	L6.01	-28.2
E6.33	L6.02	-32.5
E6.33	L6.03	-26.3
E6.33	L6.04	-25.8
E6.33	L6.05	-23.4
E6.33	L6.06	-23.5
E6.33	L6.07	-30.7
E6.33	L6.08	-28
E6.33	L6.09	-29.4
E6.33	L6.10	-25.6
E6.33	L6.11	-29.4
E6.33	L6.12	-28.9
E6.33	L6.13	-32.3
E6.33	L6.14	-27
E6.33	L6.15	-27.3
E6.33	L6.16	-27.5
E6.33	L6.17	-24.5
E6.33	L6.18	-27.3
E6.33	L6.19	-23.5
E6.33	L6.20	-26.9
E6.33	L6.21	-36.3
E6.33	L6.22	-42.6
E6.33	L6.23	-31.8
E6.33	L6.24	-27.8
E6.33	L6.25	-28.5
E6.33	L6.26	-29.9
E6.33	L6.27	-33.5
E6.33	L6.28	-36.1
E6.33	L6.29	-38.1
E6.33	L6.30	-36.5
E6.33	L6.31	-49.9
E6.33	L6.32	-28.2
E6.33	L6.33	-77.8
E6.33	L6.34	-31.6
E6.33	L6.35	-30.7
E6.33	L6.36	-33.7
E6.33	L6.37	-27.1
E6.33	L6.38	-20.2
E6.33	L6.39	-31.6
E6.33	L6.40	-28.9
E6.33	L6.41	-29.5
E6.33	L6.42	-35.9
E6.33	L6.43	-35.6
E6.33	L6.44	-25.6
E6.33	L6.45	-35
E6.33	L6.46	-26.8
E6.33	L6.47	-28
E6.34	L6.00	-35.8
E6.34	L6.01	-35.3
E6.34	L6.02	-41
E6.34	L6.03	-42.6
E6.34	L6.04	-35.2
E6.34	L6.05	-28.3
E6.34	L6.06	-28.1
E6.34	L6.07	-34.4
E6.34	L6.08	-36.2
E6.34	L6.09	-34.5
E6.34	L6.10	-30.4
E6.34	L6.11	-56
E6.34	L6.12	-33.9
E6.34	L6.13	-43.2
E6.34	L6.14	-35.3
E6.34	L6.15	-41.5
E6.34	L6.16	-28.8
E6.34	L6.17	-35.3
E6.34	L6.18	-36.8
E6.34	L6.19	-30.3
E6.34	L6.20	-37
E6.34	L6.21	-32.8
E6.34	L6.22	-44.7
E6.34	L6.23	-41.8
E6.34	L6.24	-31.9
E6.34	L6.25	-42.8
E6.34	L6.26	-41.1
E6.34	L6.27	-50.4
E6.34	L6.28	-31.3
E6.34	L6.29	-36.5
E6.34	L6.30	-29.7
E6.34	L6.31	-43.7
E6.34	L6.32	-36.6
E6.34	L6.33	-37.3
E6.34	L6.34	-84.4
E6.34	L6.35	-46.5
E6.34	L6.36	-41.4
E6.34	L6.37	-46.6
E6.34	L6.38	-24.9
E6.34	L6.39	-34.1
E6.34	L6.40	-36.5
E6.34	L6.41	-53.7
E6.34	L6.42	-44.3
E6.34	L6.43	-37.4
E6.34	L6.44	-42.2
E6.34	L6.45	-54.6
E6.34	L6.46	-23.6
E6.34	L6.47	-31.4
E6.35	L6.00	-29.4
E6.35	L6.01	-28.2
E6.35	L6.02	-34.6
E6.35	L6.03	-49.1
E6.35	L6.04	-41.1
E6.35	L6.05	-36.6
E6.35	L6.06	-24.1
E6.35	L6.07	-34.5
E6.35	L6.08	-34.2
E6.35	L6.09	-39.4
E6.35	L6.10	-32
E6.35	L6.11	-43.4
E6.35	L6.12	-40.5
E6.35	L6.13	-37.4
E6.35	L6.14	-34.5
E6.35	L6.15	-35.9
E6.35	L6.16	-37.4
E6.35	L6.17	-27.5
E6.35	L6.18	-36.7
E6.35	L6.19	-28.3
E6.35	L6.20	-36.1
E6.35	L6.21	-39.7
E6.35	L6.22	-49.9
E6.35	L6.23	-43.8
E6.35	L6.24	-28.4
E6.35	L6.25	-38.1
E6.35	L6.26	-44.9
E6.35	L6.27	-26.5
E6.35	L6.28	-28.9
E6.35	L6.29	-31.6
E6.35	L6.30	-29.9
E6.35	L6.31	-37.6
E6.35	L6.32	-40.3
E6.35	L6.33	-29.9
E6.35	L6.34	-42.1
E6.35	L6.35	-80.8
E6.35	L6.36	-39.8
E6.35	L6.37	-46.8
E6.35	L6.38	-26.5
E6.35	L6.39	-44.7
E6.35	L6.40	-47.1
E6.35	L6.41	-39.4
E6.35	L6.42	-53.1
E6.35	L6.43	-48.3
E6.35	L6.44	-39.1
E6.35	L6.45	-65.2
E6.35	L6.46	-18.8
E6.35	L6.47	-30.5
E6.36	L6.00	-28.6
E6.36	L6.01	-39.6
E6.36	L6.02	-36.5
E6.36	L6.03	-42.1
E6.36	L6.04	-30.9
E6.36	L6.05	-29.9
E6.36	L6.06	-35.8
E6.36	L6.07	-33.8
E6.36	L6.08	-26.9
E6.36	L6.09	-36.5
E6.36	L6.10	-26.3
E6.36	L6.11	-48.7
E6.36	L6.12	-41.9
E6.36	L6.13	-49
E6.36	L6.14	-36.1
E6.36	L6.15	-37.2
E6.36	L6.16	-32.5
E6.36	L6.17	-36.8
E6.36	L6.18	-35.7
E6.36	L6.19	-34.5
E6.36	L6.20	-35.1
E6.36	L6.21	-45.4
E6.36	L6.22	-37.1
E6.36	L6.23	-37.1
E6.36	L6.24	-25.3
E6.36	L6.25	-38.8
E6.36	L6.26	-36.3
E6.36	L6.27	-40.3
E6.36	L6.28	-45.9
E6.36	L6.29	-38.9
E6.36	L6.30	-37.8
E6.36	L6.31	-37.5
E6.36	L6.32	-37.4
E6.36	L6.33	-42.5
E6.36	L6.34	-43.5
E6.36	L6.35	-41.5
E6.36	L6.36	-76.5
E6.36	L6.37	-58.8
E6.36	L6.38	-26.7
E6.36	L6.39	-30
E6.36	L6.40	-38.1
E6.36	L6.41	-39.9
E6.36	L6.42	-40.9
E6.36	L6.43	-39.4
E6.36	L6.44	-39.5
E6.36	L6.45	-42.9
E6.36	L6.46	-22
E6.36	L6.47	-40
E6.37	L6.00	-25.7
E6.37	L6.01	-24.8
E6.37	L6.02	-31.6
E6.37	L6.03	-34.6
E6.37	L6.04	-28.3
E6.37	L6.05	-24.9
E6.37	L6.06	-25.1
E6.37	L6.07	-28.7
E6.37	L6.08	-27.6
E6.37	L6.09	-34.9
E6.37	L6.10	-24.8
E6.37	L6.11	-38.6
E6.37	L6.12	-40.3
E6.37	L6.13	-40.6
E6.37	L6.14	-30.6
E6.37	L6.15	-34
E6.37	L6.16	-30.1
E6.37	L6.17	-29
E6.37	L6.18	-35.1
E6.37	L6.19	-24.1
E6.37	L6.20	-24.5
E6.37	L6.21	-48.6
E6.37	L6.22	-40.4
E6.37	L6.23	-36.2
E6.37	L6.24	-25.5
E6.37	L6.25	-35.2
E6.37	L6.26	-34.8
E6.37	L6.27	-27.1
E6.37	L6.28	-30
E6.37	L6.29	-38
E6.37	L6.30	-29.9
E6.37	L6.31	-34.8
E6.37	L6.32	-29.9
E6.37	L6.33	-33.5
E6.37	L6.34	-44.3
E6.37	L6.35	-46.7
E6.37	L6.36	-59.9
E6.37	L6.37	-70.8
E6.37	L6.38	-18.7
E6.37	L6.39	-29
E6.37	L6.40	-37.8
E6.37	L6.41	-36.2
E6.37	L6.42	-43.9
E6.37	L6.43	-41.5
E6.37	L6.44	-33.1
E6.37	L6.45	-42.3
E6.37	L6.46	-25
E6.37	L6.47	-39.3
E6.38	L6.00	-27
E6.38	L6.01	-22.4
E6.38	L6.02	-26.2
E6.38	L6.03	-29
E6.38	L6.04	-25.4
E6.38	L6.05	-27.1
E6.38	L6.06	-21.2
E6.38	L6.07	-29.2
E6.38	L6.08	-33.8
E6.38	L6.09	-21.3
E6.38	L6.10	-23.9
E6.38	L6.11	-27.9
E6.38	L6.12	-23.5
E6.38	L6.13	-26.2
E6.38	L6.14	-28.7
E6.38	L6.15	-27.7
E6.38	L6.16	-26.2
E6.38	L6.17	-37
E6.38	L6.18	-30
E6.38	L6.19	-26.4
E6.38	L6.20	-25.8
E6.38	L6.21	-26.3
E6.38	L6.22	-38.6
E6.38	L6.23	-43
E6.38	L6.24	-35.8
E6.38	L6.25	-34.7
E6.38	L6.26	-38.6
E6.38	L6.27	-32.3
E6.38	L6.28	-24.9
E6.38	L6.29	-27.7
E6.38	L6.30	-27
E6.38	L6.31	-28
E6.38	L6.32	-28.8
E6.38	L6.33	-25
E6.38	L6.34	-25.3
E6.38	L6.35	-31.5
E6.38	L6.36	-30.7
E6.38	L6.37	-23.5
E6.38	L6.38	-69.2
E6.38	L6.39	-32.5
E6.38	L6.40	-25.7
E6.38	L6.41	-28.4
E6.38	L6.42	-30.4
E6.38	L6.43	-38.5
E6.38	L6.44	-22.8
E6.38	L6.45	-32.5
E6.38	L6.46	-23.7
E6.38	L6.47	-28.3
E6.39	L6.00	-30.4
E6.39	L6.01	-28.9
E6.39	L6.02	-28.2
E6.39	L6.03	-34.1
E6.39	L6.04	-37.3
E6.39	L6.05	-33.8
E6.39	L6.06	-27.9
E6.39	L6.07	-32.8
E6.39	L6.08	-36
E6.39	L6.09	-30.1
E6.39	L6.10	-30.4
E6.39	L6.11	-37.7
E6.39	L6.12	-42.2
E6.39	L6.13	-36.6
E6.39	L6.14	-30.5
E6.39	L6.15	-32.3
E6.39	L6.16	-31.7
E6.39	L6.17	-34.8
E6.39	L6.18	-37.7
E6.39	L6.19	-27.7
E6.39	L6.20	-33.6
E6.39	L6.21	-39
E6.39	L6.22	-43.2
E6.39	L6.23	-43.2
E6.39	L6.24	-31
E6.39	L6.25	-37.4
E6.39	L6.26	-32.2
E6.39	L6.27	-31.5
E6.39	L6.28	-27.8
E6.39	L6.29	-31.6
E6.39	L6.30	-28.5
E6.39	L6.31	-36
E6.39	L6.32	-36.3
E6.39	L6.33	-35.6
E6.39	L6.34	-38.3
E6.39	L6.35	-49.8
E6.39	L6.36	-40.4
E6.39	L6.37	-34.9
E6.39	L6.38	-27.2
E6.39	L6.39	-79.9
E6.39	L6.40	-33.7
E6.39	L6.41	-52.1
E6.39	L6.42	-41.9
E6.39	L6.43	-40.6
E6.39	L6.44	-31.9
E6.39	L6.45	-45.7
E6.39	L6.46	-25.4
E6.39	L6.47	-35.6
E6.40	L6.00	-39.1
E6.40	L6.01	-26.4
E6.40	L6.02	-33.2
E6.40	L6.03	-37.5
E6.40	L6.04	-31.7
E6.40	L6.05	-30.2
E6.40	L6.06	-30.8
E6.40	L6.07	-29.2
E6.40	L6.08	-27.7
E6.40	L6.09	-31.4
E6.40	L6.10	-23.7
E6.40	L6.11	-38.6
E6.40	L6.12	-32
E6.40	L6.13	-31.6
E6.40	L6.14	-24.3
E6.40	L6.15	-29.2
E6.40	L6.16	-28.3
E6.40	L6.17	-24.2
E6.40	L6.18	-35.3
E6.40	L6.19	-28.2
E6.40	L6.20	-21.9
E6.40	L6.21	-39.5
E6.40	L6.22	-36.7
E6.40	L6.23	-33.7
E6.40	L6.24	-23.7
E6.40	L6.25	-27
E6.40	L6.26	-30.7
E6.40	L6.27	-18.4
E6.40	L6.28	-28.1
E6.40	L6.29	-24.7
E6.40	L6.30	-29.9
E6.40	L6.31	-28.2
E6.40	L6.32	-29.3
E6.40	L6.33	-27.7
E6.40	L6.34	-37.5
E6.40	L6.35	-50.7
E6.40	L6.36	-35.6
E6.40	L6.37	-38.1
E6.40	L6.38	-23.2
E6.40	L6.39	-30.7
E6.40	L6.40	-73.3
E6.40	L6.41	-44.5
E6.40	L6.42	-56
E6.40	L6.43	-33.8
E6.40	L6.44	-28.6
E6.40	L6.45	-57.2
E6.40	L6.46	-29.5
E6.40	L6.47	-31.8
E6.41	L6.00	-37.7
E6.41	L6.01	-28.9
E6.41	L6.02	-31.3
E6.41	L6.03	-38.3
E6.41	L6.04	-24.1
E6.41	L6.05	-32.4
E6.41	L6.06	-34.4
E6.41	L6.07	-27.8
E6.41	L6.08	-32.3
E6.41	L6.09	-29.5
E6.41	L6.10	-26.6
E6.41	L6.11	-40.4
E6.41	L6.12	-41
E6.41	L6.13	-35.7
E6.41	L6.14	-26
E6.41	L6.15	-26.8
E6.41	L6.16	-23.8
E6.41	L6.17	-34.2
E6.41	L6.18	-27.7
E6.41	L6.19	-18.6
E6.41	L6.20	-34.1
E6.41	L6.21	-36.4
E6.41	L6.22	-27.8
E6.41	L6.23	-35.7
E6.41	L6.24	-34.6
E6.41	L6.25	-30.6
E6.41	L6.26	-42.6
E6.41	L6.27	-40.4
E6.41	L6.28	-26.2
E6.41	L6.29	-36
E6.41	L6.30	-27.8
[truncated: 305 more rows]

## Sheet: Exon9LigamerFoldingEn
exon	ligamer	energy
E9.00	L9.00	-68
E9.00	L9.01	-37.5
E9.00	L9.02	-42.8
E9.00	L9.03	-32.1
E9.00	L9.04	-41.4
E9.00	L9.05	-29.6
E9.00	L9.06	-38.3
E9.00	L9.07	-31.6
E9.00	L9.08	-31.3
E9.00	L9.09	-29.3
E9.00	L9.10	-32.5
E9.00	L9.11	-43.8
E9.00	L9.12	-34.5
E9.00	L9.13	-33.4
E9.00	L9.14	-28.8
E9.00	L9.15	-34.7
E9.00	L9.16	-29
E9.00	L9.17	-34.8
E9.00	L9.18	-28.8
E9.00	L9.19	-32.7
E9.00	L9.20	-37.4
E9.00	L9.21	-29.4
E9.00	L9.22	-23.4
E9.00	L9.23	-29.1
E9.00	L9.24	-25.2
E9.00	L9.25	-30.8
E9.00	L9.26	-34.3
E9.00	L9.27	-31.6
E9.00	L9.28	-32.2
E9.00	L9.29	-40.4
E9.00	L9.30	-44
E9.00	L9.31	-28.9
E9.00	L9.32	-31.1
E9.01	L9.00	-45.6
E9.01	L9.01	-71
E9.01	L9.02	-45
E9.01	L9.03	-57.2
E9.01	L9.04	-39.5
E9.01	L9.05	-38.7
E9.01	L9.06	-32.7
E9.01	L9.07	-32.2
E9.01	L9.08	-36.5
E9.01	L9.09	-33.7
E9.01	L9.10	-33.4
E9.01	L9.11	-41.7
E9.01	L9.12	-50
E9.01	L9.13	-34.7
E9.01	L9.14	-32.1
E9.01	L9.15	-31.7
E9.01	L9.16	-30.2
E9.01	L9.17	-34
E9.01	L9.18	-36.4
E9.01	L9.19	-32.4
E9.01	L9.20	-34.7
E9.01	L9.21	-24.6
E9.01	L9.22	-29.8
E9.01	L9.23	-37.1
E9.01	L9.24	-27.6
E9.01	L9.25	-25.9
E9.01	L9.26	-36.9
E9.01	L9.27	-40.8
E9.01	L9.28	-32
E9.01	L9.29	-38.3
E9.01	L9.30	-39.8
E9.01	L9.31	-31.4
E9.01	L9.32	-28.1
E9.02	L9.00	-44.5
E9.02	L9.01	-49.1
E9.02	L9.02	-69.3
E9.02	L9.03	-48.3
E9.02	L9.04	-42.1
E9.02	L9.05	-39.2
E9.02	L9.06	-30.8
E9.02	L9.07	-34.8
E9.02	L9.08	-35.6
E9.02	L9.09	-37.1
E9.02	L9.10	-30.3
E9.02	L9.11	-36
E9.02	L9.12	-36.8
E9.02	L9.13	-31.5
E9.02	L9.14	-24.9
E9.02	L9.15	-28.4
E9.02	L9.16	-29.4
E9.02	L9.17	-34
E9.02	L9.18	-33.8
E9.02	L9.19	-34.8
E9.02	L9.20	-37.1
E9.02	L9.21	-25.2
E9.02	L9.22	-28.7
E9.02	L9.23	-26.2
E9.02	L9.24	-26.2
E9.02	L9.25	-28
E9.02	L9.26	-37.7
E9.02	L9.27	-31.5
E9.02	L9.28	-31.5
E9.02	L9.29	-35
E9.02	L9.30	-41
E9.02	L9.31	-34.7
E9.02	L9.32	-33.1
E9.03	L9.00	-33.4
E9.03	L9.01	-43
E9.03	L9.02	-37.1
E9.03	L9.03	-72
E9.03	L9.04	-34.6
E9.03	L9.05	-32.1
E9.03	L9.06	-29.6
E9.03	L9.07	-32.6
E9.03	L9.08	-33.5
E9.03	L9.09	-31.6
E9.03	L9.10	-27.3
E9.03	L9.11	-34
E9.03	L9.12	-44.1
E9.03	L9.13	-27.1
E9.03	L9.14	-29.3
E9.03	L9.15	-33.6
E9.03	L9.16	-29
E9.03	L9.17	-33.6
E9.03	L9.18	-27.3
E9.03	L9.19	-31.6
E9.03	L9.20	-32.6
E9.03	L9.21	-26.7
E9.03	L9.22	-24.1
E9.03	L9.23	-26
E9.03	L9.24	-31.3
E9.03	L9.25	-28
E9.03	L9.26	-35.1
E9.03	L9.27	-30.9
E9.03	L9.28	-31.4
E9.03	L9.29	-30.1
E9.03	L9.30	-35.8
E9.03	L9.31	-33.3
E9.03	L9.32	-32.8
E9.04	L9.00	-37.9
E9.04	L9.01	-30.7
E9.04	L9.02	-29.7
E9.04	L9.03	-30.8
E9.04	L9.04	-68.6
E9.04	L9.05	-29.5
E9.04	L9.06	-25
E9.04	L9.07	-33.2
E9.04	L9.08	-31.9
E9.04	L9.09	-31.1
E9.04	L9.10	-32.8
E9.04	L9.11	-27.5
E9.04	L9.12	-29.1
E9.04	L9.13	-33.5
E9.04	L9.14	-26
E9.04	L9.15	-28.6
E9.04	L9.16	-27.2
E9.04	L9.17	-50.5
E9.04	L9.18	-31.8
E9.04	L9.19	-30.2
E9.04	L9.20	-29.8
E9.04	L9.21	-26.4
E9.04	L9.22	-24.8
E9.04	L9.23	-28.8
E9.04	L9.24	-29.3
E9.04	L9.25	-35.5
E9.04	L9.26	-32.9
E9.04	L9.27	-29.5
E9.04	L9.28	-26
E9.04	L9.29	-28.2
E9.04	L9.30	-35.9
E9.04	L9.31	-29.7
E9.04	L9.32	-26.8
E9.05	L9.00	-34
E9.05	L9.01	-36.9
E9.05	L9.02	-36.3
E9.05	L9.03	-39.9
E9.05	L9.04	-37.2
E9.05	L9.05	-62.6
E9.05	L9.06	-33.8
E9.05	L9.07	-40.2
E9.05	L9.08	-36.5
E9.05	L9.09	-34.5
E9.05	L9.10	-31.2
E9.05	L9.11	-37.7
E9.05	L9.12	-35.9
E9.05	L9.13	-31.7
E9.05	L9.14	-24.5
E9.05	L9.15	-34.4
E9.05	L9.16	-30.5
E9.05	L9.17	-33.8
E9.05	L9.18	-32
E9.05	L9.19	-36.5
E9.05	L9.20	-35.3
E9.05	L9.21	-38.9
E9.05	L9.22	-30.4
E9.05	L9.23	-30.6
E9.05	L9.24	-26.7
E9.05	L9.25	-26.1
E9.05	L9.26	-39.8
E9.05	L9.27	-44.4
E9.05	L9.28	-33
E9.05	L9.29	-27.1
E9.05	L9.30	-46.8
E9.05	L9.31	-31.7
E9.05	L9.32	-34.7
E9.06	L9.00	-30.3
E9.06	L9.01	-30.3
E9.06	L9.02	-27.9
E9.06	L9.03	-32.8
E9.06	L9.04	-32.5
E9.06	L9.05	-30.5
E9.06	L9.06	-66.7
E9.06	L9.07	-31.8
E9.06	L9.08	-30.1
E9.06	L9.09	-38.3
E9.06	L9.10	-31.7
E9.06	L9.11	-27.9
E9.06	L9.12	-30
E9.06	L9.13	-38.5
E9.06	L9.14	-23.8
E9.06	L9.15	-35.6
E9.06	L9.16	-30.2
E9.06	L9.17	-40
E9.06	L9.18	-27.4
E9.06	L9.19	-33.4
E9.06	L9.20	-28.5
E9.06	L9.21	-27.2
E9.06	L9.22	-25.2
E9.06	L9.23	-31.1
E9.06	L9.24	-31.1
E9.06	L9.25	-28.7
E9.06	L9.26	-33.2
E9.06	L9.27	-30.6
E9.06	L9.28	-32.4
E9.06	L9.29	-29.4
E9.06	L9.30	-39.9
E9.06	L9.31	-31.1
E9.06	L9.32	-26.1
E9.07	L9.00	-39.5
E9.07	L9.01	-34.2
E9.07	L9.02	-31.3
E9.07	L9.03	-37.9
E9.07	L9.04	-36.4
E9.07	L9.05	-35.1
E9.07	L9.06	-28.5
E9.07	L9.07	-67.9
E9.07	L9.08	-35.5
E9.07	L9.09	-35.3
E9.07	L9.10	-36.5
E9.07	L9.11	-34
E9.07	L9.12	-32.8
E9.07	L9.13	-40.4
E9.07	L9.14	-20.7
E9.07	L9.15	-33.2
E9.07	L9.16	-40.8
E9.07	L9.17	-32.2
E9.07	L9.18	-34.8
E9.07	L9.19	-30.5
E9.07	L9.20	-36.8
E9.07	L9.21	-44.5
E9.07	L9.22	-28.7
E9.07	L9.23	-27.7
E9.07	L9.24	-24.7
E9.07	L9.25	-36.2
E9.07	L9.26	-39.8
E9.07	L9.27	-37.2
E9.07	L9.28	-31
E9.07	L9.29	-28.6
E9.07	L9.30	-39.6
E9.07	L9.31	-36.5
E9.07	L9.32	-33
E9.08	L9.00	-37.9
E9.08	L9.01	-43
E9.08	L9.02	-50.3
E9.08	L9.03	-48.1
E9.08	L9.04	-35.6
E9.08	L9.05	-38.3
E9.08	L9.06	-41.6
E9.08	L9.07	-32.4
E9.08	L9.08	-72.6
E9.08	L9.09	-45.6
E9.08	L9.10	-32.4
E9.08	L9.11	-36.1
E9.08	L9.12	-38.4
E9.08	L9.13	-35.1
E9.08	L9.14	-28.9
E9.08	L9.15	-36.5
E9.08	L9.16	-30.8
E9.08	L9.17	-35.6
E9.08	L9.18	-36.2
E9.08	L9.19	-38.2
E9.08	L9.20	-34.9
E9.08	L9.21	-32.7
E9.08	L9.22	-26.9
E9.08	L9.23	-32.2
E9.08	L9.24	-33.3
E9.08	L9.25	-28.8
E9.08	L9.26	-31.1
E9.08	L9.27	-34.2
E9.08	L9.28	-32.6
E9.08	L9.29	-34.8
E9.08	L9.30	-38.5
E9.08	L9.31	-39
E9.08	L9.32	-36.4
E9.09	L9.00	-31.4
E9.09	L9.01	-41.3
E9.09	L9.02	-32.1
E9.09	L9.03	-38.8
E9.09	L9.04	-39.8
E9.09	L9.05	-34.1
E9.09	L9.06	-32.7
E9.09	L9.07	-29.6
E9.09	L9.08	-38.9
E9.09	L9.09	-70.9
E9.09	L9.10	-34.7
E9.09	L9.11	-29.1
E9.09	L9.12	-31
E9.09	L9.13	-32.5
E9.09	L9.14	-28.6
E9.09	L9.15	-31.5
E9.09	L9.16	-33.7
E9.09	L9.17	-29.5
E9.09	L9.18	-29
E9.09	L9.19	-36.8
E9.09	L9.20	-35.2
E9.09	L9.21	-30.4
E9.09	L9.22	-24.4
E9.09	L9.23	-32.9
E9.09	L9.24	-35.7
E9.09	L9.25	-37
E9.09	L9.26	-37.7
E9.09	L9.27	-33.6
E9.09	L9.28	-29.1
E9.09	L9.29	-32.5
E9.09	L9.30	-43.3
E9.09	L9.31	-31.8
E9.09	L9.32	-28
E9.10	L9.00	-39.5
E9.10	L9.01	-37.7
E9.10	L9.02	-31.3
E9.10	L9.03	-31.2
E9.10	L9.04	-45.1
E9.10	L9.05	-31.5
E9.10	L9.06	-30.5
E9.10	L9.07	-31.1
E9.10	L9.08	-31
E9.10	L9.09	-36.4
E9.10	L9.10	-64.3
E9.10	L9.11	-36.2
E9.10	L9.12	-33.4
E9.10	L9.13	-38.8
E9.10	L9.14	-30.3
E9.10	L9.15	-31.1
E9.10	L9.16	-33.2
E9.10	L9.17	-31.9
E9.10	L9.18	-34.2
E9.10	L9.19	-29.2
E9.10	L9.20	-37.6
E9.10	L9.21	-45
E9.10	L9.22	-26.1
E9.10	L9.23	-30.4
E9.10	L9.24	-29.8
E9.10	L9.25	-31.3
E9.10	L9.26	-36.4
E9.10	L9.27	-34.5
E9.10	L9.28	-32.6
E9.10	L9.29	-33.4
E9.10	L9.30	-39.8
E9.10	L9.31	-35.5
E9.10	L9.32	-39.1
E9.11	L9.00	-37.7
E9.11	L9.01	-38.9
E9.11	L9.02	-37.7
E9.11	L9.03	-39.7
E9.11	L9.04	-38.7
E9.11	L9.05	-36.2
E9.11	L9.06	-31.5
E9.11	L9.07	-42.6
E9.11	L9.08	-32.8
E9.11	L9.09	-35
E9.11	L9.10	-31.3
E9.11	L9.11	-65
E9.11	L9.12	-36.7
E9.11	L9.13	-33.8
E9.11	L9.14	-25.1
E9.11	L9.15	-30.5
E9.11	L9.16	-28.6
E9.11	L9.17	-33
E9.11	L9.18	-25.3
E9.11	L9.19	-35.5
E9.11	L9.20	-35.9
E9.11	L9.21	-25.7
E9.11	L9.22	-21.9
E9.11	L9.23	-29.8
E9.11	L9.24	-30.4
E9.11	L9.25	-28.5
E9.11	L9.26	-38
E9.11	L9.27	-30.4
E9.11	L9.28	-36.3
E9.11	L9.29	-34.5
E9.11	L9.30	-39.3
E9.11	L9.31	-36.1
E9.11	L9.32	-32.3
E9.12	L9.00	-36.3
E9.12	L9.01	-47
E9.12	L9.02	-33.7
E9.12	L9.03	-48.3
E9.12	L9.04	-36.7
E9.12	L9.05	-41.7
E9.12	L9.06	-31.1
E9.12	L9.07	-34.8
E9.12	L9.08	-39.9
E9.12	L9.09	-35.3
E9.12	L9.10	-35.4
E9.12	L9.11	-33.9
E9.12	L9.12	-64.2
E9.12	L9.13	-30.7
E9.12	L9.14	-27.1
E9.12	L9.15	-31.4
E9.12	L9.16	-31
E9.12	L9.17	-39.7
E9.12	L9.18	-32.3
E9.12	L9.19	-30.6
E9.12	L9.20	-31.8
E9.12	L9.21	-27.1
E9.12	L9.22	-21.7
E9.12	L9.23	-23.5
E9.12	L9.24	-29.2
E9.12	L9.25	-29.9
E9.12	L9.26	-36.7
E9.12	L9.27	-32.6
E9.12	L9.28	-31.1
E9.12	L9.29	-35
E9.12	L9.30	-35.2
E9.12	L9.31	-34.5
E9.12	L9.32	-28.9
E9.13	L9.00	-31.4
E9.13	L9.01	-35.6
E9.13	L9.02	-30.5
E9.13	L9.03	-38.7
E9.13	L9.04	-43.1
E9.13	L9.05	-33
E9.13	L9.06	-31.9
E9.13	L9.07	-37.7
E9.13	L9.08	-33.6
E9.13	L9.09	-34.3
E9.13	L9.10	-30.1
E9.13	L9.11	-39.6
E9.13	L9.12	-35.2
E9.13	L9.13	-65.2
E9.13	L9.14	-29.3
E9.13	L9.15	-32.4
E9.13	L9.16	-39.3
E9.13	L9.17	-36
E9.13	L9.18	-33.9
E9.13	L9.19	-33.4
E9.13	L9.20	-30.9
E9.13	L9.21	-33
E9.13	L9.22	-30.4
E9.13	L9.23	-27.1
E9.13	L9.24	-29.8
E9.13	L9.25	-33.3
E9.13	L9.26	-35.5
E9.13	L9.27	-34
E9.13	L9.28	-38.8
E9.13	L9.29	-37
E9.13	L9.30	-42.6
E9.13	L9.31	-30.1
E9.13	L9.32	-42.3
E9.14	L9.00	-33.4
E9.14	L9.01	-33.1
E9.14	L9.02	-30.7
E9.14	L9.03	-38.9
E9.14	L9.04	-37.8
E9.14	L9.05	-26.8
E9.14	L9.06	-31.6
E9.14	L9.07	-28.4
E9.14	L9.08	-33.7
E9.14	L9.09	-27.4
E9.14	L9.10	-34.8
E9.14	L9.11	-33.5
E9.14	L9.12	-27.6
E9.14	L9.13	-33.5
E9.14	L9.14	-60.3
E9.14	L9.15	-28.4
E9.14	L9.16	-34.3
E9.14	L9.17	-34
E9.14	L9.18	-26.9
E9.14	L9.19	-40.6
E9.14	L9.20	-30.4
E9.14	L9.21	-31
E9.14	L9.22	-30.8
E9.14	L9.23	-24.7
E9.14	L9.24	-29.4
E9.14	L9.25	-29.6
E9.14	L9.26	-40.5
E9.14	L9.27	-28.9
E9.14	L9.28	-26.8
E9.14	L9.29	-27.2
E9.14	L9.30	-34.4
E9.14	L9.31	-29.2
E9.14	L9.32	-28.3
E9.15	L9.00	-36.1
E9.15	L9.01	-41.7
E9.15	L9.02	-39.3
E9.15	L9.03	-37.8
E9.15	L9.04	-34.1
E9.15	L9.05	-32.4
E9.15	L9.06	-31
E9.15	L9.07	-30.3
E9.15	L9.08	-29.9
E9.15	L9.09	-40.8
E9.15	L9.10	-29.3
E9.15	L9.11	-34.7
E9.15	L9.12	-36.3
E9.15	L9.13	-33.7
E9.15	L9.14	-28.9
E9.15	L9.15	-62.5
E9.15	L9.16	-29.3
E9.15	L9.17	-37.8
E9.15	L9.18	-39
E9.15	L9.19	-30.4
E9.15	L9.20	-38.7
E9.15	L9.21	-33
E9.15	L9.22	-29.3
E9.15	L9.23	-29.8
E9.15	L9.24	-38.8
E9.15	L9.25	-34
E9.15	L9.26	-36.7
E9.15	L9.27	-29.2
E9.15	L9.28	-31.7
E9.15	L9.29	-30.1
E9.15	L9.30	-36.3
E9.15	L9.31	-37.9
E9.15	L9.32	-32.9
E9.16	L9.00	-28.5
E9.16	L9.01	-38.1
E9.16	L9.02	-28.7
E9.16	L9.03	-32.8
E9.16	L9.04	-31.9
E9.16	L9.05	-30.9
E9.16	L9.06	-30.2
E9.16	L9.07	-33.4
E9.16	L9.08	-32.6
E9.16	L9.09	-30
E9.16	L9.10	-27
E9.16	L9.11	-33.5
E9.16	L9.12	-28.6
E9.16	L9.13	-38.1
E9.16	L9.14	-26.8
E9.16	L9.15	-33.5
E9.16	L9.16	-63.1
E9.16	L9.17	-34.7
E9.16	L9.18	-39.8
E9.16	L9.19	-33.6
E9.16	L9.20	-30.8
E9.16	L9.21	-42
E9.16	L9.22	-32.3
E9.16	L9.23	-26.9
E9.16	L9.24	-26.6
E9.16	L9.25	-29.7
E9.16	L9.26	-31.7
E9.16	L9.27	-30.1
E9.16	L9.28	-32
E9.16	L9.29	-30.4
E9.16	L9.30	-33.9
E9.16	L9.31	-31
E9.16	L9.32	-37.1
E9.17	L9.00	-31.5
E9.17	L9.01	-36.4
E9.17	L9.02	-34.1
E9.17	L9.03	-30.7
E9.17	L9.04	-36.1
E9.17	L9.05	-37.4
E9.17	L9.06	-28.8
E9.17	L9.07	-26.4
E9.17	L9.08	-35
E9.17	L9.09	-32.6
E9.17	L9.10	-26
E9.17	L9.11	-28.4
E9.17	L9.12	-33.2
E9.17	L9.13	-33.2
E9.17	L9.14	-23.3
E9.17	L9.15	-36.8
E9.17	L9.16	-36.1
E9.17	L9.17	-63.5
E9.17	L9.18	-35.2
E9.17	L9.19	-35.3
E9.17	L9.20	-43
E9.17	L9.21	-33.5
E9.17	L9.22	-26.1
E9.17	L9.23	-35.4
E9.17	L9.24	-39.3
E9.17	L9.25	-34.1
E9.17	L9.26	-34.1
E9.17	L9.27	-44.1
E9.17	L9.28	-38.4
E9.17	L9.29	-28.9
E9.17	L9.30	-36
E9.17	L9.31	-35.1
E9.17	L9.32	-29.9
E9.18	L9.00	-34.8
E9.18	L9.01	-33.9
E9.18	L9.02	-29.7
E9.18	L9.03	-32.6
E9.18	L9.04	-36.7
E9.18	L9.05	-31.7
E9.18	L9.06	-28
E9.18	L9.07	-26.4
E9.18	L9.08	-26.3
E9.18	L9.09	-27.1
E9.18	L9.10	-27.8
E9.18	L9.11	-31.2
E9.18	L9.12	-29.3
E9.18	L9.13	-25.9
E9.18	L9.14	-23.4
E9.18	L9.15	-29.6
E9.18	L9.16	-29.2
E9.18	L9.17	-39
E9.18	L9.18	-62.9
E9.18	L9.19	-37.6
E9.18	L9.20	-37.5
E9.18	L9.21	-32.7
E9.18	L9.22	-35.6
E9.18	L9.23	-31.1
E9.18	L9.24	-35.9
E9.18	L9.25	-29.1
E9.18	L9.26	-28.6
E9.18	L9.27	-30.1
E9.18	L9.28	-29.6
E9.18	L9.29	-32.8
E9.18	L9.30	-37.5
E9.18	L9.31	-27.2
E9.18	L9.32	-32.5
E9.19	L9.00	-27.6
E9.19	L9.01	-28.6
E9.19	L9.02	-28.6
E9.19	L9.03	-29.8
E9.19	L9.04	-37.5
E9.19	L9.05	-28.7
E9.19	L9.06	-27.8
E9.19	L9.07	-27.6
E9.19	L9.08	-23.7
E9.19	L9.09	-23
E9.19	L9.10	-26.1
E9.19	L9.11	-32
E9.19	L9.12	-30.3
E9.19	L9.13	-32.4
E9.19	L9.14	-28.9
E9.19	L9.15	-26.4
E9.19	L9.16	-31.6
E9.19	L9.17	-31.2
E9.19	L9.18	-45.7
E9.19	L9.19	-64.3
E9.19	L9.20	-36.3
E9.19	L9.21	-38.7
E9.19	L9.22	-30.2
E9.19	L9.23	-30.3
E9.19	L9.24	-31.5
E9.19	L9.25	-30.4
E9.19	L9.26	-33.1
E9.19	L9.27	-36.5
E9.19	L9.28	-35.2
E9.19	L9.29	-35.8
E9.19	L9.30	-38.7
E9.19	L9.31	-33.9
E9.19	L9.32	-31.5
E9.20	L9.00	-31
E9.20	L9.01	-35.1
E9.20	L9.02	-33.4
E9.20	L9.03	-34.6
E9.20	L9.04	-40.4
E9.20	L9.05	-27.5
E9.20	L9.06	-30.5
E9.20	L9.07	-30.3
E9.20	L9.08	-26.3
E9.20	L9.09	-31.7
E9.20	L9.10	-30.3
E9.20	L9.11	-31.6
E9.20	L9.12	-28.9
E9.20	L9.13	-27.5
E9.20	L9.14	-27
E9.20	L9.15	-26.8
E9.20	L9.16	-34.1
E9.20	L9.17	-34.8
E9.20	L9.18	-37.3
E9.20	L9.19	-36
E9.20	L9.20	-67.1
E9.20	L9.21	-42.2
E9.20	L9.22	-30.5
E9.20	L9.23	-31.9
E9.20	L9.24	-26.1
E9.20	L9.25	-35.1
E9.20	L9.26	-34.4
E9.20	L9.27	-31.6
E9.20	L9.28	-28.5
E9.20	L9.29	-31
E9.20	L9.30	-37
E9.20	L9.31	-30.9
E9.20	L9.32	-28.2
E9.21	L9.00	-26.7
E9.21	L9.01	-35.9
E9.21	L9.02	-28.6
E9.21	L9.03	-35.7
E9.21	L9.04	-33.8
E9.21	L9.05	-28.2
E9.21	L9.06	-29.4
E9.21	L9.07	-31.9
E9.21	L9.08	-26.3
E9.21	L9.09	-30
E9.21	L9.10	-33
E9.21	L9.11	-34.4
E9.21	L9.12	-31.6
E9.21	L9.13	-34.1
E9.21	L9.14	-35.2
E9.21	L9.15	-26.8
E9.21	L9.16	-41.2
E9.21	L9.17	-33.4
E9.21	L9.18	-44.5
E9.21	L9.19	-36.8
E9.21	L9.20	-47.3
E9.21	L9.21	-67.7
E9.21	L9.22	-35.9
E9.21	L9.23	-26.1
E9.21	L9.24	-26.2
E9.21	L9.25	-34.9
E9.21	L9.26	-35.9
E9.21	L9.27	-25.2
E9.21	L9.28	-32.4
E9.21	L9.29	-30.4
E9.21	L9.30	-36.2
E9.21	L9.31	-30.1
E9.21	L9.32	-33.3
E9.22	L9.00	-29.5
E9.22	L9.01	-27.9
E9.22	L9.02	-28.8
E9.22	L9.03	-32.2
E9.22	L9.04	-31.9
E9.22	L9.05	-32.8
E9.22	L9.06	-33
E9.22	L9.07	-30.9
E9.22	L9.08	-27.8
E9.22	L9.09	-28.9
E9.22	L9.10	-28.5
E9.22	L9.11	-37.3
E9.22	L9.12	-27.1
E9.22	L9.13	-34
E9.22	L9.14	-35.9
E9.22	L9.15	-26.9
E9.22	L9.16	-36.7
E9.22	L9.17	-36.2
E9.22	L9.18	-34.9
E9.22	L9.19	-33.3
E9.22	L9.20	-35.3
E9.22	L9.21	-41.9
E9.22	L9.22	-59.1
E9.22	L9.23	-30.3
E9.22	L9.24	-27.9
E9.22	L9.25	-30.6
E9.22	L9.26	-30.2
E9.22	L9.27	-29.8
E9.22	L9.28	-31.8
E9.22	L9.29	-32.3
E9.22	L9.30	-35.1
E9.22	L9.31	-26.1
E9.22	L9.32	-33.8
E9.23	L9.00	-26.8
E9.23	L9.01	-36.9
E9.23	L9.02	-34.5
E9.23	L9.03	-32.9
E9.23	L9.04	-37.2
E9.23	L9.05	-33.3
E9.23	L9.06	-27.9
E9.23	L9.07	-35.4
E9.23	L9.08	-41.9
E9.23	L9.09	-33.1
E9.23	L9.10	-25
E9.23	L9.11	-33.4
E9.23	L9.12	-35.2
E9.23	L9.13	-30.9
E9.23	L9.14	-23.6
E9.23	L9.15	-30.5
E9.23	L9.16	-41.7
E9.23	L9.17	-38.1
E9.23	L9.18	-28.4
E9.23	L9.19	-31.3
E9.23	L9.20	-32.9
E9.23	L9.21	-29.4
E9.23	L9.22	-26.8
E9.23	L9.23	-62.6
E9.23	L9.24	-26.5
E9.23	L9.25	-29.9
E9.23	L9.26	-30
E9.23	L9.27	-33.8
E9.23	L9.28	-30
E9.23	L9.29	-29.1
E9.23	L9.30	-39
E9.23	L9.31	-32.3
E9.23	L9.32	-28.4
E9.24	L9.00	-30.2
E9.24	L9.01	-39.5
E9.24	L9.02	-29.6
E9.24	L9.03	-34.5
E9.24	L9.04	-34
E9.24	L9.05	-26
E9.24	L9.06	-26.1
E9.24	L9.07	-26.7
E9.24	L9.08	-28.2
E9.24	L9.09	-29.7
E9.24	L9.10	-23.6
E9.24	L9.11	-31.5
E9.24	L9.12	-34
E9.24	L9.13	-26.7
E9.24	L9.14	-30
E9.24	L9.15	-27.6
E9.24	L9.16	-26.2
E9.24	L9.17	-43.6
E9.24	L9.18	-38.1
E9.24	L9.19	-30.4
E9.24	L9.20	-40.6
E9.24	L9.21	-34.1
E9.24	L9.22	-30.2
E9.24	L9.23	-27.6
E9.24	L9.24	-52.7
E9.24	L9.25	-37
E9.24	L9.26	-30.6
E9.24	L9.27	-27.2
E9.24	L9.28	-29.3
E9.24	L9.29	-34.3
E9.24	L9.30	-36.8
E9.24	L9.31	-27.3
E9.24	L9.32	-27.7
E9.25	L9.00	-26.4
E9.25	L9.01	-30.5
E9.25	L9.02	-27.8
E9.25	L9.03	-27.4
E9.25	L9.04	-32.3
E9.25	L9.05	-28.1
E9.25	L9.06	-33.2
E9.25	L9.07	-25.6
E9.25	L9.08	-38.1
E9.25	L9.09	-31.9
E9.25	L9.10	-32.5
E9.25	L9.11	-38.5
E9.25	L9.12	-27.4
E9.25	L9.13	-27.5
E9.25	L9.14	-24.8
E9.25	L9.15	-36.6
E9.25	L9.16	-25
E9.25	L9.17	-36.2
E9.25	L9.18	-28.1
E9.25	L9.19	-28.5
E9.25	L9.20	-39.9
E9.25	L9.21	-37.7
E9.25	L9.22	-31.4
E9.25	L9.23	-33.4
E9.25	L9.24	-31.4
E9.25	L9.25	-61.7
E9.25	L9.26	-34.3
E9.25	L9.27	-32
E9.25	L9.28	-26.9
E9.25	L9.29	-30.6
E9.25	L9.30	-33.3
E9.25	L9.31	-23.9
E9.25	L9.32	-27.7
E9.26	L9.00	-33.1
E9.26	L9.01	-35.3
E9.26	L9.02	-39.3
E9.26	L9.03	-36.3
E9.26	L9.04	-38.5
E9.26	L9.05	-39.8
E9.26	L9.06	-29.3
E9.26	L9.07	-36.7
E9.26	L9.08	-32
E9.26	L9.09	-36.4
E9.26	L9.10	-32.1
E9.26	L9.11	-36.3
E9.26	L9.12	-36.3
E9.26	L9.13	-32
E9.26	L9.14	-29.9
E9.26	L9.15	-34.7
E9.26	L9.16	-28
E9.26	L9.17	-31.6
E9.26	L9.18	-34.5
E9.26	L9.19	-33.3
E9.26	L9.20	-41.2
E9.26	L9.21	-38.2
E9.26	L9.22	-29.4
E9.26	L9.23	-26.4
E9.26	L9.24	-28.4
E9.26	L9.25	-27.2
E9.26	L9.26	-65.9
E9.26	L9.27	-31.9
E9.26	L9.28	-30.7
E9.26	L9.29	-32.5
E9.26	L9.30	-39
E9.26	L9.31	-35.9
E9.26	L9.32	-34.5
E9.27	L9.00	-29.5
E9.27	L9.01	-39.4
E9.27	L9.02	-31
E9.27	L9.03	-41.7
E9.27	L9.04	-40.1
E9.27	L9.05	-44.1
E9.27	L9.06	-34.4
E9.27	L9.07	-32.3
E9.27	L9.08	-26.9
E9.27	L9.09	-27.7
E9.27	L9.10	-32
E9.27	L9.11	-30.4
E9.27	L9.12	-25.9
E9.27	L9.13	-34.9
E9.27	L9.14	-23.7
E9.27	L9.15	-29.4
E9.27	L9.16	-32.9
E9.27	L9.17	-37.9
E9.27	L9.18	-31.9
E9.27	L9.19	-30
E9.27	L9.20	-32
E9.27	L9.21	-30.7
E9.27	L9.22	-27.1
E9.27	L9.23	-33.2
E9.27	L9.24	-24.2
E9.27	L9.25	-27.5
E9.27	L9.26	-30.2
E9.27	L9.27	-70.4
E9.27	L9.28	-28.3
E9.27	L9.29	-29.7
E9.27	L9.30	-34.9
E9.27	L9.31	-30.5
E9.27	L9.32	-27
E9.28	L9.00	-44.8
E9.28	L9.01	-39.5
E9.28	L9.02	-40.3
E9.28	L9.03	-37.9
E9.28	L9.04	-31.9
E9.28	L9.05	-33.6
E9.28	L9.06	-30.1
E9.28	L9.07	-29.7
E9.28	L9.08	-36.7
E9.28	L9.09	-30.8
E9.28	L9.10	-32.3
E9.28	L9.11	-36.8
E9.28	L9.12	-34.1
E9.28	L9.13	-35.9
E9.28	L9.14	-25.1
E9.28	L9.15	-31.5
E9.28	L9.16	-31.6
E9.28	L9.17	-34.4
E9.28	L9.18	-32
E9.28	L9.19	-32.7
E9.28	L9.20	-31.6
E9.28	L9.21	-29.9
E9.28	L9.22	-30.8
E9.28	L9.23	-27.9
E9.28	L9.24	-29.9
E9.28	L9.25	-33.4
E9.28	L9.26	-31
E9.28	L9.27	-28.5
E9.28	L9.28	-61.6
E9.28	L9.29	-36.2
E9.28	L9.30	-37.1
E9.28	L9.31	-30.1
E9.28	L9.32	-31.5
E9.29	L9.00	-37.4
E9.29	L9.01	-43.4
E9.29	L9.02	-37.5
E9.29	L9.03	-36.2
E9.29	L9.04	-38.6
E9.29	L9.05	-36.9
E9.29	L9.06	-36.2
E9.29	L9.07	-33.5
E9.29	L9.08	-34.7
E9.29	L9.09	-37.1
E9.29	L9.10	-30.3
E9.29	L9.11	-42
E9.29	L9.12	-34.9
E9.29	L9.13	-32.9
E9.29	L9.14	-31.7
E9.29	L9.15	-35
E9.29	L9.16	-29
E9.29	L9.17	-35.1
E9.29	L9.18	-32.4
E9.29	L9.19	-33.3
E9.29	L9.20	-38.9
E9.29	L9.21	-34.5
E9.29	L9.22	-27.7
E9.29	L9.23	-31
E9.29	L9.24	-27.6
E9.29	L9.25	-28.7
E9.29	L9.26	-38.1
E9.29	L9.27	-38.8
E9.29	L9.28	-35.5
E9.29	L9.29	-64.8
E9.29	L9.30	-43.4
E9.29	L9.31	-45.6
E9.29	L9.32	-29.4
E9.30	L9.00	-38.8
E9.30	L9.01	-37.1
E9.30	L9.02	-34.6
E9.30	L9.03	-35.8
E9.30	L9.04	-45.1
E9.30	L9.05	-35.6
E9.30	L9.06	-35.3
E9.30	L9.07	-33.1
E9.30	L9.08	-34.4
E9.30	L9.09	-35.4
E9.30	L9.10	-29.2
E9.30	L9.11	-40.3
E9.30	L9.12	-35.3
E9.30	L9.13	-41.5
E9.30	L9.14	-30.1
E9.30	L9.15	-35.7
E9.30	L9.16	-37.6
E9.30	L9.17	-32.8
E9.30	L9.18	-33.5
E9.30	L9.19	-44.4
E9.30	L9.20	-34.1
E9.30	L9.21	-36.1
E9.30	L9.22	-31.7
E9.30	L9.23	-40.1
E9.30	L9.24	-28.8
E9.30	L9.25	-31.9
E9.30	L9.26	-44.2
E9.30	L9.27	-30.1
E9.30	L9.28	-35.3
E9.30	L9.29	-33.2
E9.30	L9.30	-72.8
E9.30	L9.31	-35.6
E9.30	L9.32	-35.5
E9.31	L9.00	-39.6
E9.31	L9.01	-48.3
E9.31	L9.02	-42.3
E9.31	L9.03	-43.9
E9.31	L9.04	-40.5
E9.31	L9.05	-33.2
E9.31	L9.06	-33.6
E9.31	L9.07	-33.2
E9.31	L9.08	-43.7
E9.31	L9.09	-35.3
E9.31	L9.10	-33.2
E9.31	L9.11	-42
E9.31	L9.12	-41.6
E9.31	L9.13	-34.9
E9.31	L9.14	-29.7
E9.31	L9.15	-32.6
E9.31	L9.16	-29.2
E9.31	L9.17	-33.4
E9.31	L9.18	-36.1
E9.31	L9.19	-34.8
E9.31	L9.20	-36.7
E9.31	L9.21	-28.4
E9.31	L9.22	-25.2
E9.31	L9.23	-31
E9.31	L9.24	-28.7
E9.31	L9.25	-31.5
E9.31	L9.26	-38
E9.31	L9.27	-33.3
E9.31	L9.28	-33.6
E9.31	L9.29	-34.1
E9.31	L9.30	-38.6
E9.31	L9.31	-72.1
E9.31	L9.32	-34.3
E9.32	L9.00	-40.5
E9.32	L9.01	-35.2
E9.32	L9.02	-33.8
E9.32	L9.03	-33
E9.32	L9.04	-37
E9.32	L9.05	-32
E9.32	L9.06	-36.2
E9.32	L9.07	-31.8
E9.32	L9.08	-37.1
E9.32	L9.09	-32.3
E9.32	L9.10	-29.8
E9.32	L9.11	-35
E9.32	L9.12	-27.7
E9.32	L9.13	-33.6
E9.32	L9.14	-30.3
E9.32	L9.15	-30.1
E9.32	L9.16	-32.4
E9.32	L9.17	-32.5
E9.32	L9.18	-30.4
E9.32	L9.19	-28.8
E9.32	L9.20	-35
E9.32	L9.21	-30.3
E9.32	L9.22	-23.2
E9.32	L9.23	-35.9
E9.32	L9.24	-26
E9.32	L9.25	-29.5
E9.32	L9.26	-36
E9.32	L9.27	-27.9
E9.32	L9.28	-37.2
E9.32	L9.29	-33.8
E9.32	L9.30	-35.3
E9.32	L9.31	-27.9
E9.32	L9.32	-59.7
