# Supplementary material for: Assessing long-distance RNA sequence connectivity via RNA-templated DNA–DNA ligation
Source: eLife. 2015 Apr 13;4:e03700. doi: 10.7554/eLife.03700 (PMC4442144; doi:10.7554/eLife.03700)
Supplement: Supplementary file 4. — Dscam1 isoforms with observed expression significantly different from expected. DOI: http://dx.doi.org/10.7554/eLife.03700.020 [file elife03700s004.xlsx]

## Sheet: ST4-Isoform DE
	Isoforms from 14-16 h embryos with DESeq padj(q-value) <0.05 Observed vs Expected usage
	DESeq output
	Isoform	Change	log2 change	p-value	q-value
	Exon 4:9 Combinations
	02:01:00	7.76554	2.95709	1.45787e-05	0.000842697
	02:03:00	4.20453	2.07194	0.000681261	0.0180534
	02:05:00	3.92823	1.97388	0.000604731	0.0172581
	02:07:00	8.84269	3.14448	8.85714e-05	0.00365111
	02:08:00	4.13538	2.04802	0.000305636	0.00944924
	02:14:00	19.0653	4.25288	7.63034e-12	9.43619e-10
	02:16:00	21.2849	4.41176	1.00831e-08	9.35211e-07
	02:20:00	6.05548	2.59824	4.77508e-05	0.00221444
	02:21:00	4.37124	2.12804	0.00136845	0.0338464
	02:24:00	12.1273	3.60018	7.14938e-07	5.30484e-05
	02:29:00	6.81519	2.76875	1.58999e-05	0.000842697
	02:32:00	6.43685	2.68635	9.87303e-05	0.00366289
	07:13:00	3.94496	1.98001	0.0018074	0.0419091
	07:31:00	4.82543	2.27066	0.000199205	0.00671865
	09:06:00	30.2086	4.91689	2.34935e-13	4.35805e-11
	09:30:00	185.848	7.53798	2.83538e-15	1.05193e-12
	Exon 4:6:9 Combinations
	01:14:09	23.6472	4.5636	0.000159307	0.0281479
	01:33:09	35.3263	5.14267	1.1003e-05	0.00467787
	02:01:25	38.8344	5.27926	0.000161711	0.0281479
	04:36:06	103.344	6.69131	1.17749e-08	2.35969e-05
	06:02:06	33.6858	5.07407	0.000132749	0.0281479
	07:13:06	28.1792	4.81656	3.85207e-05	0.00964943
	08:13:06	59.9265	5.90512	2.88583e-05	0.00846502
	08:36:06	145.269	7.18258	1.14176e-05	0.00467787
	10:10:09	67.8598	6.08448	1.16713e-05	0.00467787
	11:18:08	32.5805	5.02594	2.95684e-05	0.00846502
	11:26:30	49.6232	5.63294	0.00016855	0.0281479
	11:48:09	13.8586	3.79271	0.000296764	0.0457473
	12:18:09	56.1217	5.81049	7.82443e-06	0.00467787
