# Supplementary figures and images for: Assessing long-distance RNA sequence connectivity via RNA-templated DNA–DNA ligation
Source: eLife journal article supplement (doi:10.7554/elife.03700), 2015-04-13

## Technical Replicates

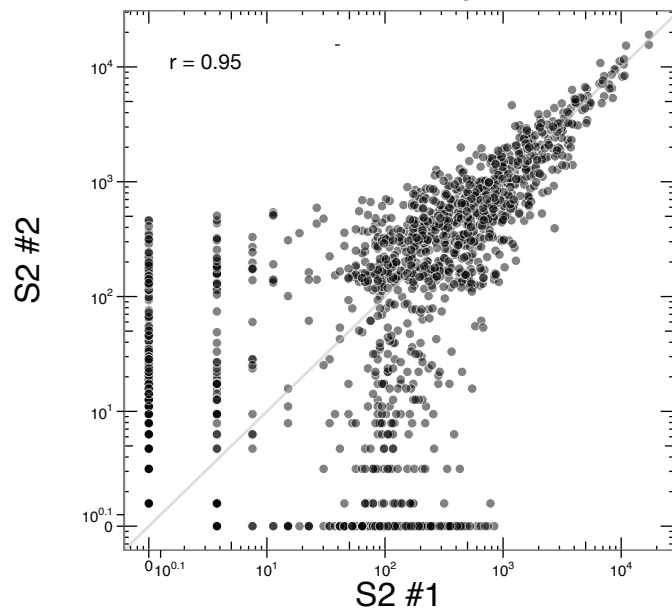

## Biological Replicates

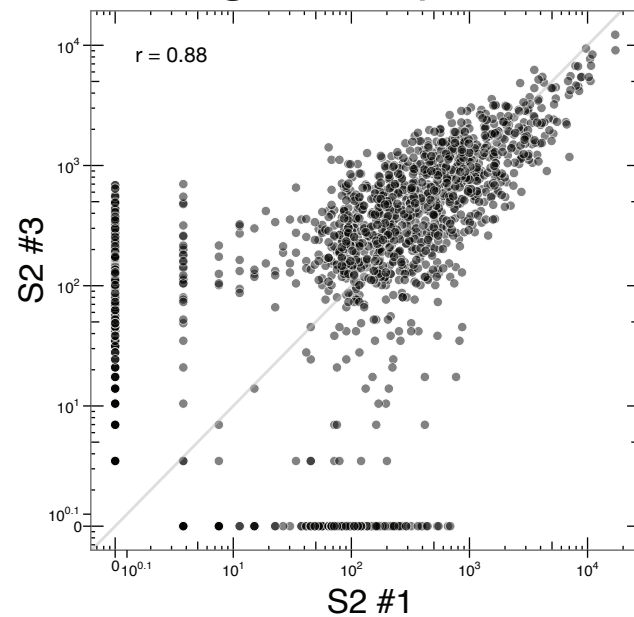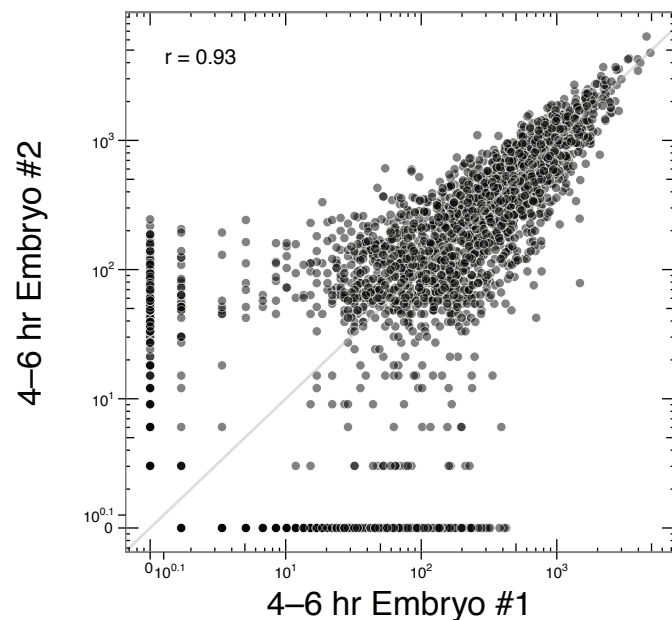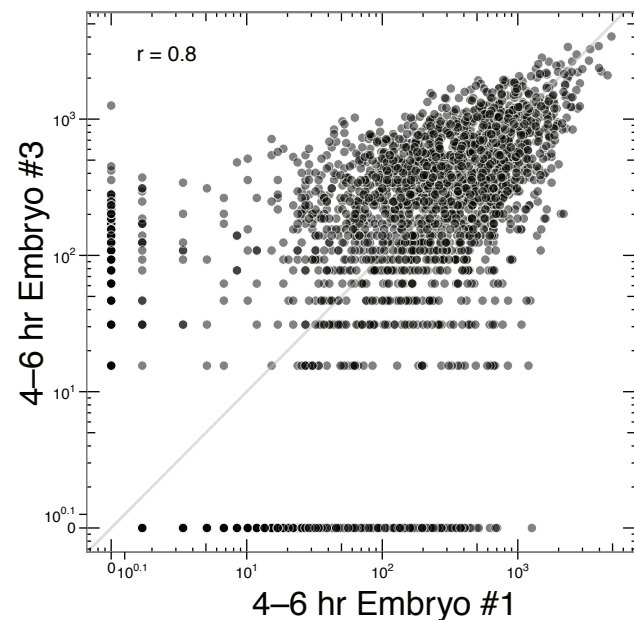

reads per million

reads per million

Supplement: supp [file elife-03700-supp-v1.zip]

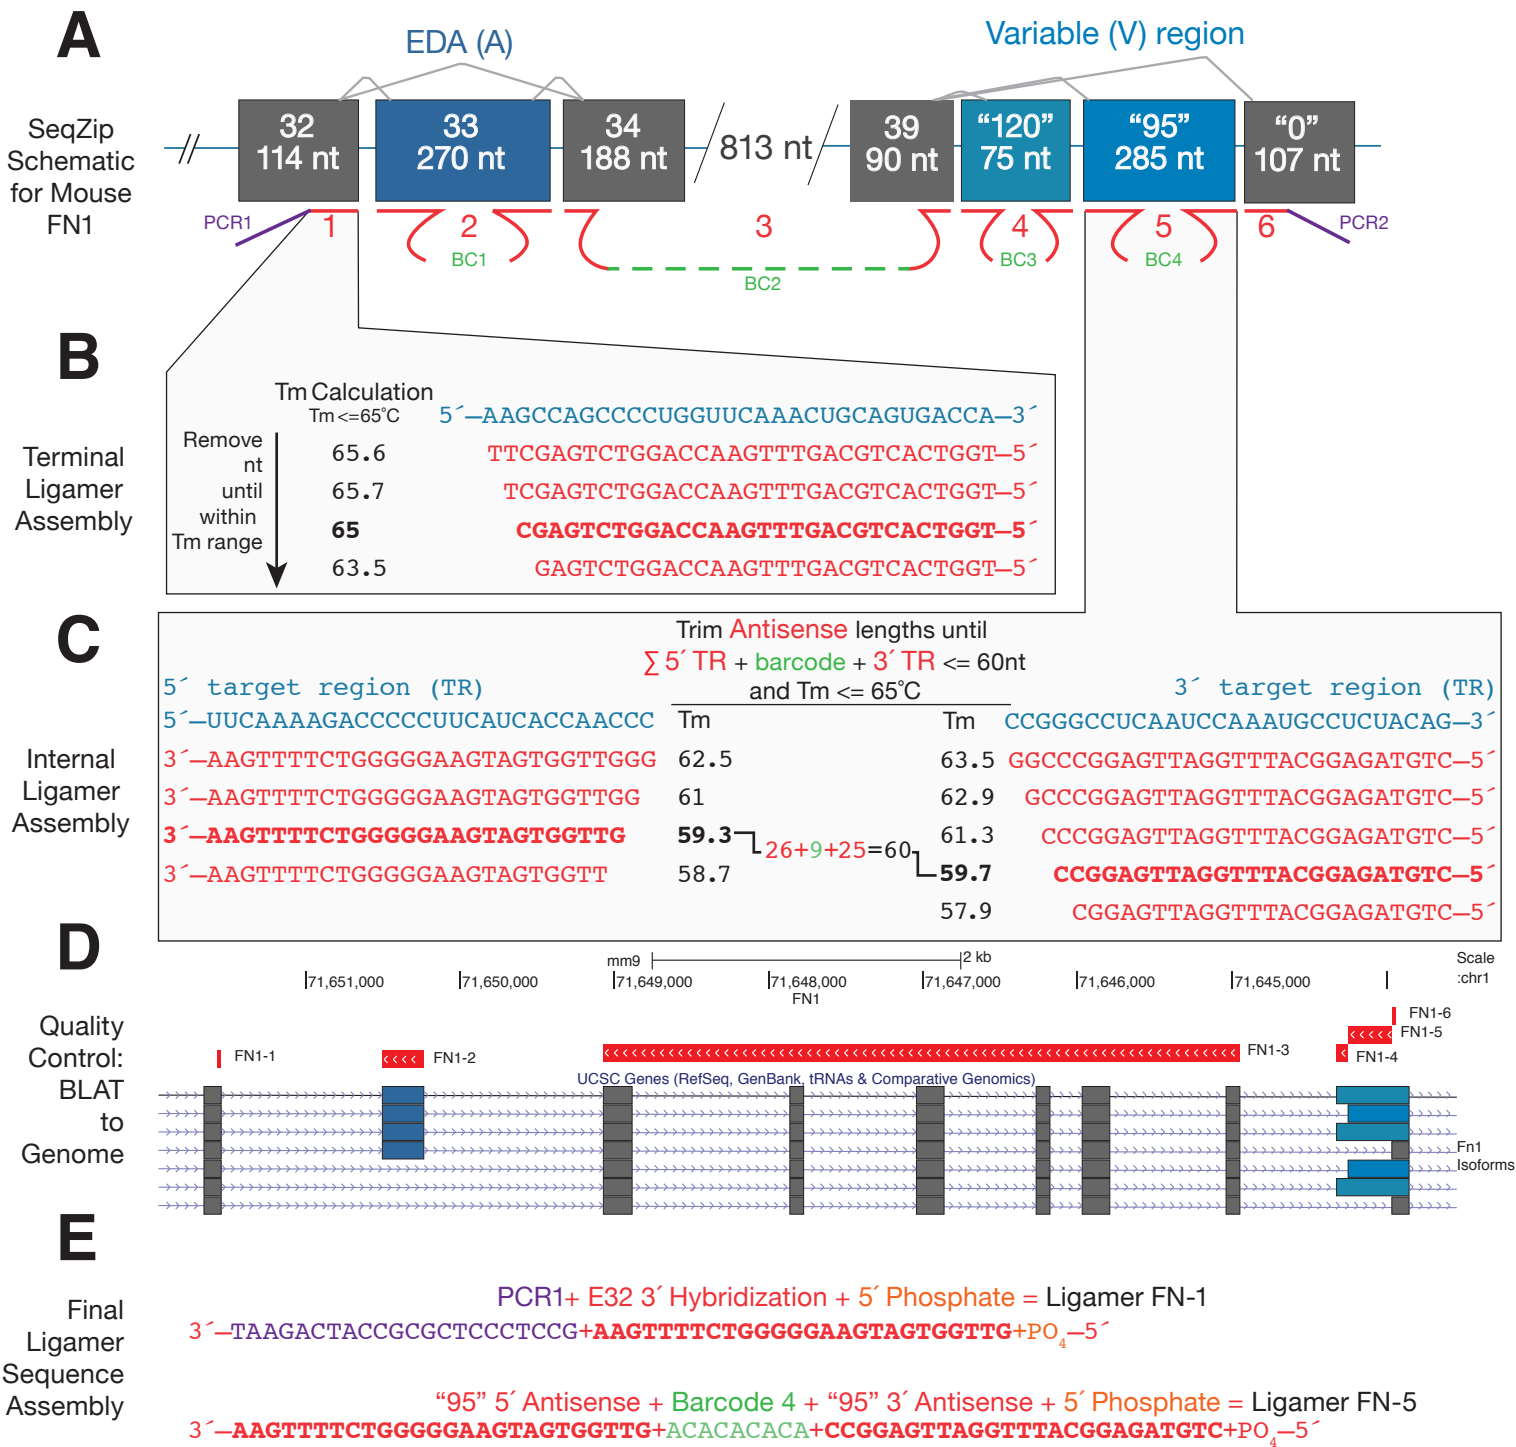

Supplement: supp [file elife-03700-supp-v1.zip]

**A**

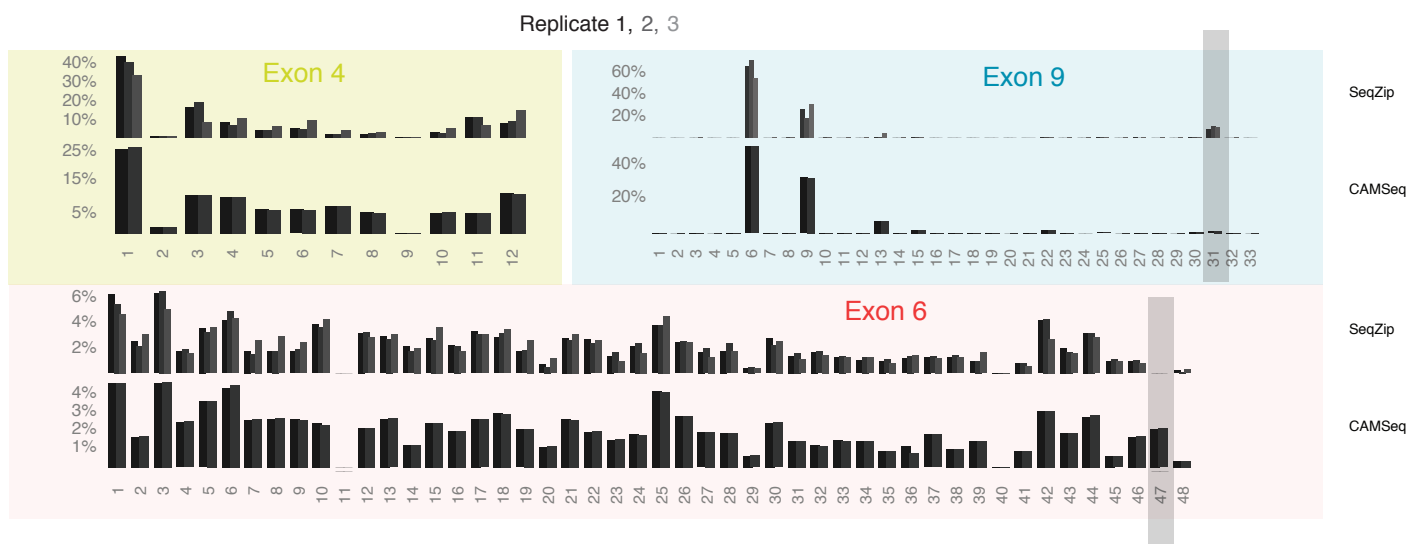

**B**

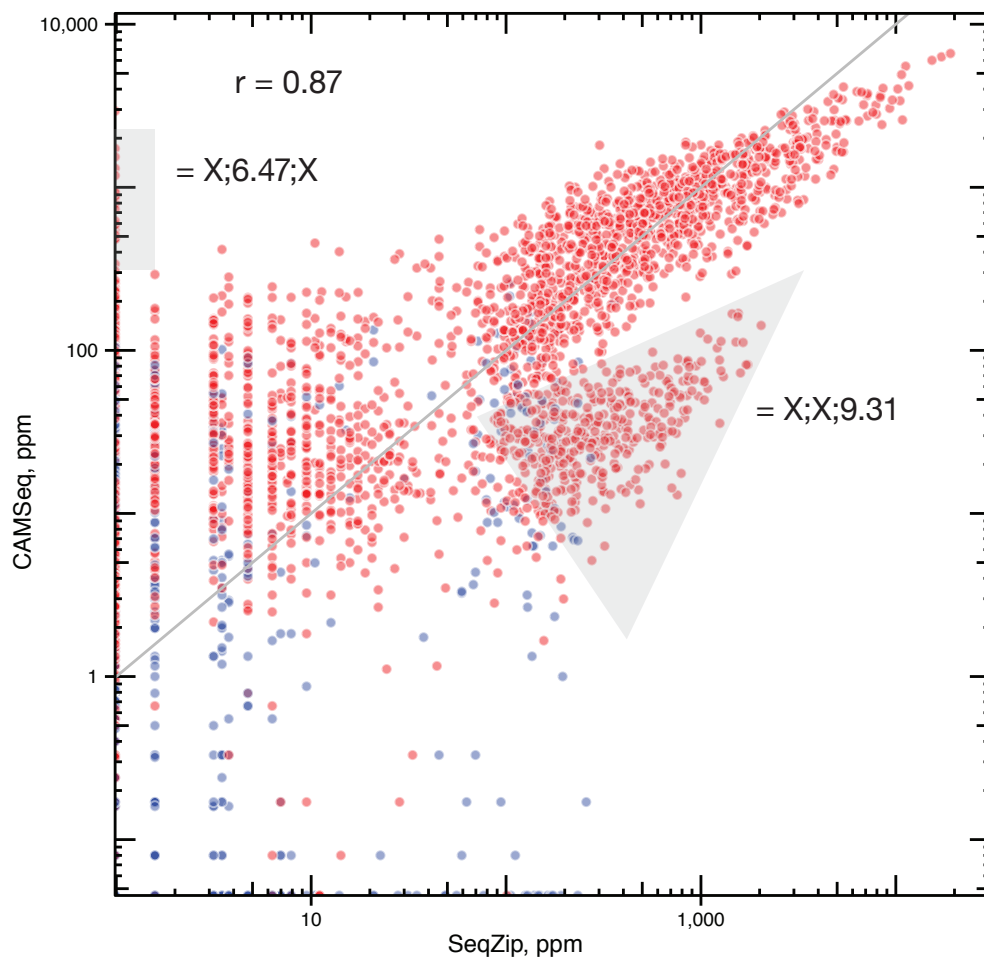

Supplement: supp [file elife-03700-supp-v1.zip]

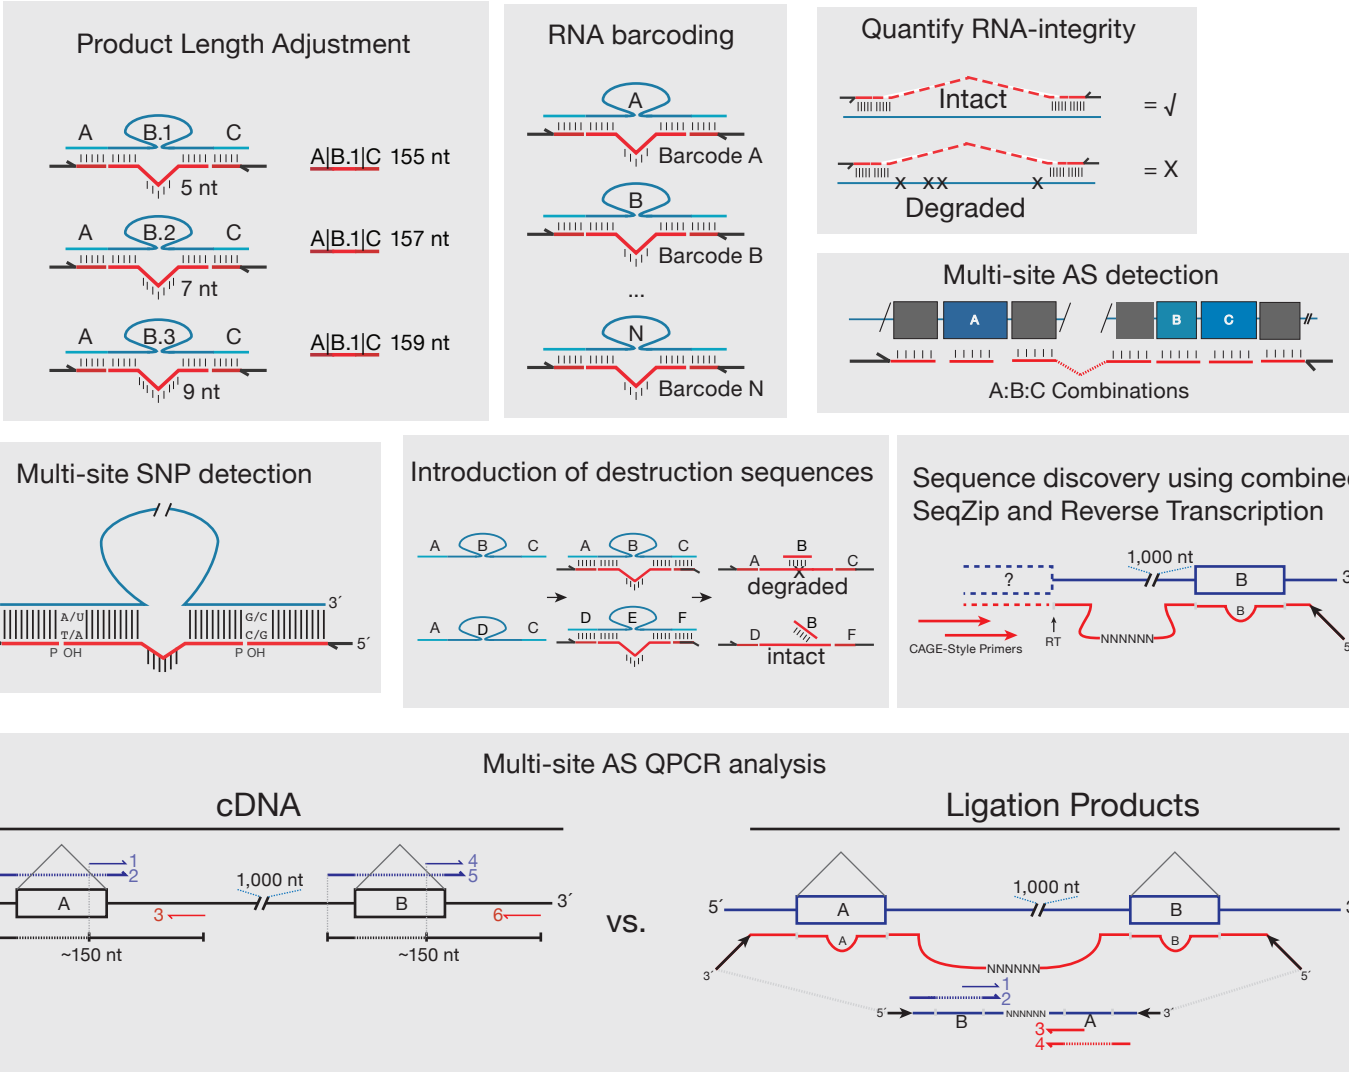

Supplement: supp [file elife-03700-supp-v1.zip]

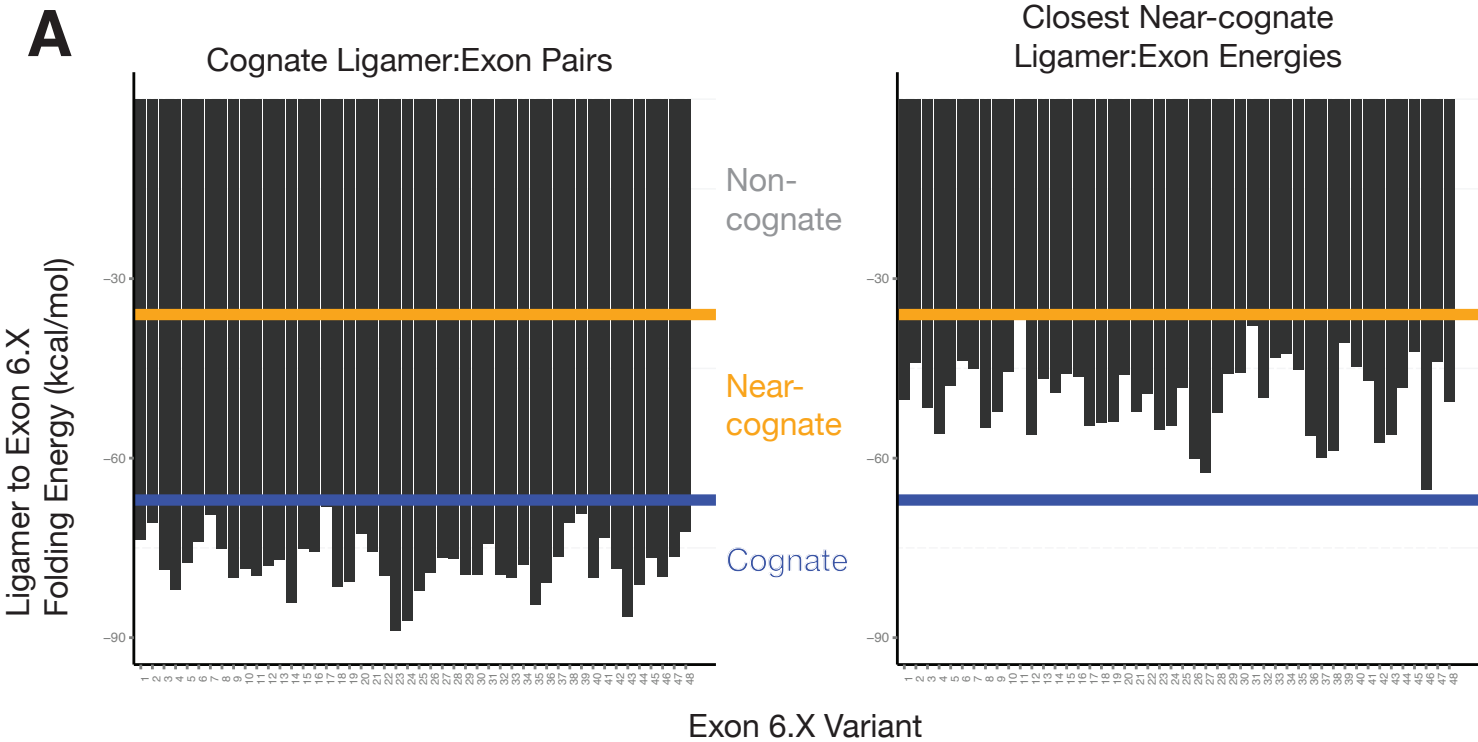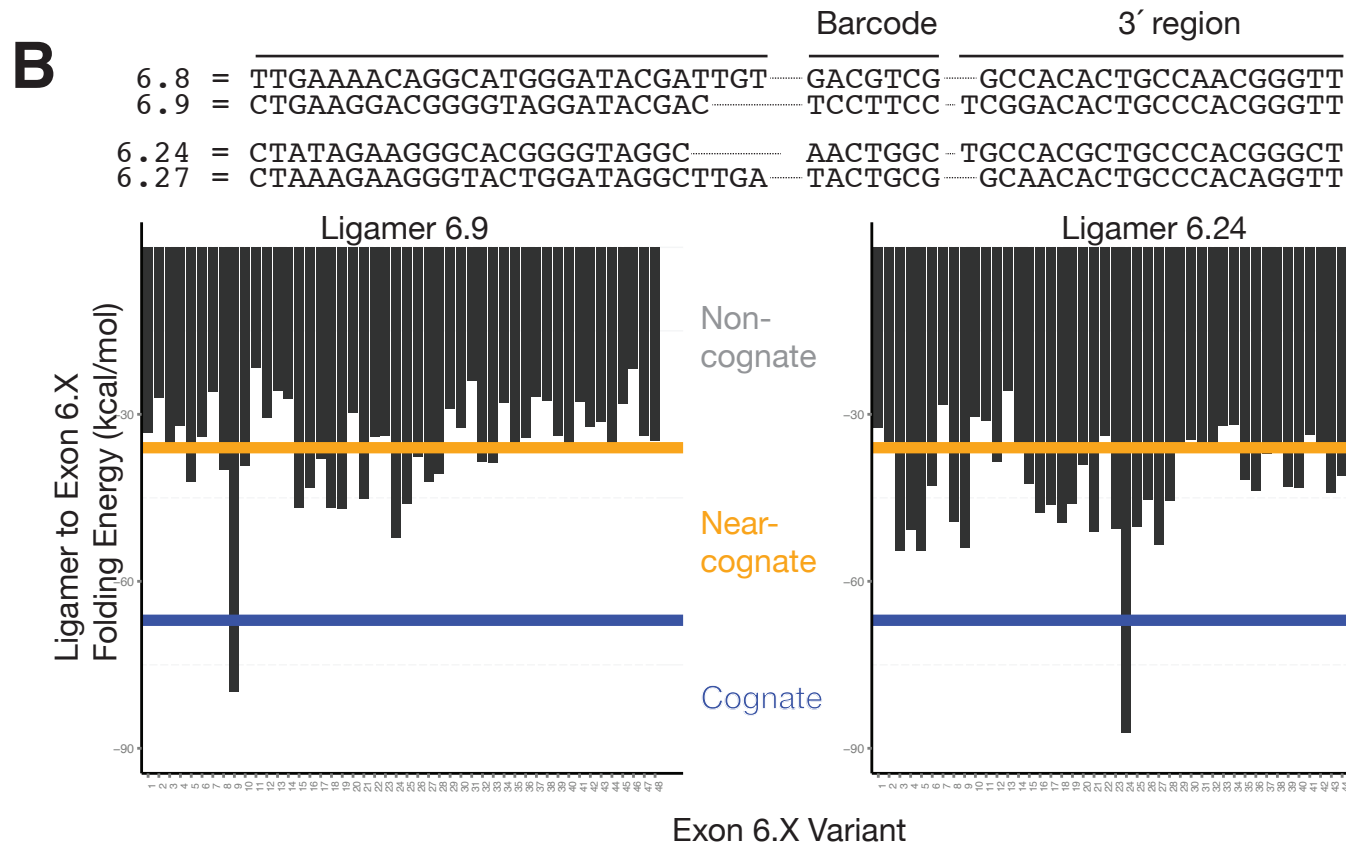

Supplement: supp [file elife-03700-supp-v1.zip]

Roy et al., Supplemental Figure 1 - Figure 2

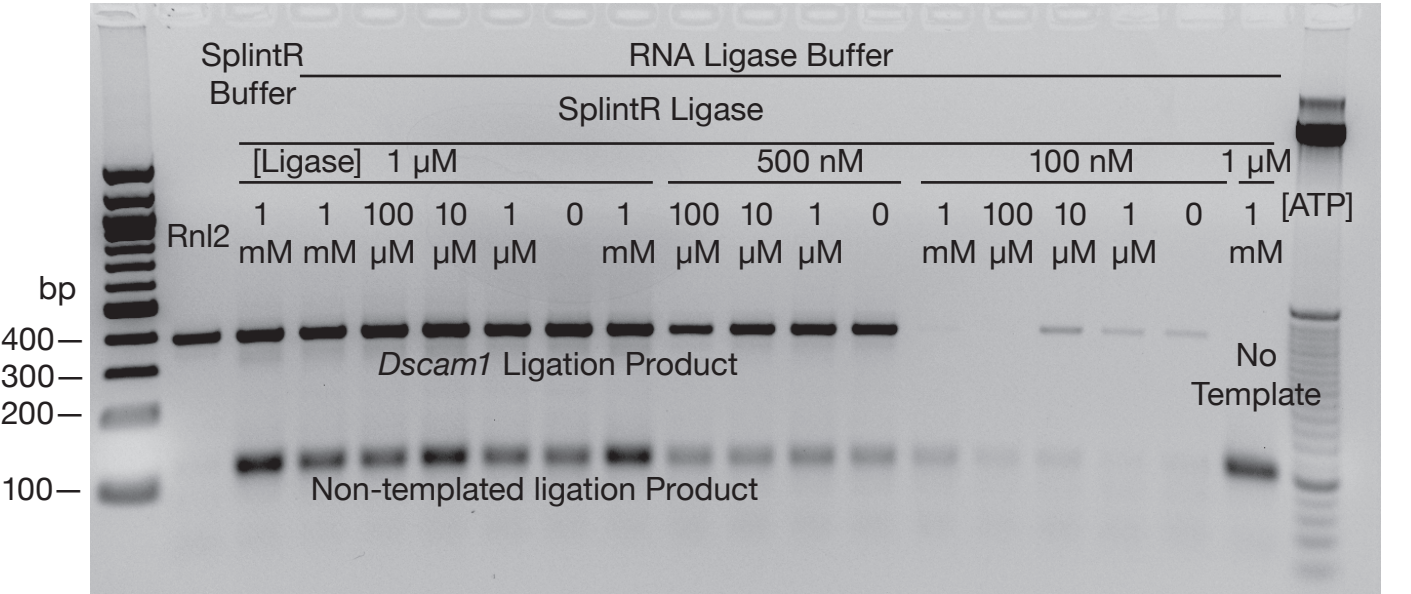

Supplement: supp [file elife-03700-supp-v1.zip]
